# Supplementary material
Source: publisher figshare collection journal article supplement (https://acs.figshare.com/ndownloader/files/13902833)
Supplement: Supplementary file 1 [file 13902833]

## Sheet: T=0.7Tc,W=1.08kTc
y-coordinate, averaged density profile ρf*(y), and uncertainty of the averaged density profile Δρf*(y) of the adsorption isotherm for:
T / Tc = 0.7,
ρs / σf-3 = 1.07, and
Ϛ = 0.35.
The averaged density profiles are indicated with the respective bulk fluid pressure pfb / esf-3.
pfb / esf-3 =	0.002394(39)		pfb / esf-3 =	0.004611(34)		pfb / esf-3 =	0.00683(11)		pfb / esf-3 =	0.00876(18)		pfb / esf-3 =	0.01068(33)		pfb / esf-3 =	0.01226(27)		pfb / esf-3 =	0.01408(32)		pfb / esf-3 =	0.0159(9)		pfb / esf-3 =	0.0167(7)		pfb / esf-3 =	0.01787(36)
y / σf	ρf*(y) / σf-3	Δρf*(y) / σf-3	y / σf	ρf*(y) / σf-3	Δρf*(y) / σf-3	y / σf	ρf*(y) / σf-3	Δρf*(y) / σf-3	y / σf	ρf*(y) / σf-3	Δρf*(y) / σf-3	y / σf	ρf*(y) / σf-3	Δρf*(y) / σf-3	y / σf	ρf*(y) / σf-3	Δρf*(y) / σf-3	y / σf	ρf*(y) / σf-3	Δρf*(y) / σf-3	y / σf	ρf*(y) / σf-3	Δρf*(y) / σf-3	y / σf	ρf*(y) / σf-3	Δρf*(y) / σf-3	y / σf	ρf*(y) / σf-3	Δρf*(y) / σf-3
4.79975	8.82442e-08	2.2538e-07	4.79962	2.45477e-07	5.09922e-07	4.7997	2.91703e-06	7.25084e-06	4.79931	1.00912e-05	1.82439e-05	4.79975	4.94927e-06	7.3178e-06	4.79954	2.62405e-05	3.80522e-05	4.7997	1.72555e-05	3.98167e-05	4.79963	0	0	4.79968	0	0	4.7997	0	0
4.95712	1.63247e-07	3.63607e-07	4.95699	2.39734e-07	4.73705e-07	4.95707	4.00276e-06	1.00733e-05	4.95667	1.05931e-05	1.49419e-05	4.95712	6.68903e-06	1.25975e-05	4.9569	2.99994e-05	4.07428e-05	4.95707	1.79288e-05	4.49863e-05	4.957	0	0	4.95704	0	0	4.95707	0	0
5.11449	1.95345e-07	3.44494e-07	5.11435	4.66128e-07	5.93239e-07	5.11444	5.02052e-06	1.29705e-05	5.11402	1.36064e-05	1.27434e-05	5.11448	9.58104e-06	1.72082e-05	5.11427	3.71143e-05	5.70629e-05	5.11444	2.1461e-05	4.92904e-05	5.11436	0	0	5.11441	0	0	5.11444	0	0
5.27186	4.27768e-06	1.1708e-06	5.27172	7.09011e-06	3.31166e-06	5.2718	1.46258e-05	4.30396e-06	5.27138	3.07938e-05	1.2305e-05	5.27185	2.93599e-05	1.37736e-05	5.27163	6.68759e-05	4.72666e-05	5.2718	4.65249e-05	5.45877e-05	5.27173	2.97324e-05	7.58265e-06	5.27178	3.22765e-05	7.27841e-06	5.2718	3.74974e-05	1.46771e-05
5.42923	0.000866332	6.18475e-05	5.42908	0.00170743	0.000103184	5.42917	0.00257453	0.000228431	5.42873	0.00345995	0.000442245	5.42922	0.00442426	0.000356051	5.42899	0.00512647	0.000496565	5.42917	0.00594349	0.000489082	5.42909	0.00687308	0.000733991	5.42914	0.00787975	0.000536119	5.42917	0.00878205	0.00108029
5.5866	0.00741345	0.00024515	5.58645	0.0146782	0.00123781	5.58654	0.0219931	0.00142068	5.58608	0.0296602	0.00339379	5.58659	0.0376587	0.0027609	5.58635	0.043573	0.00381588	5.58654	0.0506542	0.00492738	5.58646	0.0583694	0.00715286	5.58651	0.0673256	0.00370912	5.58654	0.0747168	0.00844278
5.74397	0.0131389	0.000539213	5.74381	0.0256399	0.00150784	5.7439	0.0386538	0.00191002	5.74344	0.0518117	0.00605626	5.74396	0.0662903	0.00536162	5.74371	0.0765175	0.00642007	5.7439	0.0887368	0.00784228	5.74382	0.103006	0.0138148	5.74388	0.118077	0.00619015	5.7439	0.130212	0.0155507
5.90134	0.00956152	0.000424528	5.90118	0.0186169	0.00098968	5.90127	0.0280699	0.00154176	5.90079	0.0377084	0.00409644	5.90133	0.0483373	0.00389436	5.90108	0.0562571	0.00515218	5.90127	0.065009	0.00556429	5.90119	0.0753403	0.0102769	5.90124	0.086338	0.0042063	5.90127	0.0953293	0.0119873
6.05871	0.00642645	0.000401286	6.05854	0.0123527	0.000512652	6.05864	0.0188184	0.000886569	6.05815	0.0253243	0.0029925	6.0587	0.0323267	0.00273863	6.05844	0.0379332	0.0029627	6.05864	0.0441812	0.00463046	6.05855	0.0511648	0.00738433	6.05861	0.0583614	0.00175501	6.05864	0.0651606	0.00856846
6.21608	0.004943	0.000340862	6.21591	0.0094467	0.000318495	6.21601	0.0144453	0.000573158	6.2155	0.0196301	0.0021397	6.21607	0.0251496	0.00248855	6.2158	0.029458	0.00222374	6.21601	0.0345889	0.00393053	6.21592	0.0403194	0.00578238	6.21598	0.0458861	0.00103235	6.21601	0.0520624	0.00723894
6.37344	0.00414822	0.000202464	6.37327	0.0081145	0.00024505	6.37337	0.0123989	0.000548968	6.37286	0.0170486	0.00203424	6.37343	0.0218638	0.00207732	6.37316	0.0257446	0.00206439	6.37337	0.0303399	0.00330935	6.37328	0.035645	0.00524473	6.37334	0.0409943	0.00165054	6.37337	0.0468244	0.00716902
6.53081	0.00378585	0.000165311	6.53064	0.00745857	0.000307163	6.53074	0.0114872	0.000397611	6.53021	0.0157924	0.00162273	6.5308	0.0204861	0.0020005	6.53052	0.0243944	0.00207379	6.53074	0.0288938	0.00301191	6.53065	0.0341176	0.00497266	6.53071	0.0397382	0.00173722	6.53074	0.045976	0.00739616
6.68818	0.00357585	0.000155277	6.688	0.00706959	0.000323406	6.68811	0.0110488	0.000513664	6.68757	0.0152032	0.0016059	6.68817	0.0198519	0.00185813	6.68789	0.0237675	0.00210099	6.68811	0.0283723	0.00286438	6.68801	0.0338329	0.00501989	6.68808	0.0393255	0.00116538	6.68811	0.0464656	0.00762216
6.84555	0.00345957	0.000136293	6.84537	0.00689083	0.000374263	6.84548	0.0106729	0.000436033	6.84492	0.0146771	0.00158431	6.84554	0.0190614	0.00175507	6.84525	0.0229035	0.00199152	6.84548	0.0274167	0.00242835	6.84538	0.0326989	0.00479167	6.84544	0.0379964	0.00147167	6.84548	0.0450616	0.00757915
7.00292	0.00338567	0.000152106	7.00273	0.00667362	0.000256609	7.00284	0.0103234	0.000390317	7.00228	0.0142263	0.00166668	7.00291	0.0182286	0.00171118	7.00261	0.0218237	0.00199986	7.00284	0.0260387	0.00246946	7.00274	0.0307965	0.00491257	7.00281	0.0354772	0.00137459	7.00284	0.0423238	0.00801433
7.16029	0.00336639	0.00015024	7.1601	0.00650969	0.000213772	7.16021	0.0101711	0.000484861	7.15963	0.0138494	0.00165946	7.16028	0.0175791	0.00139216	7.15997	0.021026	0.00156606	7.16021	0.02492	0.00231889	7.16011	0.0293185	0.00475742	7.16018	0.0337679	0.00182167	7.16021	0.0397236	0.00731458
7.31766	0.00332548	8.93422e-05	7.31746	0.00645794	0.000209661	7.31758	0.0100226	0.000659727	7.31698	0.013661	0.00123234	7.31765	0.0171459	0.00142725	7.31733	0.0204553	0.00180414	7.31758	0.0241423	0.00197907	7.31747	0.028216	0.00403695	7.31754	0.0325375	0.00216291	7.31758	0.0380226	0.00628867
7.47503	0.00331701	3.08973e-05	7.47483	0.00643627	0.000283927	7.47494	0.00989631	0.000341594	7.47434	0.0133734	0.00109608	7.47502	0.0169318	0.00145878	7.4747	0.0201856	0.0018937	7.47494	0.0238036	0.00226592	7.47484	0.0275945	0.00339949	7.47491	0.0316334	0.00157035	7.47494	0.0372148	0.00615168
7.6324	0.00330072	7.15241e-05	7.63219	0.00641114	0.000308425	7.63231	0.00984445	0.000458895	7.63169	0.0132822	0.00100068	7.63238	0.016756	0.00160941	7.63206	0.0199182	0.00212315	7.63231	0.0234593	0.00224248	7.6322	0.0271332	0.00340577	7.63228	0.0312422	0.00128241	7.63231	0.0364888	0.0061087
7.78977	0.00331553	0.00010342	7.78956	0.0063787	0.000186772	7.78968	0.00980547	0.000509252	7.78905	0.0131779	0.0011305	7.78975	0.016542	0.00167846	7.78942	0.0196386	0.00214442	7.78968	0.0231802	0.00221704	7.78957	0.0267911	0.00324269	7.78964	0.0308858	0.00111902	7.78968	0.0359441	0.00652704
7.94713	0.00333372	0.000113506	7.94692	0.00637677	0.000203647	7.94705	0.00967492	0.000207038	7.9464	0.0131234	0.00106271	7.94712	0.0165052	0.00151454	7.94678	0.0193913	0.00207628	7.94705	0.0229135	0.00168395	7.94693	0.0265351	0.0029807	7.94701	0.0302732	0.00152415	7.94705	0.0352617	0.00692982
8.1045	0.00333816	6.09599e-05	8.10428	0.00641746	0.000301399	8.10441	0.00966473	0.000266639	8.10376	0.0131137	0.00128034	8.10449	0.0165256	0.00157688	8.10414	0.0192623	0.00217792	8.10441	0.0226546	0.00160035	8.1043	0.026123	0.00286444	8.10437	0.029992	0.0017675	8.10441	0.0347959	0.00695732
8.26187	0.00331865	6.49825e-05	8.26165	0.00639566	0.000235454	8.26178	0.00969487	0.000390377	8.26111	0.0131134	0.0011862	8.26186	0.0164626	0.00185261	8.26151	0.0192374	0.00239883	8.26178	0.0226379	0.00184741	8.26166	0.0260803	0.00238079	8.26174	0.0297829	0.00183873	8.26178	0.0343928	0.00664024
8.41924	0.00331773	6.5625e-05	8.41901	0.00640032	0.00021272	8.41915	0.00966771	0.000239635	8.41847	0.013101	0.00105055	8.41923	0.0164752	0.00172721	8.41887	0.0192478	0.0020164	8.41915	0.0226089	0.00194851	8.41903	0.0258614	0.00221927	8.41911	0.0294484	0.00175413	8.41915	0.0341602	0.00602084
8.57661	0.0033248	6.64985e-05	8.57638	0.00637553	0.000280606	8.57652	0.00957755	0.00033385	8.57582	0.0130638	0.00108397	8.5766	0.016417	0.00166868	8.57623	0.0192464	0.00153935	8.57652	0.022499	0.00185331	8.57639	0.0258682	0.00247097	8.57647	0.0292777	0.00178641	8.57652	0.0337605	0.00531397
8.73398	0.00331381	9.44001e-05	8.73374	0.0064012	0.000277926	8.73388	0.00959621	0.000367567	8.73317	0.0129533	0.000845984	8.73397	0.0164026	0.00156142	8.73359	0.0191206	0.0017872	8.73388	0.022438	0.00198464	8.73376	0.0258648	0.00212525	8.73384	0.0292114	0.00184489	8.73388	0.0334856	0.00547868
8.89135	0.00331535	0.000139037	8.89111	0.00641765	0.000376144	8.89125	0.00961186	0.000251248	8.89053	0.013066	0.000977637	8.89133	0.016397	0.00142857	8.89095	0.0192011	0.00176428	8.89125	0.0223597	0.00188804	8.89112	0.0257834	0.00220711	8.89121	0.0292271	0.00168712	8.89125	0.0332389	0.00594543
9.04872	0.00332946	0.000144449	9.04847	0.00642765	0.000351854	9.04862	0.00962875	0.000510289	9.04788	0.0131227	0.000923771	9.0487	0.0163165	0.00133382	9.04832	0.0191772	0.0016784	9.04862	0.0223942	0.00199123	9.04849	0.0258742	0.00249348	9.04857	0.028973	0.00197457	9.04862	0.0329287	0.00595449
9.20609	0.00332235	0.000146708	9.20584	0.00642302	0.000335007	9.20598	0.00964543	0.000673483	9.20524	0.0130667	0.00101715	9.20607	0.0163746	0.00119302	9.20568	0.0190126	0.00182185	9.20598	0.0223399	0.0018796	9.20585	0.0259578	0.00295917	9.20594	0.0288615	0.00207222	9.20598	0.0328247	0.00564463
9.36346	0.00332177	0.000122625	9.3632	0.00643791	0.000426123	9.36335	0.00965412	0.000517252	9.36259	0.0130713	0.00105016	9.36344	0.0163631	0.0010745	9.36304	0.01915	0.00182319	9.36335	0.0223151	0.00163143	9.36322	0.0259062	0.0024114	9.36331	0.0289533	0.0021084	9.36335	0.0326145	0.00511676
9.52082	0.00329125	0.000128542	9.52057	0.00644948	0.000291734	9.52072	0.00966411	0.000350365	9.51995	0.0131079	0.000936653	9.52081	0.0164277	0.00124114	9.5204	0.0191999	0.00189394	9.52072	0.0224074	0.00225857	9.52058	0.0258043	0.00241916	9.52067	0.0290453	0.00226276	9.52072	0.0324349	0.00471826
9.67819	0.0033093	0.000143127	9.67793	0.00643013	0.000355335	9.67809	0.00967981	0.000345012	9.6773	0.0131097	0.00121407	9.67818	0.01636	0.00088657	9.67776	0.0190842	0.00178246	9.67809	0.0224424	0.00251685	9.67795	0.0256311	0.00185767	9.67804	0.0290098	0.00275142	9.67809	0.0324216	0.00475762
9.83556	0.00331782	0.000152428	9.8353	0.00641673	0.000311247	9.83545	0.0096619	0.000332654	9.83466	0.0130565	0.00107845	9.83555	0.0163005	0.00108522	9.83513	0.018964	0.0019961	9.83545	0.0224377	0.00217843	9.83531	0.0255465	0.00180608	9.83541	0.0287313	0.00259068	9.83545	0.0324816	0.0044554
9.99293	0.0033226	0.000181612	9.99266	0.00639536	0.000279068	9.99282	0.00970223	0.000440259	9.99201	0.0130601	0.00101096	9.99292	0.0162402	0.000732584	9.99249	0.0189978	0.00192931	9.99282	0.0224416	0.00213497	9.99268	0.0255108	0.00214327	9.99277	0.0287694	0.00238888	9.99282	0.0324935	0.00441198
10.1503	0.00334936	0.00021901	10.15	0.00636357	0.000347312	10.1502	0.00965166	0.000336271	10.1494	0.0131176	0.00127611	10.1503	0.0162613	0.000751194	10.1498	0.0191516	0.00189073	10.1502	0.0223857	0.00211497	10.15	0.0256888	0.0024113	10.1501	0.0287376	0.0025596	10.1502	0.0323148	0.00382238
10.3077	0.00336929	0.000272853	10.3074	0.00641677	0.000363042	10.3076	0.00964312	0.000277027	10.3067	0.0130915	0.00107115	10.3077	0.0162082	0.00121104	10.3072	0.0191853	0.00223911	10.3076	0.0224043	0.00199332	10.3074	0.0256969	0.00244195	10.3075	0.0288229	0.00247316	10.3076	0.0319889	0.00299182
10.465	0.00335377	0.000208455	10.4648	0.00639583	0.00044982	10.4649	0.00964098	0.000312841	10.4641	0.0130475	0.000761301	10.465	0.0161405	0.000907175	10.4646	0.0192068	0.00222085	10.4649	0.0224131	0.00195445	10.4648	0.0255858	0.00198026	10.4649	0.0290495	0.0024816	10.4649	0.0317584	0.00303004
10.6224	0.00332887	0.000131826	10.6221	0.00643962	0.000414488	10.6223	0.00971496	0.000355158	10.6214	0.0130064	0.000853731	10.6224	0.0161906	0.00120095	10.6219	0.019118	0.00234116	10.6223	0.0225172	0.00212169	10.6221	0.0256835	0.00200505	10.6222	0.0291699	0.00242081	10.6223	0.0321706	0.00336629
10.7798	0.00334158	0.000168213	10.7795	0.00644061	0.000454608	10.7797	0.00967032	0.0005955	10.7788	0.012983	0.000964447	10.7798	0.0162434	0.00108475	10.7793	0.0190024	0.00223588	10.7797	0.022378	0.00211259	10.7795	0.0255837	0.00187206	10.7796	0.0293029	0.00242518	10.7797	0.032247	0.00296781
10.9371	0.00335918	0.000119342	10.9369	0.00648484	0.000355962	10.937	0.00968253	0.000386896	10.9361	0.0129907	0.000657332	10.9371	0.0162343	0.00113252	10.9367	0.0190596	0.00198836	10.937	0.0223867	0.00210646	10.9369	0.0255841	0.0019299	10.937	0.0291428	0.00246887	10.937	0.0321823	0.00265575
11.0945	0.00333125	0.000111851	11.0942	0.006461	0.000388723	11.0944	0.00972424	0.000479849	11.0935	0.0130146	0.000728259	11.0945	0.0162694	0.00103626	11.094	0.0190697	0.00231128	11.0944	0.0222878	0.00163654	11.0942	0.0255347	0.00166806	11.0943	0.0292297	0.00290197	11.0944	0.0321	0.00222613
11.2519	0.00332018	0.000101341	11.2516	0.00638639	0.000357317	11.2518	0.00968411	0.000535975	11.2508	0.013032	0.000769597	11.2519	0.0162861	0.00106727	11.2514	0.0190523	0.00222241	11.2518	0.0221774	0.00134004	11.2516	0.0255009	0.00196458	11.2517	0.0291793	0.00225208	11.2518	0.0320828	0.00237933
11.4093	0.00333242	0.000145172	11.4089	0.00638524	0.000370398	11.4091	0.00974155	0.0006494	11.4082	0.013003	0.000715459	11.4092	0.0163173	0.000774481	11.4087	0.0191387	0.0022321	11.4091	0.022292	0.00128043	11.409	0.0254016	0.00192275	11.4091	0.0290794	0.00292595	11.4091	0.0317639	0.00227162
11.5666	0.00333605	0.000246298	11.5663	0.00643637	0.000466024	11.5665	0.00972431	0.000743071	11.5656	0.013044	0.000756955	11.5666	0.0163519	0.000919028	11.5661	0.0192454	0.00254466	11.5665	0.0224259	0.00153862	11.5663	0.0253581	0.00138968	11.5664	0.0292207	0.00320056	11.5665	0.0318721	0.00265576
11.724	0.00331663	0.000210445	11.7237	0.00648919	0.000596814	11.7239	0.00971145	0.000570433	11.7229	0.0129874	0.00069032	11.724	0.0162625	0.000779758	11.7235	0.0190557	0.00212349	11.7239	0.0223589	0.00140192	11.7237	0.0255677	0.0018833	11.7238	0.029292	0.00359065	11.7239	0.0321279	0.00227563
11.8814	0.00330731	0.000190616	11.881	0.00647827	0.000654566	11.8812	0.00972038	0.000955317	11.8803	0.0130124	0.000653616	11.8813	0.0163004	0.00103457	11.8808	0.0190233	0.00216	11.8812	0.0223213	0.00143123	11.8811	0.0255728	0.00155302	11.8812	0.029387	0.00342016	11.8812	0.0320804	0.00168274
12.0387	0.0033041	0.000197907	12.0384	0.00649205	0.000500687	12.0386	0.0097195	0.000725156	12.0376	0.0130567	0.000659092	12.0387	0.0163029	0.00106766	12.0382	0.0189683	0.00170993	12.0386	0.0223382	0.00151276	12.0384	0.0254958	0.00112371	12.0385	0.0293965	0.00327047	12.0386	0.0319398	0.00196277
12.1961	0.00333845	0.000174413	12.1958	0.00646586	0.000552371	12.196	0.00964751	0.000709915	12.195	0.013038	0.000762575	12.1961	0.0163527	0.00110435	12.1956	0.0189513	0.0016949	12.196	0.022459	0.00175369	12.1958	0.0254834	0.00129078	12.1959	0.0293383	0.00339651	12.196	0.0319241	0.00199728
12.3535	0.00333984	0.000213068	12.3531	0.00645964	0.000588032	12.3533	0.00970529	0.000714249	12.3523	0.0130371	0.000960049	12.3534	0.0162735	0.000634436	12.3529	0.0190873	0.00203615	12.3533	0.0224438	0.00154025	12.3532	0.0254807	0.00103472	12.3533	0.0293192	0.00350506	12.3533	0.0319244	0.00256722
12.5108	0.00331743	0.000280002	12.5105	0.00645416	0.000475616	12.5107	0.00973121	0.000832039	12.5097	0.0130322	0.00104991	12.5108	0.0162317	0.000920493	12.5103	0.0189835	0.001851	12.5107	0.0223578	0.00128913	12.5105	0.0254902	0.00107101	12.5106	0.029397	0.00412884	12.5107	0.0319338	0.00268381
12.6682	0.00330259	0.000334811	12.6679	0.00648006	0.000544276	12.6681	0.00972901	0.000717335	12.667	0.0130734	0.000847715	12.6682	0.0162179	0.00113451	12.6676	0.0189447	0.00148592	12.6681	0.0223241	0.00116225	12.6679	0.0256669	0.001064	12.668	0.0295372	0.00416836	12.6681	0.0321073	0.00300078
12.8256	0.00331858	0.000278277	12.8252	0.0064656	0.000459792	12.8254	0.00973897	0.000628672	12.8244	0.013118	0.00100441	12.8256	0.0162534	0.00110223	12.825	0.0189809	0.0010075	12.8254	0.0223926	0.00122826	12.8252	0.0257013	0.00128284	12.8254	0.029349	0.00453845	12.8254	0.0320499	0.00304839
12.9829	0.00332049	0.000332318	12.9826	0.00644774	0.000490354	12.9828	0.00971085	0.000667707	12.9817	0.0131208	0.00105773	12.9829	0.0161754	0.00139886	12.9824	0.0190085	0.00171515	12.9828	0.0223662	0.00130402	12.9826	0.0256394	0.00109025	12.9827	0.0291441	0.00421199	12.9828	0.031975	0.00248846
13.1403	0.00331039	0.000252118	13.14	0.00643199	0.000481677	13.1402	0.00973862	0.000601743	13.1391	0.0130779	0.00111671	13.1403	0.016261	0.00109601	13.1397	0.0189524	0.00167488	13.1402	0.0223751	0.00145887	13.14	0.0256837	0.00115821	13.1401	0.0292613	0.00427376	13.1402	0.0320596	0.00314389
13.2977	0.0033136	0.000222952	13.2973	0.00647206	0.000428901	13.2975	0.00974449	0.000466635	13.2965	0.0130257	0.0014303	13.2977	0.0161673	0.00119544	13.2971	0.0190008	0.00165762	13.2975	0.0224115	0.00164127	13.2973	0.0257534	0.00157364	13.2975	0.0292583	0.00385636	13.2975	0.032016	0.00364691
13.455	0.00331777	0.000213976	13.4547	0.00649375	0.000411355	13.4549	0.00976018	0.000502199	13.4538	0.0130439	0.00151024	13.455	0.0162172	0.00121268	13.4545	0.0189089	0.00171134	13.4549	0.0223517	0.00166117	13.4547	0.0257436	0.00175729	13.4548	0.0294085	0.00365356	13.4549	0.0321027	0.0034939
13.6124	0.00329488	0.000217052	13.6121	0.00647134	0.000420513	13.6123	0.00975912	0.000623845	13.6112	0.0131146	0.00142031	13.6124	0.0162042	0.00113371	13.6118	0.018865	0.00143289	13.6123	0.022332	0.000979008	13.6121	0.0258383	0.00195406	13.6122	0.0293335	0.00361123	13.6123	0.0320868	0.00354991
13.7698	0.00330287	0.000224262	13.7694	0.00645507	0.000432623	13.7696	0.0097839	0.000685536	13.7685	0.0130792	0.00112525	13.7698	0.0161373	0.000903543	13.7692	0.0189792	0.00153188	13.7696	0.0222596	0.00108955	13.7694	0.0258067	0.00262814	13.7696	0.0295125	0.00368788	13.7696	0.0321032	0.00292992
13.9272	0.00326949	0.000193726	13.9268	0.00649749	0.000492095	13.927	0.00981808	0.000769727	13.9259	0.0130801	0.000874754	13.9271	0.0161522	0.00098716	13.9265	0.0190069	0.00143439	13.927	0.0222646	0.00080521	13.9268	0.0258264	0.00209852	13.9269	0.0294731	0.00366494	13.927	0.0319871	0.00261645
14.0845	0.00329196	0.00021328	14.0841	0.00649083	0.000486505	14.0844	0.0098188	0.000667397	14.0832	0.0130081	0.000971933	14.0845	0.0162068	0.00102509	14.0839	0.0189497	0.00147465	14.0844	0.0223968	0.00124159	14.0842	0.0258593	0.00243906	14.0843	0.0297009	0.00398507	14.0844	0.0319951	0.00314655
14.2419	0.00329487	0.000206631	14.2415	0.00652157	0.000500278	14.2417	0.00979841	0.000445402	14.2406	0.013086	0.00105799	14.2419	0.0162711	0.00113627	14.2413	0.0189685	0.00167428	14.2417	0.0224394	0.00123128	14.2415	0.0260544	0.00261326	14.2417	0.029471	0.00367781	14.2417	0.032012	0.00320715
14.3993	0.00330708	0.000248376	14.3989	0.00650256	0.000565491	14.3991	0.00981011	0.000576835	14.3979	0.0131353	0.00115031	14.3992	0.0162759	0.00127872	14.3986	0.0189859	0.00182095	14.3991	0.0225425	0.0014184	14.3989	0.0261194	0.00252444	14.399	0.0294286	0.00322761	14.3991	0.0320101	0.00290836
14.5566	0.00328835	0.000250599	14.5562	0.0064855	0.000466693	14.5565	0.00977324	0.000692385	14.5553	0.0130544	0.00100536	14.5566	0.016204	0.00104854	14.556	0.0189875	0.00178387	14.5565	0.0224903	0.00114231	14.5563	0.0260028	0.00240789	14.5564	0.0297032	0.00357452	14.5565	0.0318353	0.00295423
14.714	0.0033029	0.000236106	14.7136	0.00644321	0.000471232	14.7138	0.00974721	0.000771204	14.7126	0.013084	0.00117094	14.714	0.0162765	0.00136435	14.7133	0.0190276	0.00185977	14.7138	0.0223785	0.000974836	14.7136	0.0259033	0.00219201	14.7138	0.0295494	0.0030777	14.7138	0.0316765	0.00240246
14.8714	0.00330597	0.000146574	14.871	0.00641166	0.000521828	14.8712	0.00985235	0.000542972	14.87	0.0130405	0.00117828	14.8713	0.0162317	0.00112354	14.8707	0.0189929	0.00186432	14.8712	0.0225042	0.00162736	14.871	0.0259121	0.00221241	14.8711	0.0295073	0.00369479	14.8712	0.0316713	0.00260526
15.0287	0.003317	0.000198271	15.0283	0.00645511	0.000715105	15.0286	0.00983811	0.000556361	15.0274	0.0131397	0.00119429	15.0287	0.0162681	0.000932547	15.0281	0.0190137	0.00220153	15.0286	0.0226632	0.0016363	15.0284	0.0259225	0.00188099	15.0285	0.0294604	0.00387337	15.0286	0.0315884	0.00278765
15.1861	0.00331784	0.000225394	15.1857	0.00643955	0.000474448	15.1859	0.00987562	0.000610563	15.1847	0.0131461	0.00107098	15.1861	0.0162821	0.00101554	15.1854	0.0190272	0.00183635	15.1859	0.0225806	0.00166136	15.1857	0.0260263	0.00239701	15.1859	0.0294	0.00403061	15.1859	0.0317048	0.00261866
15.3435	0.00330274	0.000200132	15.3431	0.00644826	0.000553943	15.3433	0.00989891	0.000517369	15.3421	0.0132039	0.00122621	15.3435	0.016241	0.000749148	15.3428	0.0191096	0.0017618	15.3433	0.0224953	0.00153668	15.3431	0.0259697	0.00303284	15.3432	0.0291689	0.00347601	15.3433	0.0318231	0.00217612
15.5008	0.00330797	0.000201316	15.5004	0.00649572	0.000732472	15.5007	0.00987673	0.000502165	15.4994	0.0131216	0.00115813	15.5008	0.0162597	0.000994051	15.5002	0.0191389	0.00197798	15.5007	0.0225778	0.0015007	15.5005	0.0258657	0.00304591	15.5006	0.0290591	0.00343066	15.5007	0.0316903	0.00202634
15.6582	0.00330968	0.000274063	15.6578	0.00652349	0.000556714	15.658	0.00985697	0.000639094	15.6568	0.0130859	0.00106004	15.6582	0.0162594	0.000904131	15.6575	0.0192758	0.00210881	15.658	0.0226132	0.00161929	15.6578	0.0259315	0.00312245	15.658	0.0290901	0.00390524	15.658	0.0315919	0.00192445
15.8156	0.00332767	0.000287014	15.8152	0.00650259	0.000583998	15.8154	0.00989947	0.000775928	15.8141	0.0130053	0.00114877	15.8156	0.0162607	0.000786341	15.8149	0.0192969	0.00209427	15.8154	0.0224024	0.00130899	15.8152	0.0259757	0.00315672	15.8153	0.0291479	0.00358535	15.8154	0.031429	0.0020165
15.973	0.00333949	0.000277795	15.9725	0.00648343	0.000497462	15.9728	0.00988568	0.00075565	15.9715	0.0130155	0.000870126	15.9729	0.0163015	0.000454985	15.9722	0.0194472	0.00235781	15.9728	0.0224223	0.00138714	15.9725	0.0260322	0.00356531	15.9727	0.0291674	0.0037122	15.9728	0.0316168	0.00199823
16.1303	0.0033214	0.000247997	16.1299	0.00649016	0.000517492	16.1301	0.00988537	0.000739214	16.1288	0.0130497	0.000876762	16.1303	0.0163294	0.000891932	16.1296	0.0194036	0.00222424	16.1301	0.0224936	0.000825525	16.1299	0.0259634	0.00331074	16.1301	0.0289386	0.00306991	16.1301	0.0315366	0.00147577
16.2877	0.00333638	0.000281658	16.2873	0.00645966	0.000409358	16.2875	0.0098669	0.000730322	16.2862	0.0130682	0.000915232	16.2877	0.0162819	0.000707855	16.287	0.0194503	0.0020657	16.2875	0.0223492	0.00108354	16.2873	0.0258835	0.00305308	16.2874	0.0289105	0.00398363	16.2875	0.0316057	0.00199137
16.4451	0.00332477	0.000299436	16.4446	0.00645936	0.000478338	16.4449	0.00985687	0.000725014	16.4435	0.0129891	0.000684349	16.445	0.0162371	0.000503804	16.4443	0.0194076	0.00217493	16.4449	0.0224137	0.00159834	16.4446	0.0259059	0.00332854	16.4448	0.0287952	0.00310744	16.4449	0.0317007	0.00281177
16.6024	0.00331943	0.000304925	16.602	0.00646176	0.000283648	16.6022	0.00987667	0.000708206	16.6009	0.0129645	0.000820781	16.6024	0.0162869	0.000739047	16.6017	0.0195197	0.00264976	16.6022	0.0225926	0.00166196	16.602	0.0260085	0.00353738	16.6022	0.0288644	0.00320523	16.6022	0.0316641	0.00224121
16.7598	0.00332386	0.000301309	16.7593	0.00647814	0.000217838	16.7596	0.00987525	0.000666374	16.7583	0.0129248	0.000754691	16.7598	0.0162762	0.000822277	16.7591	0.0195521	0.00239508	16.7596	0.0225297	0.00133334	16.7594	0.0260546	0.0032139	16.7595	0.0287477	0.00294408	16.7596	0.0316244	0.00253357
16.9172	0.00330517	0.000296928	16.9167	0.00647744	0.000343152	16.917	0.00989262	0.000705292	16.9156	0.0130278	0.000993076	16.9171	0.0162452	0.000844788	16.9164	0.0194968	0.00238666	16.917	0.0225583	0.00135571	16.9167	0.0260028	0.00314808	16.9169	0.028755	0.00314673	16.917	0.0317101	0.00221288
17.0745	0.00331473	0.000263604	17.0741	0.00645386	0.000218485	17.0743	0.00989522	0.000652507	17.073	0.0130277	0.00108636	17.0745	0.0163136	0.000798108	17.0738	0.0194845	0.00194092	17.0743	0.0224368	0.00126059	17.0741	0.0261963	0.0031753	17.0743	0.0287829	0.0030011	17.0743	0.0317441	0.00219208
17.2319	0.00332089	0.000243731	17.2314	0.0064255	0.000112789	17.2317	0.00985862	0.000572104	17.2303	0.0130054	0.00110722	17.2319	0.0162656	0.00108232	17.2311	0.0194848	0.00225046	17.2317	0.0224898	0.000797353	17.2315	0.0260719	0.00353732	17.2316	0.0285609	0.00296118	17.2317	0.0315592	0.00210528
17.3893	0.00329896	0.000246095	17.3888	0.0064602	0.000213787	17.3891	0.00991657	0.000562671	17.3877	0.0130181	0.000949763	17.3892	0.0163808	0.00110768	17.3885	0.0194251	0.00171675	17.3891	0.0224369	0.00116708	17.3888	0.0258962	0.00333662	17.389	0.0284612	0.00271018	17.3891	0.0314962	0.00221297
17.5466	0.0033003	0.000241844	17.5462	0.0064608	0.000257682	17.5464	0.00987662	0.000566603	17.545	0.0130143	0.00110886	17.5466	0.0163473	0.000875538	17.5459	0.0195337	0.00190125	17.5464	0.022516	0.00132702	17.5462	0.0259339	0.00337411	17.5464	0.0286256	0.00301484	17.5464	0.0314649	0.00210353
17.704	0.00331258	0.000215711	17.7035	0.00644033	0.000329127	17.7038	0.0098937	0.000581953	17.7024	0.0130813	0.00108867	17.704	0.0163369	0.000846284	17.7032	0.0195244	0.00177329	17.7038	0.0223311	0.00120869	17.7036	0.0260605	0.00334171	17.7037	0.0288155	0.00325145	17.7038	0.03137	0.00181945
17.8614	0.00331246	0.000283059	17.8609	0.00650754	0.00036502	17.8612	0.00989504	0.000651901	17.8597	0.0131264	0.000998906	17.8614	0.0163086	0.000717487	17.8606	0.0194901	0.00197099	17.8612	0.0224479	0.000894914	17.8609	0.0261544	0.00294972	17.8611	0.0287623	0.00271236	17.8612	0.0314299	0.00226553
18.0188	0.00331489	0.000302908	18.0183	0.00647448	0.000335464	18.0186	0.00985129	0.0005815	18.0171	0.0130501	0.00108267	18.0187	0.0162522	0.00072137	18.0179	0.0194588	0.00190694	18.0186	0.0224988	0.00100973	18.0183	0.0262974	0.00325655	18.0185	0.0290121	0.00281752	18.0186	0.0315118	0.00218328
18.1761	0.00330339	0.000269117	18.1756	0.00647714	0.000134274	18.1759	0.00981666	0.00044618	18.1744	0.0130361	0.000982801	18.1761	0.0162392	0.000910418	18.1753	0.0193465	0.00150862	18.1759	0.0223799	0.000835993	18.1757	0.0262029	0.00305177	18.1758	0.0289056	0.0024624	18.1759	0.0316326	0.00243295
18.3335	0.00330169	0.000291803	18.333	0.00646099	8.54204e-05	18.3333	0.00985207	0.000462731	18.3318	0.0130526	0.00085829	18.3335	0.0163201	0.000856708	18.3327	0.0193097	0.00164459	18.3333	0.0223904	0.000996553	18.333	0.0262023	0.00263247	18.3332	0.0289225	0.00268346	18.3333	0.0317547	0.0022927
18.4909	0.0033006	0.00024111	18.4904	0.00648915	0.000152932	18.4907	0.00985936	0.000407257	18.4892	0.0130528	0.000843749	18.4908	0.0163238	0.0010742	18.49	0.0193037	0.00149615	18.4907	0.022342	0.000685234	18.4904	0.0262711	0.00301775	18.4906	0.0289004	0.00262972	18.4907	0.031651	0.00239137
18.6482	0.00331472	0.000253436	18.6477	0.00649405	0.000221917	18.648	0.00988046	0.000498892	18.6465	0.0130225	0.000805602	18.6482	0.0163908	0.00124915	18.6474	0.0194	0.00158844	18.648	0.0224533	0.000780374	18.6478	0.0262677	0.00341805	18.6479	0.0288006	0.00259786	18.648	0.031536	0.00344492
18.8056	0.00330126	0.0002347	18.8051	0.00649309	0.000267583	18.8054	0.00990413	0.000488789	18.8039	0.0130039	0.000806092	18.8056	0.0162764	0.000888809	18.8048	0.0193047	0.00168281	18.8054	0.0223808	0.000946179	18.8051	0.026299	0.00341549	18.8053	0.028826	0.00248574	18.8054	0.0315943	0.0034202
18.963	0.00329605	0.00019674	18.9625	0.00647332	0.000363084	18.9628	0.00988565	0.000467095	18.9612	0.0131068	0.000971092	18.9629	0.0162143	0.0008733	18.9621	0.0194869	0.00211906	18.9628	0.022261	0.000680904	18.9625	0.0263058	0.00273246	18.9627	0.0288676	0.00263504	18.9628	0.0315377	0.00331222
19.1203	0.00331924	0.000242991	19.1198	0.00649632	0.000329138	19.1201	0.00986273	0.000428238	19.1186	0.0129917	0.000818497	19.1203	0.0162512	0.00102979	19.1195	0.0194213	0.00175261	19.1201	0.0223159	0.00111622	19.1198	0.0261598	0.00293186	19.12	0.0288067	0.00237844	19.1201	0.0314155	0.00331405
19.2777	0.00328461	0.000179618	19.2772	0.0065122	0.000296726	19.2775	0.00983604	0.00052697	19.2759	0.0129443	0.000566857	19.2777	0.0162008	0.000953834	19.2768	0.0195273	0.00201857	19.2775	0.0223022	0.00105867	19.2772	0.0262133	0.00317687	19.2774	0.0286963	0.00227039	19.2775	0.0314813	0.00314162
19.4351	0.0033048	0.000199171	19.4345	0.00648835	0.000179413	19.4349	0.00980296	0.000605565	19.4333	0.0130156	0.000679801	19.435	0.0162578	0.00112903	19.4342	0.0194061	0.00180267	19.4349	0.0222023	0.00104113	19.4346	0.026145	0.00356389	19.4348	0.0286904	0.001473	19.4349	0.0314565	0.00272458
19.5924	0.00331148	0.000229448	19.5919	0.00651382	0.000263035	19.5922	0.00982948	0.000601226	19.5906	0.0129528	0.000549602	19.5924	0.0162008	0.000987295	19.5916	0.0193677	0.00179706	19.5922	0.0222622	0.000639711	19.5919	0.0261362	0.00281298	19.5921	0.0287741	0.00197926	19.5922	0.0317161	0.00299732
19.7498	0.00331398	0.00026015	19.7493	0.00649209	0.000239038	19.7496	0.00983094	0.000608314	19.748	0.0129232	0.000270307	19.7498	0.0162768	0.000837504	19.7489	0.0193557	0.00125816	19.7496	0.0222911	0.000993245	19.7493	0.0263223	0.00298702	19.7495	0.0287468	0.00223564	19.7496	0.0316221	0.00312009
19.9072	0.00331038	0.000213298	19.9066	0.00647169	0.000232187	19.907	0.00985785	0.000541948	19.9053	0.0129217	0.00040582	19.9071	0.016223	0.00063806	19.9063	0.0193278	0.00164455	19.907	0.0223975	0.00111155	19.9067	0.0262036	0.00293167	19.9069	0.0287685	0.00205721	19.907	0.0316747	0.00252691

## Sheet: T=0.7Tc,W=1.58kTc
y-coordinate, averaged density profile ρf*(y), and uncertainty of the averaged density profile Δρf*(y) of the adsorption isotherm for:
T / Tc = 0.7,
ρs / σf-3 = 1.07, and
Ϛ = 0.514.
The averaged density profiles are indicated with the respective bulk fluid pressure pfb / esf-3.
pfb / esf-3 =	0.002323(39)		pfb / esf-3 =	0.00446(9)		pfb / esf-3 =	0.00659(12)		pfb / esf-3 =	0.00847(11)		pfb / esf-3 =	0.01023(41)		pfb / esf-3 =	0.01176(25)		pfb / esf-3 =	0.001342(40)		pfb / esf-3 =	0.00146(8)
y / σf	ρf*(y) / σf-3	Δρf*(y) / σf-3	y / σf	ρf*(y) / σf-3	Δρf*(y) / σf-3	y / σf	ρf*(y) / σf-3	Δρf*(y) / σf-3	y / σf	ρf*(y) / σf-3	Δρf*(y) / σf-3	y / σf	ρf*(y) / σf-3	Δρf*(y) / σf-3	y / σf	ρf*(y) / σf-3	Δρf*(y) / σf-3	y / σf	ρf*(y) / σf-3	Δρf*(y) / σf-3	y / σf	ρf*(y) / σf-3	Δρf*(y) / σf-3
4.79975	1.51594e-06	5.26399e-06	4.79962	7.97215e-06	4.44731e-05	4.7997	2.76239e-06	8.17503e-06	4.79931	5.0024e-05	4.28598e-05	4.79975	4.36696e-05	9.0134e-05	4.79954	3.53835e-05	8.18349e-05	4.7997	8.28839e-05	0.000108655	4.79963	0	0
4.95712	1.36021e-06	4.59605e-06	4.95699	6.66289e-06	3.45229e-05	4.95707	2.79678e-06	8.57491e-06	4.95667	4.45447e-05	3.09479e-05	4.95712	3.53185e-05	3.78402e-05	4.9569	3.6489e-05	8.02588e-05	4.95707	7.45578e-05	5.78282e-05	4.957	0	0
5.11449	1.65832e-06	6.78672e-06	5.11435	3.04132e-06	9.71535e-06	5.11444	3.93587e-06	1.1603e-05	5.11402	4.40105e-05	2.68017e-05	5.11448	3.26398e-05	2.8378e-05	5.11427	2.96056e-05	4.25059e-05	5.11444	5.45728e-05	3.49534e-05	5.11436	0	0
5.27186	2.75973e-06	4.59893e-06	5.27172	5.86754e-06	3.68414e-06	5.2718	1.05897e-05	9.67738e-06	5.27138	4.91801e-05	1.18355e-05	5.27185	3.28032e-05	1.01932e-05	5.27163	3.4862e-05	2.24993e-05	5.2718	7.04531e-05	1.73065e-05	5.27173	1.91447e-05	4.4903e-06
5.42923	0.00153879	7.14519e-05	5.42908	0.0031846	0.000370822	5.42917	0.00494906	0.000494283	5.42873	0.00681471	0.000234981	5.42922	0.00899811	0.00063964	5.42899	0.01076	0.00104613	5.42917	0.0133267	0.00140455	5.42909	0.0177524	0.000468099
5.5866	0.0151731	0.000499148	5.58645	0.0315167	0.00408911	5.58654	0.0485742	0.00473104	5.58608	0.0669647	0.0021441	5.58659	0.0872549	0.00619325	5.58635	0.103953	0.0109078	5.58654	0.127285	0.0156282	5.58646	0.166587	0.00797419
5.74397	0.0254478	0.000820308	5.74381	0.052624	0.00728869	5.7439	0.0802533	0.00712239	5.74344	0.109572	0.00239301	5.74396	0.142357	0.00833505	5.74371	0.169388	0.014497	5.7439	0.204983	0.0227174	5.74382	0.26272	0.012941
5.90134	0.0154985	0.000373517	5.90118	0.0320924	0.00456281	5.90127	0.0488808	0.00325295	5.90079	0.066456	0.00133455	5.90133	0.0861732	0.00512012	5.90108	0.102758	0.00727102	5.90127	0.124828	0.0119576	5.90119	0.159293	0.00664984
6.05871	0.00850008	0.000279299	6.05854	0.0175645	0.0023036	6.05864	0.0268643	0.00167483	6.05815	0.0368314	0.000727584	6.0587	0.0477327	0.00305247	6.05844	0.0573339	0.00390416	6.05864	0.0700837	0.00532132	6.05855	0.0903215	0.00435387
6.21608	0.00573052	0.00024604	6.21591	0.0118033	0.00168338	6.21601	0.0181717	0.00105645	6.2155	0.0251154	0.000703822	6.21607	0.0329251	0.00256956	6.2158	0.0396288	0.00273417	6.21601	0.0491351	0.00371811	6.21592	0.0648643	0.00365135
6.37344	0.00453504	0.000251734	6.37327	0.0094094	0.00116116	6.37337	0.014619	0.00115364	6.37286	0.0203416	0.000777243	6.37343	0.0270717	0.00221013	6.37316	0.0329047	0.00202158	6.37337	0.0416031	0.00330933	6.37328	0.0578846	0.00298837
6.53081	0.00394852	0.000185813	6.53064	0.00827574	0.000975723	6.53074	0.0130415	0.000928455	6.53021	0.0184964	0.000746212	6.5308	0.0248654	0.00236113	6.53052	0.0308487	0.00224711	6.53074	0.0400384	0.00364097	6.53065	0.0610111	0.0017712
6.68818	0.00364033	0.000155372	6.688	0.00770468	0.000896673	6.68811	0.0122428	0.000939376	6.68757	0.0176576	0.000580269	6.68817	0.0238723	0.00208983	6.68789	0.030028	0.00245888	6.68811	0.039667	0.00417377	6.68801	0.0629173	0.00143355
6.84555	0.00346586	0.000201081	6.84537	0.0072805	0.0010344	6.84548	0.0115127	0.000763756	6.84492	0.0163967	0.000498956	6.84554	0.02218	0.00185333	6.84525	0.0275411	0.0019412	6.84548	0.0361092	0.00394849	6.84538	0.0562335	0.00175735
7.00292	0.00330557	0.000201395	7.00273	0.00688317	0.000831505	7.00284	0.0107936	0.000796192	7.00228	0.0149892	0.000609767	7.00291	0.0200571	0.00187707	7.00261	0.0244419	0.00117352	7.00284	0.0314429	0.0027417	7.00274	0.0471961	0.00291539
7.16029	0.00324161	0.000179186	7.1601	0.00666932	0.000671387	7.16021	0.0102684	0.000772794	7.15963	0.0139992	0.000579466	7.16028	0.0183885	0.00169145	7.15997	0.0222437	0.00107846	7.16021	0.0281351	0.00209853	7.16011	0.041136	0.00320537
7.31766	0.00322627	0.000133084	7.31746	0.00648348	0.00053874	7.31758	0.00996371	0.000784301	7.31698	0.0134615	0.000623239	7.31765	0.0173607	0.00151673	7.31733	0.0208869	0.000717919	7.31758	0.0262013	0.0022449	7.31747	0.0383674	0.00289238
7.47503	0.00321954	0.00020301	7.47483	0.0063543	0.000375802	7.47494	0.00978015	0.000649332	7.47434	0.0131664	0.000529973	7.47502	0.016797	0.00158788	7.4747	0.0200641	0.000448169	7.47494	0.0249194	0.00213073	7.47484	0.0375774	0.00314012
7.6324	0.00321332	0.000233625	7.63219	0.00631605	0.000435502	7.63231	0.00966591	0.000608583	7.63169	0.0129032	0.000571642	7.63238	0.0163947	0.00138598	7.63206	0.0196606	0.000675592	7.63231	0.0239426	0.00169743	7.6322	0.0365714	0.00332802
7.78977	0.0032261	0.000223733	7.78956	0.00628406	0.000573208	7.78968	0.00948087	0.000563371	7.78905	0.0127466	0.000518371	7.78975	0.0161247	0.00143789	7.78942	0.0191634	0.000515561	7.78968	0.0232672	0.00174302	7.78957	0.0346201	0.00324511
7.94713	0.0032052	0.000242961	7.94692	0.00628742	0.000653935	7.94705	0.00945656	0.000378469	7.9464	0.0126168	0.0004154	7.94712	0.0159976	0.00134145	7.94678	0.0187155	0.000585584	7.94705	0.0228218	0.00214839	7.94693	0.0326623	0.00274944
8.1045	0.00317888	0.000189609	8.10428	0.0062426	0.000643897	8.10441	0.00946663	0.00063707	8.10376	0.0125385	0.000512217	8.10449	0.0158744	0.00133182	8.10414	0.0184566	0.000234629	8.10441	0.0224805	0.00213683	8.1043	0.0312127	0.00256791
8.26187	0.00319294	0.000163229	8.26165	0.00626177	0.000688187	8.26178	0.009408	0.000490764	8.26111	0.0124363	0.000492877	8.26186	0.0157655	0.00135638	8.26151	0.0182696	0.000253722	8.26178	0.0220804	0.00203337	8.26166	0.0304692	0.00268963
8.41924	0.00319799	0.000165072	8.41901	0.00623336	0.00070437	8.41915	0.00937639	0.000441885	8.41847	0.0124219	0.000666513	8.41923	0.0156428	0.00142047	8.41887	0.0181699	0.000440158	8.41915	0.0217902	0.00157967	8.41903	0.0299588	0.00316226
8.57661	0.00317431	0.000234821	8.57638	0.00625227	0.000563552	8.57652	0.00941066	0.000710545	8.57582	0.0123015	0.000585978	8.5766	0.0155212	0.00116277	8.57623	0.0180352	0.00046035	8.57652	0.0216038	0.00160859	8.57639	0.0295098	0.00322277
8.73398	0.00317518	0.000194025	8.73374	0.00621673	0.000654274	8.73388	0.00937775	0.000774593	8.73317	0.0123151	0.000617182	8.73397	0.0153763	0.00133401	8.73359	0.0179264	0.00088225	8.73388	0.0214697	0.00161452	8.73376	0.0286632	0.0037291
8.89135	0.00318671	0.000210878	8.89111	0.00624959	0.000656364	8.89125	0.00936603	0.00076416	8.89053	0.012352	0.000601787	8.89133	0.0154217	0.00125467	8.89095	0.0179043	0.00101588	8.89125	0.0214063	0.00171169	8.89112	0.0279194	0.00307137
9.04872	0.00319497	0.00024409	9.04847	0.00628415	0.000621542	9.04862	0.00939035	0.000774263	9.04788	0.0123278	0.000669304	9.0487	0.0154618	0.00126957	9.04832	0.0179834	0.000872851	9.04862	0.0210828	0.00142981	9.04849	0.0272884	0.00277339
9.20609	0.00317427	0.00024886	9.20584	0.00630428	0.000581073	9.20598	0.00931759	0.000655692	9.20524	0.0123126	0.000801184	9.20607	0.0154436	0.00110712	9.20568	0.0180267	0.000492566	9.20598	0.0211278	0.00143281	9.20585	0.0268995	0.00288337
9.36346	0.00316653	0.000190378	9.3632	0.00631752	0.000580816	9.36335	0.0093095	0.000665626	9.36259	0.0123918	0.000658145	9.36344	0.0153816	0.00137459	9.36304	0.0179907	0.000547975	9.36335	0.0211718	0.00119646	9.36322	0.0264381	0.00285203
9.52082	0.00317343	0.000177102	9.52057	0.00627324	0.000568817	9.52072	0.00934022	0.000668638	9.51995	0.0123716	0.000767512	9.52081	0.0153727	0.0013813	9.5204	0.0178813	0.000408658	9.52072	0.021031	0.00126219	9.52058	0.0260629	0.00299617
9.67819	0.00318601	0.000237855	9.67793	0.00627431	0.000540562	9.67809	0.00935195	0.000661571	9.6773	0.0123666	0.000790325	9.67818	0.0154037	0.00136679	9.67776	0.0180237	0.000871588	9.67809	0.0211583	0.00139368	9.67795	0.0256981	0.00288362
9.83556	0.00318654	0.000248051	9.8353	0.00627389	0.000625108	9.83545	0.00936977	0.000662702	9.83466	0.0123484	0.000784417	9.83555	0.0154306	0.0013519	9.83513	0.017951	0.000756016	9.83545	0.021055	0.00145716	9.83531	0.0254218	0.00268803
9.99293	0.00317273	0.000241411	9.99266	0.00622964	0.000513845	9.99282	0.00939911	0.000834599	9.99201	0.0124479	0.000705814	9.99292	0.0154318	0.00132457	9.99249	0.0178795	0.000588323	9.99282	0.0210928	0.00143371	9.99268	0.0250613	0.00254858
10.1503	0.0031732	0.000205436	10.15	0.00620334	0.000463456	10.1502	0.00938388	0.00079226	10.1494	0.0124193	0.000598434	10.1503	0.0154023	0.00133822	10.1498	0.0178933	0.000412159	10.1502	0.0212528	0.0012794	10.15	0.0248096	0.00245504
10.3077	0.00319282	0.000271257	10.3074	0.00623911	0.000517897	10.3076	0.0093893	0.000831768	10.3067	0.0124378	0.000904573	10.3077	0.0154553	0.00134841	10.3072	0.0179097	0.000408723	10.3076	0.0211265	0.00133698	10.3074	0.0245855	0.00220332
10.465	0.00319253	0.000292767	10.4648	0.0062827	0.00067298	10.4649	0.00941607	0.00106652	10.4641	0.0122993	0.00053833	10.465	0.0154806	0.00149147	10.4646	0.0179756	0.000471327	10.4649	0.0212489	0.00146553	10.4648	0.0243488	0.00249859
10.6224	0.00318465	0.000257689	10.6221	0.00622538	0.000665854	10.6223	0.00935501	0.000840224	10.6214	0.0123272	0.000822561	10.6224	0.0154358	0.00162459	10.6219	0.0178492	0.000546055	10.6223	0.0212027	0.00130717	10.6221	0.0241261	0.00237927
10.7798	0.00319865	0.000229897	10.7795	0.00622942	0.000578088	10.7797	0.0093786	0.000900813	10.7788	0.0122743	0.000624184	10.7798	0.0154027	0.00146878	10.7793	0.0178566	0.00059008	10.7797	0.0212648	0.001278	10.7795	0.0241122	0.00223032
10.9371	0.00317976	0.000201488	10.9369	0.0062281	0.000535129	10.937	0.00938284	0.000859622	10.9361	0.0123215	0.000873284	10.9371	0.0153057	0.00128796	10.9367	0.0178881	0.000404698	10.937	0.021346	0.00135618	10.9369	0.0239785	0.00233693
11.0945	0.00318926	0.000186816	11.0942	0.00623541	0.000546303	11.0944	0.00945117	0.000953805	11.0935	0.0123079	0.000666545	11.0945	0.0153362	0.00157223	11.094	0.0180143	0.000287597	11.0944	0.021327	0.00156077	11.0942	0.0239684	0.0026243
11.2519	0.00317077	0.000125037	11.2516	0.00625153	0.00061471	11.2518	0.00946038	0.000851789	11.2508	0.0123904	0.000996318	11.2519	0.0154323	0.00137642	11.2514	0.0181325	0.000550372	11.2518	0.0212936	0.00168826	11.2516	0.0238817	0.00250306
11.4093	0.00317857	0.000150791	11.4089	0.00625425	0.000585919	11.4091	0.00938226	0.000747426	11.4082	0.0123425	0.000700093	11.4092	0.0154391	0.00143687	11.4087	0.0180353	0.000824994	11.4091	0.0213263	0.00160519	11.409	0.0237302	0.00255775
11.5666	0.00315664	0.000174823	11.5663	0.00626466	0.000589069	11.5665	0.00941311	0.00077788	11.5656	0.0123308	0.000623025	11.5666	0.0154415	0.00157912	11.5661	0.0181106	0.000915548	11.5665	0.0213033	0.00115724	11.5663	0.0236801	0.0021726
11.724	0.00318428	0.000143894	11.7237	0.00626566	0.000544621	11.7239	0.00940696	0.000800311	11.7229	0.0124193	0.000492127	11.724	0.0153986	0.00140265	11.7235	0.0182028	0.000996302	11.7239	0.0211338	0.00117887	11.7237	0.0237358	0.00228836
11.8814	0.0032062	0.000191846	11.881	0.00625033	0.000514788	11.8812	0.00930772	0.000607376	11.8803	0.01244	0.000745135	11.8813	0.0153915	0.0011507	11.8808	0.0181722	0.000678761	11.8812	0.0212993	0.00165028	11.8811	0.0234646	0.00215269
12.0387	0.00319794	0.000185714	12.0384	0.00622228	0.000449269	12.0386	0.00934367	0.000773851	12.0376	0.0123993	0.00083407	12.0387	0.0153632	0.001307	12.0382	0.0181036	0.000975765	12.0386	0.0211648	0.00116856	12.0384	0.0235609	0.0024967
12.1961	0.00320035	0.000173965	12.1958	0.00625313	0.000488334	12.196	0.00939087	0.000839308	12.195	0.0124655	0.000552973	12.1961	0.0154478	0.00161955	12.1956	0.0181586	0.000665596	12.196	0.0211002	0.0010825	12.1958	0.0234852	0.00244919
12.3535	0.00319446	0.000203375	12.3531	0.00624157	0.00038305	12.3533	0.00938969	0.000809732	12.3523	0.0124643	0.000832777	12.3534	0.0154675	0.00163919	12.3529	0.018079	0.000210118	12.3533	0.0211331	0.00110505	12.3532	0.0236031	0.00241122
12.5108	0.00318433	0.00013887	12.5105	0.00624477	0.000521279	12.5107	0.00934444	0.000726767	12.5097	0.0124272	0.000863071	12.5108	0.0154197	0.00148631	12.5103	0.0181717	0.000871651	12.5107	0.0210683	0.00109478	12.5105	0.0235327	0.00189135
12.6682	0.0031889	0.000164189	12.6679	0.00626075	0.00053597	12.6681	0.00933732	0.000661206	12.667	0.0124264	0.000918623	12.6682	0.015454	0.00183264	12.6676	0.018181	0.00112557	12.6681	0.0211103	0.00133021	12.6679	0.023502	0.00160733
12.8256	0.00319383	0.000233367	12.8252	0.00627315	0.000508713	12.8254	0.00934823	0.000797103	12.8244	0.0124718	0.000831865	12.8256	0.0154232	0.00158544	12.825	0.0180965	0.00101627	12.8254	0.0211382	0.00143358	12.8252	0.0233648	0.00158366
12.9829	0.00319779	0.000226395	12.9826	0.00626618	0.000488428	12.9828	0.00933424	0.000780189	12.9817	0.0124547	0.000761515	12.9829	0.0154541	0.00171162	12.9824	0.0181561	0.000944614	12.9828	0.0210828	0.00158425	12.9826	0.0235072	0.0021405
13.1403	0.00320365	0.000248381	13.14	0.00630911	0.000524504	13.1402	0.00932831	0.000590421	13.1391	0.0124742	0.000760746	13.1403	0.0155596	0.00188407	13.1397	0.0181659	0.00102712	13.1402	0.0211566	0.00166416	13.14	0.0236181	0.00264963
13.2977	0.00321102	0.000258686	13.2973	0.00629153	0.000461991	13.2975	0.00932627	0.000574102	13.2965	0.0125383	0.000928926	13.2977	0.0157021	0.00181922	13.2971	0.0181428	0.000994353	13.2975	0.0211082	0.00184278	13.2973	0.0234426	0.0019751
13.455	0.0032245	0.00032057	13.4547	0.0062644	0.000496844	13.4549	0.00939146	0.000681203	13.4538	0.0125044	0.000818536	13.455	0.0156858	0.00196787	13.4545	0.0180178	0.000699412	13.4549	0.0210252	0.00165977	13.4547	0.023402	0.00199931
13.6124	0.00324051	0.0003036	13.6121	0.00627462	0.00050985	13.6123	0.00935397	0.000797922	13.6112	0.0124819	0.000720912	13.6124	0.0156342	0.00171093	13.6118	0.0180866	0.000932962	13.6123	0.0209405	0.00153836	13.6121	0.0233662	0.00199483
13.7698	0.00322078	0.000277443	13.7694	0.00629985	0.000562529	13.7696	0.00941584	0.000789651	13.7685	0.0124635	0.000882578	13.7698	0.0156594	0.00171867	13.7692	0.0182064	0.00103559	13.7696	0.0209672	0.00138273	13.7694	0.0234281	0.00207195
13.9272	0.00323668	0.000256772	13.9268	0.0063292	0.000616335	13.927	0.0093872	0.000609574	13.9259	0.012467	0.00107967	13.9271	0.0155723	0.00151824	13.9265	0.0181079	0.000933121	13.927	0.0210112	0.00195841	13.9268	0.0234549	0.0021694
14.0845	0.00323084	0.0002188	14.0841	0.00627644	0.000568025	14.0844	0.00941356	0.000830815	14.0832	0.0124614	0.000919928	14.0845	0.015538	0.00165676	14.0839	0.0180508	0.000773019	14.0844	0.0210342	0.00183417	14.0842	0.02353	0.00265926
14.2419	0.0032326	0.000236008	14.2415	0.00630318	0.000508267	14.2417	0.00944219	0.000840295	14.2406	0.0124732	0.0010337	14.2419	0.0154694	0.00179864	14.2413	0.0180219	0.000972365	14.2417	0.0209693	0.00170873	14.2415	0.0235748	0.00240579
14.3993	0.00324356	0.000288934	14.3989	0.00627775	0.000546675	14.3991	0.00946936	0.000899297	14.3979	0.012545	0.000955395	14.3992	0.0154618	0.00158128	14.3986	0.0180823	0.000857831	14.3991	0.0211061	0.00192402	14.3989	0.023558	0.00236378
14.5566	0.00321555	0.00029104	14.5562	0.0062792	0.000464774	14.5565	0.00947165	0.000866779	14.5553	0.0124925	0.00108002	14.5566	0.0154644	0.00137157	14.556	0.0180641	0.000845416	14.5565	0.0212244	0.00208268	14.5563	0.0236814	0.00259921
14.714	0.00322527	0.000272239	14.7136	0.00629297	0.000418204	14.7138	0.0094859	0.000814986	14.7126	0.012473	0.00125438	14.714	0.0154685	0.00158343	14.7133	0.0180653	0.00114518	14.7138	0.021186	0.00209689	14.7136	0.0235796	0.00223892
14.8714	0.00322883	0.000240427	14.871	0.0062971	0.000365865	14.8712	0.00942359	0.000775148	14.87	0.0125414	0.00118143	14.8713	0.0154561	0.00167527	14.8707	0.0180381	0.00141986	14.8712	0.0211997	0.00187416	14.871	0.0237715	0.00270866
15.0287	0.00320489	0.000274857	15.0283	0.0062964	0.000418177	15.0286	0.00947011	0.000806704	15.0274	0.0124319	0.00124679	15.0287	0.0153745	0.00143657	15.0281	0.0180334	0.00137029	15.0286	0.0212585	0.00183935	15.0284	0.0237635	0.00227997
15.1861	0.00321941	0.000249751	15.1857	0.0063255	0.000489847	15.1859	0.00949367	0.000663385	15.1847	0.0124414	0.0010562	15.1861	0.0154932	0.00147759	15.1854	0.0181672	0.00108547	15.1859	0.0213462	0.00167098	15.1857	0.0239334	0.00285722
15.3435	0.00320749	0.000200209	15.3431	0.00633057	0.000450328	15.3433	0.00949763	0.000598356	15.3421	0.0124711	0.0011677	15.3435	0.0154978	0.00163785	15.3428	0.0182569	0.0012783	15.3433	0.021346	0.00172536	15.3431	0.0240121	0.00292081
15.5008	0.00320827	0.000286753	15.5004	0.00629932	0.000511255	15.5007	0.00950151	0.000540651	15.4994	0.0123727	0.000970207	15.5008	0.0154372	0.00147968	15.5002	0.0181254	0.000812362	15.5007	0.0213177	0.00175873	15.5005	0.0239601	0.00234758
15.6582	0.00323547	0.000280056	15.6578	0.00629107	0.000437209	15.658	0.0094952	0.000671208	15.6568	0.012377	0.00095984	15.6582	0.015325	0.00144578	15.6575	0.0181522	0.00135081	15.658	0.0212289	0.00180792	15.6578	0.0240893	0.00232034
15.8156	0.00322136	0.000237646	15.8152	0.0062769	0.000346865	15.8154	0.00951125	0.000791167	15.8141	0.0124497	0.000837859	15.8156	0.0154233	0.00135942	15.8149	0.0182338	0.00111055	15.8154	0.0213702	0.00201331	15.8152	0.0240909	0.00232514
15.973	0.00319535	0.000219137	15.9725	0.00622352	0.000395718	15.9728	0.00954721	0.00071945	15.9715	0.0124175	0.000615592	15.9729	0.0154811	0.00159392	15.9722	0.0181222	0.0010733	15.9728	0.0213767	0.00158171	15.9725	0.0240713	0.00232746
16.1303	0.00319267	0.000186382	16.1299	0.00625745	0.00045563	16.1301	0.00950978	0.000679034	16.1288	0.0123758	0.000585982	16.1303	0.0154367	0.00155224	16.1296	0.0182021	0.00139292	16.1301	0.0213693	0.00173094	16.1299	0.0241309	0.00228346
16.2877	0.00320086	0.000233203	16.2873	0.00626134	0.000559986	16.2875	0.00951838	0.000541337	16.2862	0.0123839	0.000664894	16.2877	0.0154076	0.00119389	16.287	0.0181277	0.000934761	16.2875	0.0214223	0.00210912	16.2873	0.0241154	0.00232962
16.4451	0.00319835	0.000278477	16.4446	0.00626478	0.000407778	16.4449	0.00956306	0.000712821	16.4435	0.0123984	0.00102814	16.445	0.0153277	0.00127338	16.4443	0.0180959	0.000933309	16.4449	0.0214125	0.0022344	16.4446	0.0241048	0.00197224
16.6024	0.00321489	0.000256679	16.602	0.00627131	0.000557322	16.6022	0.00954506	0.000687611	16.6009	0.0123745	0.000653775	16.6024	0.0153661	0.00132328	16.6017	0.018051	0.000961915	16.6022	0.0214294	0.00239367	16.602	0.0240276	0.00195875
16.7598	0.00320021	0.000249932	16.7593	0.00625976	0.000469959	16.7596	0.00954945	0.000621017	16.7583	0.0123061	0.000573299	16.7598	0.015346	0.00135526	16.7591	0.0181123	0.000640633	16.7596	0.021421	0.00230173	16.7594	0.0240179	0.00215521
16.9172	0.00320014	0.000303238	16.9167	0.00627851	0.000445827	16.917	0.00949726	0.000372244	16.9156	0.0123384	0.000387249	16.9171	0.0153139	0.00113357	16.9164	0.018093	0.00082144	16.917	0.0212638	0.00208765	16.9167	0.0241249	0.00206211
17.0745	0.00318461	0.000210221	17.0741	0.00624788	0.000315766	17.0743	0.00950432	0.000381774	17.073	0.0123903	0.00058627	17.0745	0.0153841	0.00148344	17.0738	0.0181867	0.000827351	17.0743	0.0213181	0.00160914	17.0741	0.0240002	0.00195585
17.2319	0.0032049	0.000263985	17.2314	0.00627063	0.000341072	17.2317	0.00950108	0.000432608	17.2303	0.0124221	0.00062046	17.2319	0.0153863	0.0014487	17.2311	0.0181012	0.00108692	17.2317	0.0213023	0.00184575	17.2315	0.0240473	0.00198646
17.3893	0.00320253	0.000261986	17.3888	0.00629568	0.000378321	17.3891	0.00944818	0.000503546	17.3877	0.0123718	0.000384769	17.3892	0.0153221	0.00131278	17.3885	0.0180318	0.000976073	17.3891	0.0214462	0.00193946	17.3888	0.0241113	0.00200253
17.5466	0.00319743	0.000338264	17.5462	0.00629274	0.000429905	17.5464	0.0094829	0.000400154	17.545	0.0124266	0.000695418	17.5466	0.0153687	0.00111063	17.5459	0.0180457	0.00099028	17.5464	0.0212921	0.00206117	17.5462	0.0240647	0.00160619
17.704	0.00318274	0.000322893	17.7035	0.00629014	0.000467725	17.7038	0.00943512	0.000434672	17.7024	0.0123892	0.000577154	17.704	0.0153804	0.00109702	17.7032	0.0181729	0.000969444	17.7038	0.0213986	0.00188743	17.7036	0.0240839	0.00190437
17.8614	0.00320064	0.000249223	17.8609	0.0062329	0.000343915	17.8612	0.00947426	0.000537157	17.8597	0.0124371	0.000720794	17.8614	0.015451	0.00136903	17.8606	0.0181335	0.000763073	17.8612	0.0214416	0.00207601	17.8609	0.024001	0.00112414
18.0188	0.00320757	0.000249093	18.0183	0.00626496	0.000456761	18.0186	0.00947874	0.000407515	18.0171	0.0124302	0.000737198	18.0187	0.0155686	0.00156148	18.0179	0.018174	0.00065333	18.0186	0.0215025	0.00192289	18.0183	0.0239443	0.0011466
18.1761	0.00321724	0.00026042	18.1756	0.006248	0.000260224	18.1759	0.00942392	0.000360552	18.1744	0.0123675	0.000805557	18.1761	0.0155919	0.00156609	18.1753	0.0182952	0.000677249	18.1759	0.0215575	0.00175214	18.1757	0.0240083	0.000744041
18.3335	0.00323306	0.000161973	18.333	0.0062371	0.000331026	18.3333	0.00947471	0.000506272	18.3318	0.0124267	0.00062144	18.3335	0.0155738	0.00143137	18.3327	0.0183117	0.000720109	18.3333	0.0214771	0.00166618	18.333	0.0239975	0.00117722
18.4909	0.00319546	0.000173152	18.4904	0.00622225	0.000360751	18.4907	0.00946245	0.000508936	18.4892	0.0123839	0.00059111	18.4908	0.0155238	0.00118306	18.49	0.0182381	0.000555094	18.4907	0.0214472	0.00149068	18.4904	0.0240681	0.00163799
18.6482	0.00319884	0.000182287	18.6477	0.00620195	0.000303492	18.648	0.00947114	0.000508399	18.6465	0.0124553	0.000576694	18.6482	0.0154689	0.000993793	18.6474	0.0182162	0.000685753	18.648	0.0213644	0.00177355	18.6478	0.0239257	0.00213535
18.8056	0.00318235	0.000177997	18.8051	0.00619779	0.000377157	18.8054	0.00947686	0.000330872	18.8039	0.0124444	0.000431215	18.8056	0.0154808	0.00123553	18.8048	0.0182857	0.000735127	18.8054	0.0215194	0.00181986	18.8051	0.0240077	0.00212748
18.963	0.003201	0.000234663	18.9625	0.006215	0.0002776	18.9628	0.0094491	0.00052628	18.9612	0.0123813	0.000485325	18.9629	0.0154228	0.0011395	18.9621	0.0181896	0.000636012	18.9628	0.0214721	0.00177847	18.9625	0.0241564	0.00219072
19.1203	0.0032044	0.000279804	19.1198	0.00622768	0.000329878	19.1201	0.00947873	0.000660008	19.1186	0.0123415	0.000593923	19.1203	0.0155039	0.00112747	19.1195	0.0183157	0.000748663	19.1201	0.0213795	0.001586	19.1198	0.0241175	0.00186968
19.2777	0.00320036	0.000288139	19.2772	0.00618573	0.000241467	19.2775	0.00950524	0.000502502	19.2759	0.0123792	0.000561326	19.2777	0.0153801	0.00117287	19.2768	0.0182204	0.000819848	19.2775	0.0213981	0.00194118	19.2772	0.0241525	0.00209761
19.4351	0.00320052	0.000227032	19.4345	0.00621902	0.000257687	19.4349	0.00948671	0.00047622	19.4333	0.0124552	0.000518671	19.435	0.0153791	0.00110444	19.4342	0.0183418	0.000845081	19.4349	0.0213831	0.00185361	19.4346	0.0240192	0.00230697
19.5924	0.00321789	0.000230087	19.5919	0.00621194	0.000255472	19.5922	0.00951585	0.000389789	19.5906	0.012354	0.000559667	19.5924	0.0154543	0.00141134	19.5916	0.018287	0.000815724	19.5922	0.0214087	0.00143222	19.5919	0.0240332	0.00216103
19.7498	0.00322968	0.00025074	19.7493	0.0062008	0.000289905	19.7496	0.00952922	0.000461857	19.748	0.012397	0.000814837	19.7498	0.0154912	0.00127596	19.7489	0.0180998	0.000897847	19.7496	0.0213702	0.00160676	19.7493	0.0239853	0.00225335
19.9072	0.00322639	0.000199456	19.9066	0.00622956	0.000276417	19.907	0.00948653	0.000538398	19.9053	0.0123153	0.000675024	19.9071	0.0155406	0.00149013	19.9063	0.0182473	0.00111906	19.907	0.0213502	0.00170781	19.9067	0.0239598	0.00169532

## Sheet: T=0.7Tc,W=2.00kTc
y-coordinate, averaged density profile ρf*(y), and uncertainty of the averaged density profile Δρf*(y) of the adsorption isotherm for:
T / Tc = 0.7,
ρs / σf-3 = 1.07, and
Ϛ = 0.65.
The averaged density profiles are indicated with the respective bulk fluid pressure pfb / esf-3.
pfb / esf-3 =	0.002213(31)		pfb / esf-3 =	0.00423(9)		pfb / esf-3 =	0.00618(22)		pfb / esf-3 =	0.00791(16)		pfb / esf-3 =	0.00951(13)		pfb / esf-3 =	0.01073(11)		pfb / esf-3 =	0.01147(22)
y / σf	ρf*(y) / σf-3	Δρf*(y) / σf-3	y / σf	ρf*(y) / σf-3	Δρf*(y) / σf-3	y / σf	ρf*(y) / σf-3	Δρf*(y) / σf-3	y / σf	ρf*(y) / σf-3	Δρf*(y) / σf-3	y / σf	ρf*(y) / σf-3	Δρf*(y) / σf-3	y / σf	ρf*(y) / σf-3	Δρf*(y) / σf-3	y / σf	ρf*(y) / σf-3	Δρf*(y) / σf-3
4.79975	2.50259e-05	6.55911e-05	4.79962	2.06132e-05	5.79385e-05	4.7997	0	0	4.79931	0	0	4.79975	0	0	4.79954	9.36431e-05	0.000126493	4.7997	0	0
4.95712	2.35176e-05	5.66554e-05	4.95699	1.79383e-05	3.17755e-05	4.95707	0	0	4.95667	0	0	4.95712	0	0	4.9569	4.07464e-05	6.5205e-05	4.95707	0	0
5.11449	1.18465e-05	2.47256e-05	5.11435	1.10742e-05	1.8665e-05	5.11444	0	0	5.11402	0	0	5.11448	0	0	5.11427	2.57257e-05	2.30914e-05	5.11444	0	0
5.27186	9.19331e-06	1.20837e-05	5.27172	1.15909e-05	1.17243e-05	5.2718	3.90283e-06	1.66038e-06	5.27138	5.07325e-06	1.56e-06	5.27185	7.16389e-06	2.63465e-06	5.27163	3.08014e-05	2.43678e-05	5.2718	1.51426e-05	3.40841e-06
5.42923	0.00274416	0.00011535	5.42908	0.00584724	0.000438387	5.42917	0.0096775	0.00159655	5.42873	0.0136846	0.000449956	5.42922	0.019631	0.00113496	5.42899	0.0252322	0.00145507	5.42917	0.0400624	0.00426844
5.5866	0.0292012	0.000955622	5.58645	0.0620096	0.00479999	5.58654	0.100621	0.0171139	5.58608	0.142424	0.00272024	5.58659	0.198682	0.00995959	5.58635	0.25078	0.0132377	5.58654	0.381584	0.0353773
5.74397	0.0447972	0.00220968	5.74381	0.0934756	0.0046518	5.7439	0.150927	0.0237052	5.74344	0.210226	0.00507043	5.74396	0.286585	0.0139725	5.74371	0.35711	0.0168289	5.7439	0.516462	0.0403156
5.90134	0.0235298	0.0015146	5.90118	0.0487761	0.00195123	5.90127	0.078548	0.010379	5.90079	0.109137	0.0029718	5.90133	0.147732	0.00741875	5.90108	0.183331	0.00899202	5.90127	0.259226	0.0174332
6.05871	0.0109617	0.000878631	6.05854	0.0228974	0.000918652	6.05864	0.0371049	0.00450493	6.05815	0.0517975	0.00161897	6.0587	0.0708755	0.00356423	6.05844	0.0890582	0.00537757	6.05864	0.12756	0.00842887
6.21608	0.00665641	0.000616302	6.21591	0.0139577	0.000512676	6.21601	0.0228643	0.00298524	6.2155	0.032407	0.00130935	6.21607	0.0452212	0.00246927	6.2158	0.0578347	0.00343677	6.21601	0.0866169	0.00628923
6.37344	0.00495026	0.000488223	6.37327	0.0105296	0.000474416	6.37337	0.0175812	0.00235552	6.37286	0.0254452	0.000924832	6.37343	0.0368583	0.00227687	6.37316	0.0487261	0.00380915	6.37337	0.0808203	0.00803151
6.53081	0.0041872	0.000483484	6.53064	0.00908524	0.00060393	6.53074	0.0155749	0.00216529	6.53021	0.0233225	0.000930761	6.5308	0.0355915	0.00278804	6.53052	0.0494867	0.0046807	6.53074	0.0953606	0.012603
6.68818	0.00379875	0.000349392	6.688	0.00830521	0.000435998	6.68811	0.0144134	0.00191538	6.68757	0.0219674	0.00086965	6.68817	0.0342385	0.00294493	6.68789	0.048614	0.0052593	6.68811	0.0974034	0.0133813
6.84555	0.00354176	0.00033063	6.84537	0.00759505	0.000388075	6.84548	0.0129174	0.00175013	6.84492	0.0193285	0.00106196	6.84554	0.0292208	0.00184771	6.84525	0.040533	0.00369843	6.84548	0.0763144	0.00947976
7.00292	0.00334963	0.000306675	7.00273	0.0069632	0.000393577	7.00284	0.0114636	0.00137775	7.00228	0.0165252	0.000643328	7.00291	0.0239191	0.00127853	7.00261	0.031882	0.00278416	7.00284	0.0555701	0.00609314
7.16029	0.00322888	0.000281176	7.1601	0.00654563	0.000323197	7.16021	0.0104979	0.00107792	7.15963	0.0146031	0.000636358	7.16028	0.0205046	0.000950638	7.15997	0.0263381	0.00217077	7.16021	0.0435447	0.00508451
7.31766	0.00317312	0.000243365	7.31746	0.00633491	0.000441985	7.31758	0.00988214	0.000755267	7.31698	0.0136087	0.000584275	7.31765	0.0186143	0.000963035	7.31733	0.023243	0.00183716	7.31758	0.0377095	0.0044212
7.47503	0.00313224	0.000216855	7.47483	0.00623013	0.000402279	7.47494	0.00954649	0.000760724	7.47434	0.0129184	0.000681057	7.47502	0.0174587	0.000663943	7.4747	0.0214233	0.00133612	7.47494	0.0346814	0.00373379
7.6324	0.00309625	0.000237028	7.63219	0.00616589	0.000495901	7.63231	0.00934036	0.000717432	7.63169	0.0125349	0.00073173	7.63238	0.0166304	0.000528652	7.63206	0.0201898	0.00153707	7.63231	0.0320994	0.00377042
7.78977	0.00309196	0.000270163	7.78956	0.00608479	0.000387808	7.78968	0.00921535	0.000781178	7.78905	0.01232	0.000634779	7.78975	0.0159736	0.000648633	7.78942	0.0192309	0.000973312	7.78968	0.0287581	0.00298116
7.94713	0.00307307	0.000281975	7.94692	0.00608939	0.000370155	7.94705	0.00908978	0.000723817	7.9464	0.0121725	0.000552843	7.94712	0.0155183	0.000702734	7.94678	0.0183925	0.000702057	7.94705	0.0257267	0.00247316
8.1045	0.00310177	0.00024959	8.10428	0.00603278	0.000242308	8.10441	0.00899809	0.000722448	8.10376	0.0120262	0.000756322	8.10449	0.0151143	0.000536408	8.10414	0.0176469	0.00109751	8.10441	0.0236328	0.00203247
8.26187	0.0030996	0.000213525	8.26165	0.00599931	0.000340306	8.26178	0.0089759	0.000828166	8.26111	0.011918	0.000644955	8.26186	0.014852	0.000588831	8.26151	0.0172285	0.000994763	8.26178	0.0222116	0.00190215
8.41924	0.00307817	0.000217704	8.41901	0.00596415	0.000365144	8.41915	0.00898078	0.000856933	8.41847	0.0118103	0.00054593	8.41923	0.0146729	0.000660004	8.41887	0.016883	0.000630922	8.41915	0.0212769	0.00191884
8.57661	0.00306702	0.000223712	8.57638	0.00593839	0.000306688	8.57652	0.00899433	0.000781868	8.57582	0.0118257	0.000650991	8.5766	0.0145657	0.000853156	8.57623	0.0165863	0.000867984	8.57652	0.0206174	0.00143404
8.73398	0.00308742	0.000265622	8.73374	0.00594094	0.000371067	8.73388	0.00896966	0.000576385	8.73317	0.0117736	0.000644203	8.73397	0.0145076	0.000420598	8.73359	0.0166874	0.00069057	8.73388	0.0200425	0.00194499
8.89135	0.00306912	0.000252989	8.89111	0.00596107	0.000435301	8.89125	0.00898922	0.000764582	8.89053	0.0118453	0.000698463	8.89133	0.014493	0.000315571	8.89095	0.0166076	0.00098086	8.89125	0.0196655	0.00195991
9.04872	0.00306145	0.000270663	9.04847	0.00599672	0.000468628	9.04862	0.00904382	0.000656369	9.04788	0.0118061	0.00061977	9.0487	0.0143903	0.000550306	9.04832	0.0164069	0.000799113	9.04862	0.0193505	0.00169879
9.20609	0.00307939	0.000230265	9.20584	0.00595844	0.000468672	9.20598	0.00904438	0.000633649	9.20524	0.0118475	0.000785529	9.20607	0.0143999	0.000644724	9.20568	0.0162797	0.000861639	9.20598	0.019145	0.00183182
9.36346	0.00309864	0.000295729	9.3632	0.00597021	0.000581894	9.36335	0.00897781	0.000669989	9.36259	0.0118255	0.000743639	9.36344	0.0143646	0.000704987	9.36304	0.0160956	0.000612871	9.36335	0.0188873	0.0018149
9.52082	0.00307007	0.000264033	9.52057	0.00601803	0.000618719	9.52072	0.00895491	0.000704945	9.51995	0.0117565	0.000550493	9.52081	0.0143162	0.000882259	9.5204	0.0161197	0.000589299	9.52072	0.0188634	0.00207076
9.67819	0.00307546	0.000334583	9.67793	0.00599205	0.00057062	9.67809	0.008927	0.000769075	9.6773	0.0117423	0.000359046	9.67818	0.0143271	0.000517849	9.67776	0.0161294	0.000788638	9.67809	0.018646	0.00177607
9.83556	0.00308027	0.000309742	9.8353	0.00602231	0.000562898	9.83545	0.00894944	0.00079339	9.83466	0.0117753	0.000340444	9.83555	0.0145021	0.000492807	9.83513	0.0161379	0.000463449	9.83545	0.0185077	0.00190045
9.99293	0.00306575	0.000227646	9.99266	0.00603132	0.000516893	9.99282	0.00891616	0.000755147	9.99201	0.0116921	0.000585162	9.99292	0.0144401	0.000417591	9.99249	0.0162115	0.000449979	9.99282	0.0184366	0.00203984
10.1503	0.00309734	0.000324578	10.15	0.00603331	0.000616492	10.1502	0.00896242	0.000637927	10.1494	0.0116942	0.000462878	10.1503	0.0144341	0.000527849	10.1498	0.0161537	0.000927886	10.1502	0.0183385	0.001997
10.3077	0.00307778	0.000243246	10.3074	0.00599487	0.000618974	10.3076	0.00900819	0.000646401	10.3067	0.0116883	0.000428492	10.3077	0.0144293	0.000766866	10.3072	0.016245	0.000747783	10.3076	0.0182565	0.00218422
10.465	0.00310309	0.000208225	10.4648	0.0059883	0.000482232	10.4649	0.00899084	0.000753859	10.4641	0.0116809	0.000370109	10.465	0.0144324	0.000658092	10.4646	0.0162538	0.000799681	10.4649	0.0183078	0.00216604
10.6224	0.00309337	0.000290906	10.6221	0.00600975	0.00057132	10.6223	0.00897829	0.000623907	10.6214	0.011703	0.000330943	10.6224	0.0144131	0.000475505	10.6219	0.0163833	0.000714322	10.6223	0.0183052	0.00202637
10.7798	0.00309632	0.000301883	10.7795	0.00596468	0.000560389	10.7797	0.00897619	0.000731182	10.7788	0.0116184	0.000507205	10.7798	0.0144162	0.000536521	10.7793	0.0163407	0.000508081	10.7797	0.0182991	0.00214538
10.9371	0.0030929	0.000330934	10.9369	0.0059596	0.000521057	10.937	0.00892014	0.000669632	10.9361	0.0116623	0.000392514	10.9371	0.0144666	0.000518525	10.9367	0.0163335	0.000557231	10.937	0.0182717	0.00200476
11.0945	0.00311931	0.000287067	11.0942	0.00598293	0.00050979	11.0944	0.00894041	0.000721488	11.0935	0.0115904	0.000422668	11.0945	0.0143469	0.00070439	11.094	0.0163703	0.000825611	11.0944	0.0181833	0.00183794
11.2519	0.00311302	0.000269658	11.2516	0.00599861	0.0006101	11.2518	0.00898318	0.000560877	11.2508	0.011527	0.000177412	11.2519	0.0143676	0.000746347	11.2514	0.0164764	0.000819227	11.2518	0.0180903	0.00192932
11.4093	0.00310741	0.00025375	11.4089	0.00600079	0.000679963	11.4091	0.00893641	0.000466702	11.4082	0.0114968	0.000267342	11.4092	0.0143449	0.000447711	11.4087	0.016456	0.000710415	11.4091	0.018182	0.00216762
11.5666	0.00309449	0.00028023	11.5663	0.00599765	0.000618801	11.5665	0.00896689	0.000630335	11.5656	0.0115146	0.000412935	11.5666	0.0143113	0.000418156	11.5661	0.0162385	0.000571705	11.5665	0.0183849	0.00217887
11.724	0.00310025	0.000224759	11.7237	0.00603125	0.000770637	11.7239	0.00890744	0.000266126	11.7229	0.0116059	0.000299875	11.724	0.0143951	0.00056724	11.7235	0.016307	0.000887674	11.7239	0.0182884	0.00257075
11.8814	0.00310352	0.000230541	11.881	0.00599028	0.000668222	11.8812	0.00895822	0.000521182	11.8803	0.0115482	0.000380247	11.8813	0.0144031	0.000531471	11.8808	0.0164232	0.000846468	11.8812	0.0181449	0.00230007
12.0387	0.00307569	0.000200968	12.0384	0.00599538	0.000612288	12.0386	0.00891666	0.000418533	12.0376	0.01157	0.000395624	12.0387	0.014474	0.000538842	12.0382	0.0165326	0.000560113	12.0386	0.0181746	0.00254291
12.1961	0.00308289	0.00025864	12.1958	0.00600249	0.000719484	12.196	0.00893672	0.000414114	12.195	0.0115312	0.000415725	12.1961	0.0144834	0.0007086	12.1956	0.0164527	0.000360467	12.196	0.0181617	0.00257328
12.3535	0.00307961	0.00029837	12.3531	0.00605767	0.00061673	12.3533	0.00892244	0.000424828	12.3523	0.0115253	0.000468396	12.3534	0.014454	0.000427215	12.3529	0.016459	0.000432291	12.3533	0.0182393	0.0022529
12.5108	0.00306991	0.000299673	12.5105	0.00605208	0.0007015	12.5107	0.00899359	0.000492335	12.5097	0.011634	0.000491002	12.5108	0.0145097	0.000530677	12.5103	0.0163967	0.000179095	12.5107	0.0183	0.0023465
12.6682	0.00307734	0.000274779	12.6679	0.006056	0.000732001	12.6681	0.00892965	0.000419639	12.667	0.0116231	0.000521473	12.6682	0.0145879	0.000642981	12.6676	0.0164891	0.00034957	12.6681	0.0184328	0.00237732
12.8256	0.00309357	0.000324385	12.8252	0.00603545	0.000680973	12.8254	0.00892615	0.000396841	12.8244	0.0116873	0.000590446	12.8256	0.0145178	0.000594996	12.825	0.0165055	0.000560912	12.8254	0.0184483	0.00226454
12.9829	0.00309184	0.00033384	12.9826	0.00598741	0.000717279	12.9828	0.00891193	0.000298682	12.9817	0.0116804	0.000728643	12.9829	0.0144862	0.000742412	12.9824	0.0165066	0.000428522	12.9828	0.0183514	0.00197399
13.1403	0.0030817	0.00031604	13.14	0.00602101	0.000821448	13.1402	0.00891202	0.000308039	13.1391	0.0115919	0.000820178	13.1403	0.0144638	0.000931299	13.1397	0.0164752	0.0005444	13.1402	0.0183542	0.00192099
13.2977	0.00306631	0.000292899	13.2973	0.00604988	0.000898224	13.2975	0.00893269	0.000161642	13.2965	0.0116877	0.000746819	13.2977	0.0144046	0.000685888	13.2971	0.0164886	0.00046944	13.2975	0.0183244	0.00166893
13.455	0.00307544	0.000309048	13.4547	0.0060279	0.000738279	13.4549	0.00887117	0.000147177	13.4538	0.011778	0.00076229	13.455	0.0144643	0.000889762	13.4545	0.0165569	0.000331085	13.4549	0.0184751	0.00153185
13.6124	0.00306991	0.00030991	13.6121	0.00600814	0.000713716	13.6123	0.00896006	0.000185176	13.6112	0.0117308	0.000631468	13.6124	0.0144438	0.00072022	13.6118	0.0164327	0.000540395	13.6123	0.0183981	0.0015076
13.7698	0.00308573	0.000339918	13.7694	0.00601085	0.000699744	13.7696	0.00894736	0.00018963	13.7685	0.0116879	0.000423811	13.7698	0.0144741	0.000661473	13.7692	0.0164896	0.000506723	13.7696	0.0184787	0.00138267
13.9272	0.00306991	0.000244024	13.9268	0.00603538	0.000785793	13.927	0.00892674	0.00014515	13.9259	0.0115997	0.000424033	13.9271	0.0144249	0.000717278	13.9265	0.0165824	0.000651794	13.927	0.0184501	0.00168328
14.0845	0.00306508	0.000252314	14.0841	0.00603081	0.000782102	14.0844	0.00891984	8.9223e-05	14.0832	0.0116324	0.000417092	14.0845	0.014467	0.000775838	14.0839	0.0165211	0.000342882	14.0844	0.0183776	0.0017963
14.2419	0.00309267	0.00024877	14.2415	0.00603429	0.000753342	14.2417	0.00894988	0.000185037	14.2406	0.011796	0.000425137	14.2419	0.0144429	0.000585936	14.2413	0.0165116	0.000413744	14.2417	0.0183781	0.00201801
14.3993	0.00309823	0.000291366	14.3989	0.00602682	0.000847972	14.3991	0.00888348	0.000219335	14.3979	0.0117495	0.000397213	14.3992	0.0143966	0.000640528	14.3986	0.0165204	0.00067483	14.3991	0.0184424	0.00189843
14.5566	0.00308102	0.000344547	14.5562	0.00606853	0.00086479	14.5565	0.00889065	0.000353439	14.5553	0.0117399	0.000373733	14.5566	0.0143785	0.000519558	14.556	0.0165681	0.000494393	14.5565	0.0183232	0.00193074
14.714	0.00308262	0.000359995	14.7136	0.00606444	0.000811992	14.7138	0.00893795	0.000468359	14.7126	0.0116184	0.000449343	14.714	0.0144119	0.000738119	14.7133	0.0165661	0.000521265	14.7138	0.0185937	0.00178897
14.8714	0.00306664	0.000351584	14.871	0.00608685	0.000901833	14.8712	0.00893524	0.000382418	14.87	0.0116594	0.000543866	14.8713	0.0143798	0.000609012	14.8707	0.0166243	0.000908076	14.8712	0.0185727	0.00174365
15.0287	0.00306366	0.000310327	15.0283	0.00603917	0.000742026	15.0286	0.00889054	0.000449912	15.0274	0.0117008	0.000623552	15.0287	0.0142599	0.000673577	15.0281	0.0166047	0.000798044	15.0286	0.0186219	0.00167611
15.1861	0.00306942	0.000350915	15.1857	0.00604993	0.000701027	15.1859	0.00888951	0.00035954	15.1847	0.0117152	0.000617061	15.1861	0.0142239	0.000313045	15.1854	0.0166724	0.000757761	15.1859	0.0185733	0.00197744
15.3435	0.00307349	0.000303064	15.3431	0.00603483	0.000887115	15.3433	0.00887596	0.000454846	15.3421	0.0118388	0.0003039	15.3435	0.014319	0.000622575	15.3428	0.0166024	0.00085993	15.3433	0.0186002	0.0018826
15.5008	0.00306004	0.000224307	15.5004	0.00600279	0.000800838	15.5007	0.00883354	0.000466846	15.4994	0.0117323	0.000300533	15.5008	0.0143329	0.000413046	15.5002	0.0165934	0.000716146	15.5007	0.018627	0.00166566
15.6582	0.00306963	0.000294768	15.6578	0.00600061	0.000813964	15.658	0.00886363	0.000505013	15.6568	0.011669	0.000342031	15.6582	0.0143088	0.000582192	15.6575	0.0166478	0.000639257	15.658	0.018776	0.00150692
15.8156	0.00308551	0.000282545	15.8152	0.00596379	0.000777941	15.8154	0.00892313	0.000435643	15.8141	0.0116804	0.000363012	15.8156	0.0143342	0.000475799	15.8149	0.0166439	0.000595086	15.8154	0.0186186	0.001808
15.973	0.00307768	0.000297639	15.9725	0.00599631	0.00066962	15.9728	0.0089515	0.000468444	15.9715	0.0116693	0.000404417	15.9729	0.0143285	0.000526522	15.9722	0.0166236	0.000552608	15.9728	0.018517	0.00199766
16.1303	0.00309549	0.000267151	16.1299	0.00600315	0.000690719	16.1301	0.00901878	0.000530243	16.1288	0.011705	0.000303274	16.1303	0.0143408	0.000760657	16.1296	0.0166776	0.000796929	16.1301	0.018524	0.00187184
16.2877	0.00309654	0.00030159	16.2873	0.00601883	0.000622317	16.2875	0.00900245	0.000589139	16.2862	0.0117166	0.000307914	16.2877	0.0143995	0.000663019	16.287	0.016687	0.000853428	16.2875	0.0185115	0.00180383
16.4451	0.00308594	0.00032769	16.4446	0.00600038	0.000579288	16.4449	0.00897333	0.00072205	16.4435	0.0116228	0.000351092	16.445	0.0143561	0.000620025	16.4443	0.0167176	0.000804471	16.4449	0.0185777	0.00169351
16.6024	0.00308493	0.000312906	16.602	0.00600124	0.000583349	16.6022	0.00897526	0.000692518	16.6009	0.0117128	0.000448479	16.6024	0.014455	0.000202964	16.6017	0.0167494	0.000733828	16.6022	0.0186203	0.00170207
16.7598	0.00306564	0.000295018	16.7593	0.00596793	0.000541928	16.7596	0.00900576	0.000589235	16.7583	0.0116616	0.000542821	16.7598	0.0143959	0.00031574	16.7591	0.0166411	0.00110189	16.7596	0.0184307	0.00172313
16.9172	0.00306903	0.000254288	16.9167	0.0059402	0.000518329	16.917	0.00898325	0.000703122	16.9156	0.0116147	0.000460717	16.9171	0.0143053	9.60839e-05	16.9164	0.016619	0.00103243	16.917	0.0185214	0.00183838
17.0745	0.0030773	0.000313002	17.0741	0.0059664	0.000458714	17.0743	0.00898208	0.000511545	17.073	0.0116229	0.000176403	17.0745	0.0144283	0.000149483	17.0738	0.0166547	0.000946199	17.0743	0.018435	0.00168742
17.2319	0.0030798	0.000247205	17.2314	0.0060013	0.000368238	17.2317	0.00892804	0.000520314	17.2303	0.0116591	0.000518316	17.2319	0.014396	0.000281204	17.2311	0.0166961	0.000841424	17.2317	0.0183959	0.00148741
17.3893	0.00305977	0.000249828	17.3888	0.00601609	0.000437318	17.3891	0.0089107	0.000492724	17.3877	0.0117275	0.00043805	17.3892	0.0143466	0.000456737	17.3885	0.0166291	0.000879939	17.3891	0.018296	0.00105158
17.5466	0.00306622	0.000242852	17.5462	0.0059899	0.000282434	17.5464	0.0088901	0.000544935	17.545	0.0116984	0.000496723	17.5466	0.0144539	0.000364213	17.5459	0.0164865	0.000738881	17.5464	0.0182969	0.00126686
17.704	0.00307343	0.000293827	17.7035	0.00599547	0.000340126	17.7038	0.00893661	0.000581408	17.7024	0.0116156	0.000532737	17.704	0.0145275	0.000364908	17.7032	0.0165234	0.000712521	17.7038	0.0182946	0.00165586
17.8614	0.0030774	0.000268265	17.8609	0.00602187	0.000381903	17.8612	0.00886932	0.000497141	17.8597	0.011592	0.000610602	17.8614	0.0144232	0.000511971	17.8606	0.0166231	0.000605014	17.8612	0.0182502	0.00196355
18.0188	0.00306123	0.000260505	18.0183	0.00595528	0.000382364	18.0186	0.0088321	0.000420169	18.0171	0.0116863	0.000583744	18.0187	0.0143915	0.000165889	18.0179	0.0166246	0.000910376	18.0186	0.0183653	0.00207969
18.1761	0.00306506	0.000264862	18.1756	0.00592442	0.000296729	18.1759	0.00888535	0.000495618	18.1744	0.0116612	0.000484381	18.1761	0.0143421	0.000261839	18.1753	0.0167102	0.000909351	18.1759	0.0183426	0.00173489
18.3335	0.00308797	0.000283858	18.333	0.0059174	0.000330865	18.3333	0.00893486	0.000380482	18.3318	0.011639	0.000365331	18.3335	0.0143934	0.000145324	18.3327	0.0166977	0.000887797	18.3333	0.0182203	0.00135642
18.4909	0.00310472	0.000294126	18.4904	0.00589539	0.00034761	18.4907	0.00893967	0.00041227	18.4892	0.0116512	0.000372411	18.4908	0.0143403	0.000170634	18.49	0.0168115	0.00104694	18.4907	0.0182563	0.00137273
18.6482	0.00310247	0.000232353	18.6477	0.00593318	0.000321358	18.648	0.00897089	0.00031235	18.6465	0.0116456	0.000622734	18.6482	0.0144249	0.00040264	18.6474	0.016794	0.00114672	18.648	0.0181185	0.0014248
18.8056	0.00308901	0.000194297	18.8051	0.00593773	0.000285308	18.8054	0.00898505	0.000344059	18.8039	0.0116648	0.000540164	18.8056	0.0143818	0.00020926	18.8048	0.0166826	0.00119672	18.8054	0.0182132	0.00129427
18.963	0.00307543	0.000231223	18.9625	0.00590795	0.000211936	18.9628	0.00892465	0.000429975	18.9612	0.011674	0.000513689	18.9629	0.0142951	0.000128993	18.9621	0.0166879	0.00109093	18.9628	0.018195	0.00139352
19.1203	0.00306525	0.000232423	19.1198	0.00591762	0.000216094	19.1201	0.0089249	0.00023944	19.1186	0.0117273	0.000369551	19.1203	0.0142464	0.000507324	19.1195	0.016672	0.00106587	19.1201	0.018214	0.00124896
19.2777	0.00308865	0.00020912	19.2772	0.00593636	0.000231897	19.2775	0.00890695	0.000225485	19.2759	0.0117186	0.00051019	19.2777	0.0142379	0.000425503	19.2768	0.0167095	0.000892073	19.2775	0.0182295	0.00134332
19.4351	0.00308485	0.00021437	19.4345	0.00594316	0.000291315	19.4349	0.00890247	0.000182113	19.4333	0.0115733	0.000483937	19.435	0.0142931	0.000395548	19.4342	0.0165924	0.000926711	19.4349	0.018384	0.00164462
19.5924	0.00307206	0.000171831	19.5919	0.00595234	0.000256448	19.5922	0.00888392	0.000173876	19.5906	0.0116003	0.000345632	19.5924	0.0141748	0.000468562	19.5916	0.0166448	0.000880429	19.5922	0.0183003	0.00119156
19.7498	0.00308055	0.0001522	19.7493	0.00595729	0.000369861	19.7496	0.0089023	0.000348915	19.748	0.0115904	0.000293414	19.7498	0.0141334	0.000442075	19.7489	0.0165593	0.000646764	19.7496	0.0182082	0.00105148
19.9072	0.00306608	0.000173327	19.9066	0.00597565	0.000338471	19.907	0.0089614	0.0002749	19.9053	0.0116106	0.000313162	19.9071	0.0141542	0.000247621	19.9063	0.0165379	0.000744985	19.907	0.0183404	0.00127586

## Sheet: T=0.7Tc,W=2.31kTc
y-coordinate, averaged density profile ρf*(y), and uncertainty of the averaged density profile Δρf*(y) of the adsorption isotherm for:
T / Tc = 0.7,
ρs / σf-3 = 1.07, and
Ϛ = 0.75.
The averaged density profiles are indicated with the respective bulk fluid pressure pfb / esf-3.
pfb / esf-3 =	0.00211(7)		pfb / esf-3 =	0.00570(14)		pfb / esf-3 =	0.00820(29)		pfb / esf-3 =	0.00942(42)		pfb / esf-3 =	0.0094(8)
y / σf	ρf*(y) / σf-3	Δρf*(y) / σf-3	y / σf	ρf*(y) / σf-3	Δρf*(y) / σf-3	y / σf	ρf*(y) / σf-3	Δρf*(y) / σf-3	y / σf	ρf*(y) / σf-3	Δρf*(y) / σf-3	y / σf	ρf*(y) / σf-3	Δρf*(y) / σf-3
4.79975	4.91895e-05	6.69354e-05	4.7997	0.000171502	0.000248369	4.79975	0.000365312	0.000397103	4.7997	0.000882447	0.000179404	4.79968	0	0
4.95712	2.94291e-05	4.03518e-05	4.95707	6.56775e-05	6.07464e-05	4.95712	0.000202058	0.000185806	4.95707	0.000400353	5.1826e-05	4.95704	0	0
5.11449	1.74906e-05	3.44237e-05	5.11444	3.1065e-05	3.25617e-05	5.11448	0.000119015	0.000120664	5.11444	0.000170878	4.37576e-05	5.11441	0	0
5.27186	1.23497e-05	1.2753e-05	5.2718	2.55272e-05	1.76309e-05	5.27185	8.85234e-05	6.37741e-05	5.2718	0.000112042	2.41735e-05	5.27178	2.45519e-05	3.40832e-06
5.42923	0.00420598	0.000151418	5.42917	0.0168666	0.000398713	5.42922	0.0398191	0.00334813	5.42917	0.0772991	0.00187269	5.42914	0.117805	0.0100836
5.5866	0.0465086	0.00108657	5.58654	0.179419	0.0047665	5.58659	0.398243	0.0283576	5.58654	0.715808	0.0133917	5.58651	1.01729	0.0827765
5.74397	0.0659565	0.00128288	5.7439	0.241954	0.00649086	5.74396	0.50005	0.0271431	5.7439	0.820889	0.0131608	5.74388	1.06975	0.0727638
5.90134	0.0307596	0.000669527	5.90127	0.110549	0.00502882	5.90133	0.222376	0.0103591	5.90127	0.352397	0.0104127	5.90124	0.441751	0.0254948
6.05871	0.0127773	0.000513614	6.05864	0.0465588	0.00298815	6.0587	0.0958075	0.00427372	6.05864	0.158115	0.00608554	6.05861	0.203081	0.0129235
6.21608	0.00713832	0.000365212	6.21601	0.026864	0.00216842	6.21607	0.0588812	0.00331475	6.21601	0.107508	0.00517197	6.21598	0.153804	0.0104016
6.37344	0.00509652	0.000273883	6.37337	0.0203004	0.00172195	6.37343	0.0507088	0.00411705	6.37337	0.11639	0.00936685	6.37334	0.215531	0.019718
6.53081	0.0042564	0.000217725	6.53074	0.0184085	0.00168679	6.5308	0.0552179	0.0062472	6.53074	0.16159	0.016731	6.53071	0.357053	0.0392701
6.68818	0.00378656	0.000159472	6.68811	0.0169862	0.00131795	6.68817	0.0527133	0.00636899	6.68811	0.15927	0.0180806	6.68808	0.353067	0.0378229
6.84555	0.00347425	0.000217942	6.84548	0.0144473	0.00117813	6.84554	0.0396166	0.00407877	6.84548	0.108682	0.0129533	6.84544	0.23098	0.0248177
7.00292	0.00323928	0.000221693	7.00284	0.0119552	0.00100701	7.00291	0.0283768	0.00264746	7.00284	0.0688417	0.00908722	7.00281	0.144537	0.015469
7.16029	0.00307648	0.000284483	7.16021	0.0104381	0.000916723	7.16028	0.0218425	0.00144873	7.16021	0.0493622	0.00631206	7.16018	0.108859	0.0110731
7.31766	0.00300711	0.000222908	7.31758	0.0096035	0.000823387	7.31765	0.0185218	0.00108754	7.31758	0.0409785	0.00587614	7.31754	0.103407	0.00987135
7.47503	0.00295946	0.000247118	7.47494	0.00904763	0.000888108	7.47502	0.0167218	0.00105692	7.47494	0.037094	0.00591774	7.47491	0.107342	0.00981975
7.6324	0.00293873	0.000241455	7.63231	0.00877564	0.000890684	7.63238	0.0154388	0.000724289	7.63231	0.0325506	0.00574404	7.63228	0.0955098	0.00936543
7.78977	0.00293388	0.000196594	7.78968	0.00852373	0.000751087	7.78975	0.0145497	0.000750059	7.78968	0.0273718	0.00404205	7.78964	0.0727695	0.00628859
7.94713	0.00290165	0.000158557	7.94705	0.00840768	0.000916445	7.94712	0.0137158	0.000481468	7.94705	0.0228769	0.00282418	7.94701	0.0534826	0.00452101
8.1045	0.0028777	0.000159432	8.10441	0.00831392	0.000879278	8.10449	0.0131646	0.000392084	8.10441	0.0199317	0.00205721	8.10437	0.0418665	0.00260758
8.26187	0.00286728	0.000145248	8.26178	0.00826405	0.000877813	8.26186	0.0128267	0.000522044	8.26178	0.0180199	0.001744	8.26174	0.0353832	0.00238233
8.41924	0.00286739	0.000194579	8.41915	0.00826427	0.00104771	8.41923	0.0125183	0.000461059	8.41915	0.016824	0.00130065	8.41911	0.0312909	0.00155644
8.57661	0.00286793	0.000148893	8.57652	0.00817747	0.000792984	8.5766	0.0124202	0.000992983	8.57652	0.0160391	0.00128407	8.57647	0.0274423	0.0017053
8.73398	0.00287513	0.000170826	8.73388	0.00816409	0.000820032	8.73397	0.012308	0.000685599	8.73388	0.0153468	0.00127867	8.73384	0.023588	0.00108734
8.89135	0.00286565	0.00019484	8.89125	0.00818039	0.000815123	8.89133	0.0123433	0.000923117	8.89125	0.0148456	0.00109385	8.89121	0.0205509	0.00104806
9.04872	0.00289229	0.000216888	9.04862	0.00813012	0.000723442	9.0487	0.0123827	0.000883985	9.04862	0.014545	0.00111323	9.04857	0.0185633	0.000563992
9.20609	0.00289396	0.000286236	9.20598	0.00811696	0.000674903	9.20607	0.0123088	0.000593203	9.20598	0.0143595	0.00118718	9.20594	0.0173824	0.000222219
9.36346	0.00286574	0.000244937	9.36335	0.00817809	0.000830739	9.36344	0.0122339	0.000898221	9.36335	0.0141822	0.00103569	9.36331	0.0163385	0.00024343
9.52082	0.00286507	0.000241146	9.52072	0.00817078	0.000916122	9.52081	0.0121698	0.00103607	9.52072	0.0141236	0.000930485	9.52067	0.0158187	0.00034412
9.67819	0.00288339	0.000221102	9.67809	0.00817995	0.00107094	9.67818	0.0122417	0.00117653	9.67809	0.014132	0.000891628	9.67804	0.0154535	0.000603909
9.83556	0.00289239	0.000190136	9.83545	0.0081813	0.00110062	9.83555	0.0121533	0.00098629	9.83545	0.0141754	0.0011306	9.83541	0.0150586	0.000828955
9.99293	0.00290198	0.000236388	9.99282	0.00814428	0.000841552	9.99292	0.0121641	0.00089107	9.99282	0.0141401	0.00122815	9.99277	0.0147088	0.000727865
10.1503	0.00290564	0.000213275	10.1502	0.00808063	0.000872448	10.1503	0.0121097	0.00078609	10.1502	0.0141976	0.00115929	10.1501	0.0145833	0.00053361
10.3077	0.00290666	0.000247867	10.3076	0.00811563	0.000732982	10.3077	0.0120918	0.000882059	10.3076	0.0140527	0.000888064	10.3075	0.0144612	0.000554729
10.465	0.00291078	0.000284119	10.4649	0.00818593	0.000714594	10.465	0.0121524	0.00081758	10.4649	0.013947	0.000905464	10.4649	0.0144255	0.00103919
10.6224	0.0029007	0.000291504	10.6223	0.00814617	0.000602032	10.6224	0.0122675	0.000829326	10.6223	0.0140243	0.00113077	10.6222	0.0143876	0.000957986
10.7798	0.00291021	0.00027639	10.7797	0.00810232	0.00032674	10.7798	0.012286	0.000722414	10.7797	0.0141123	0.00115054	10.7796	0.0143618	0.000617145
10.9371	0.00291052	0.000281478	10.937	0.00812482	0.000476345	10.9371	0.0122297	0.000856641	10.937	0.0141976	0.00117997	10.937	0.0142668	0.00057499
11.0945	0.00290129	0.000287097	11.0944	0.00816866	0.000735413	11.0945	0.0122008	0.00101837	11.0944	0.0142314	0.0011274	11.0943	0.0142262	0.00072536
11.2519	0.00289137	0.000230114	11.2518	0.0081335	0.000686251	11.2519	0.0121965	0.000944264	11.2518	0.0142161	0.00117737	11.2517	0.0141909	0.000620388
11.4093	0.00288698	0.000151317	11.4091	0.00807456	0.00068398	11.4092	0.0122504	0.000830776	11.4091	0.0141294	0.0012301	11.4091	0.0142648	0.000887614
11.5666	0.00289604	0.00020106	11.5665	0.00805652	0.000524741	11.5666	0.012183	0.000993788	11.5665	0.0140618	0.00135364	11.5664	0.0141901	0.00106462
11.724	0.00289247	0.000255183	11.7239	0.00803967	0.000327285	11.724	0.012212	0.00119215	11.7239	0.0141424	0.00163716	11.7238	0.0141792	0.00114538
11.8814	0.00289329	0.000234358	11.8812	0.00810638	0.000455043	11.8813	0.0122206	0.000979837	11.8812	0.0141146	0.0016222	11.8812	0.0141071	0.00104008
12.0387	0.00290589	0.000202387	12.0386	0.00815701	0.000369379	12.0387	0.0121329	0.00103305	12.0386	0.0141858	0.00170363	12.0385	0.0139563	0.00123787
12.1961	0.00291071	0.000137953	12.196	0.00811992	0.000506324	12.1961	0.0121477	0.00129719	12.196	0.0139762	0.00161026	12.1959	0.0141221	0.000867289
12.3535	0.00291724	0.000188485	12.3533	0.00812546	0.000426731	12.3534	0.0122912	0.00149145	12.3533	0.0139759	0.00159847	12.3533	0.0140702	0.00131019
12.5108	0.00289824	0.000171119	12.5107	0.00809078	0.000366789	12.5108	0.0122278	0.00140733	12.5107	0.0139428	0.00156097	12.5106	0.0140631	0.000943108
12.6682	0.00292103	0.000253616	12.6681	0.00805293	0.000298411	12.6682	0.0120413	0.00126856	12.6681	0.0139962	0.0014953	12.668	0.0140452	0.000823872
12.8256	0.00290261	0.000162448	12.8254	0.00808848	0.000388468	12.8256	0.0121912	0.00143814	12.8254	0.0141014	0.0013028	12.8254	0.0141845	0.000937172
12.9829	0.00289906	0.000224985	12.9828	0.00805895	0.000435932	12.9829	0.0122362	0.00150871	12.9828	0.0140374	0.00140744	12.9827	0.0142518	0.000700136
13.1403	0.00290184	0.000242525	13.1402	0.0080589	0.00056758	13.1403	0.0122296	0.00122651	13.1402	0.0139654	0.0014477	13.1401	0.0141561	0.000726546
13.2977	0.0029118	0.000228009	13.2975	0.0081155	0.000729187	13.2977	0.0122469	0.00130202	13.2975	0.0139612	0.00128001	13.2975	0.0141562	0.000807859
13.455	0.00288501	0.00018584	13.4549	0.00810286	0.000678902	13.455	0.0122861	0.00133675	13.4549	0.0139714	0.0015186	13.4548	0.0141786	0.000972424
13.6124	0.00290517	0.000204878	13.6123	0.0081345	0.000683184	13.6124	0.0121953	0.0011676	13.6123	0.014132	0.00153029	13.6122	0.0142592	0.000959039
13.7698	0.00289199	0.000229838	13.7696	0.00816839	0.00069058	13.7698	0.0122299	0.00110868	13.7696	0.0141342	0.00138361	13.7696	0.0142647	0.000386407
13.9272	0.00289217	0.00016553	13.927	0.00811651	0.000658065	13.9271	0.0122071	0.00107464	13.927	0.0140655	0.00132657	13.9269	0.0142274	0.000345087
14.0845	0.00289477	0.000170446	14.0844	0.0081076	0.000749392	14.0845	0.0121961	0.000978586	14.0844	0.0140186	0.00127705	14.0843	0.0142307	0.000177968
14.2419	0.00290432	0.000187889	14.2417	0.00808306	0.000567212	14.2419	0.012118	0.000788374	14.2417	0.013846	0.00124955	14.2417	0.0142575	0.000317439
14.3993	0.00292743	0.00027345	14.3991	0.0081225	0.000739991	14.3992	0.0121606	0.00104744	14.3991	0.0139135	0.00128572	14.399	0.0141686	0.000740764
14.5566	0.00293783	0.000307069	14.5565	0.00808102	0.000597033	14.5566	0.0121939	0.00115715	14.5565	0.0138744	0.000888142	14.5564	0.0141278	0.00086076
14.714	0.00291374	0.000238061	14.7138	0.00805707	0.000444373	14.714	0.0121434	0.00122466	14.7138	0.0137733	0.000893546	14.7138	0.014137	0.000830492
14.8714	0.00290514	0.000285319	14.8712	0.00809346	0.00049246	14.8713	0.012107	0.00104211	14.8712	0.0138949	0.00105323	14.8711	0.0140282	0.00136411
15.0287	0.00289325	0.000310014	15.0286	0.00807576	0.000356494	15.0287	0.0120726	0.000849471	15.0286	0.0139506	0.000859014	15.0285	0.0141441	0.000859909
15.1861	0.0029003	0.000333798	15.1859	0.00801662	0.000428832	15.1861	0.0120721	0.000910263	15.1859	0.0139533	0.000843841	15.1859	0.0143214	0.000978913
15.3435	0.00288663	0.000266886	15.3433	0.00807118	0.000526105	15.3435	0.0121131	0.000673457	15.3433	0.0140728	0.00106832	15.3432	0.014238	0.000524895
15.5008	0.00290133	0.000268834	15.5007	0.00803946	0.000415557	15.5008	0.0121715	0.000863141	15.5007	0.0139645	0.000680362	15.5006	0.0143762	0.000758139
15.6582	0.00290683	0.000252303	15.658	0.00813001	0.000509848	15.6582	0.0122787	0.000966376	15.658	0.0138984	0.000495934	15.658	0.014348	0.000859669
15.8156	0.00290427	0.000217794	15.8154	0.00811567	0.000467191	15.8156	0.0122439	0.000892412	15.8154	0.0139892	0.000460481	15.8153	0.0142662	0.000684747
15.973	0.00290157	0.000177537	15.9728	0.00813385	0.000669539	15.9729	0.0121911	0.000691179	15.9728	0.0139844	0.000504579	15.9727	0.0143068	0.000859856
16.1303	0.00288376	0.000179112	16.1301	0.00817398	0.000592712	16.1303	0.0121856	0.000631213	16.1301	0.0140447	0.000436541	16.1301	0.0143299	0.000530319
16.2877	0.00288618	0.000193742	16.2875	0.00812534	0.000617485	16.2877	0.0122062	0.000689605	16.2875	0.0140188	0.000471683	16.2874	0.0143354	0.000300976
16.4451	0.00287663	0.000160674	16.4449	0.00811889	0.000638315	16.445	0.0121408	0.000634701	16.4449	0.0141324	0.0007222	16.4448	0.0142788	0.000419098
16.6024	0.00287182	0.000126942	16.6022	0.00812124	0.000549106	16.6024	0.0121631	0.000626631	16.6022	0.0141074	0.000557945	16.6022	0.0143289	0.000474737
16.7598	0.00287205	0.000128541	16.7596	0.0081458	0.000588334	16.7598	0.012204	0.000696908	16.7596	0.0140452	0.000805665	16.7595	0.0141949	0.000537203
16.9172	0.00289276	0.000133079	16.917	0.0081758	0.000608649	16.9171	0.0122596	0.000811515	16.917	0.014013	0.000693622	16.9169	0.014389	0.000687753
17.0745	0.00289473	0.000117858	17.0743	0.00815918	0.000548161	17.0745	0.0122259	0.000928029	17.0743	0.0140294	0.000321955	17.0743	0.0144643	0.000801153
17.2319	0.00290347	0.000138653	17.2317	0.00818908	0.000600547	17.2319	0.0121686	0.000867191	17.2317	0.0141486	0.000835237	17.2316	0.0144766	0.000849553
17.3893	0.00288094	0.000174038	17.3891	0.00818706	0.000466511	17.3892	0.0120925	0.000802017	17.3891	0.0140182	0.000486263	17.389	0.014388	0.000933537
17.5466	0.00286988	0.000127362	17.5464	0.00818268	0.000465613	17.5466	0.0121202	0.00101188	17.5464	0.0139122	0.000444754	17.5464	0.0143878	0.00109026
17.704	0.00286534	0.000169804	17.7038	0.0081958	0.000672648	17.704	0.0121285	0.000840594	17.7038	0.0138722	0.00051188	17.7037	0.0143473	0.000520721
17.8614	0.00287579	0.000245763	17.8612	0.00808412	0.000624852	17.8614	0.0121662	0.000884668	17.8612	0.0138532	0.000578723	17.8611	0.0143753	0.000848164
18.0188	0.00288714	0.000225255	18.0186	0.0081226	0.000652464	18.0187	0.012116	0.000889276	18.0186	0.0139011	0.00039572	18.0185	0.0145586	0.000487012
18.1761	0.0029052	0.000204894	18.1759	0.00813502	0.00070773	18.1761	0.0120591	0.00101824	18.1759	0.0139076	0.000502122	18.1758	0.0144832	0.000336389
18.3335	0.00288445	0.000201593	18.3333	0.00807926	0.000604224	18.3335	0.0120701	0.000992532	18.3333	0.0137941	0.000372626	18.3332	0.0144863	0.000244246
18.4909	0.00288007	0.000183042	18.4907	0.00811434	0.000697324	18.4908	0.0121834	0.000995212	18.4907	0.0137904	0.000557377	18.4906	0.0145409	0.000457409
18.6482	0.00288649	0.000141833	18.648	0.00813607	0.000639999	18.6482	0.0122019	0.000806683	18.648	0.0138034	0.000251392	18.6479	0.0146403	0.000885227
18.8056	0.00290542	0.000190244	18.8054	0.00810422	0.000633448	18.8056	0.0122141	0.00103348	18.8054	0.0139831	0.000334474	18.8053	0.0145478	0.000981435
18.963	0.00290763	0.000249206	18.9628	0.0080385	0.00055892	18.9629	0.0122547	0.000882733	18.9628	0.013916	0.000544162	18.9627	0.0145055	0.000555832
19.1203	0.0029108	0.000176117	19.1201	0.00804452	0.000578635	19.1203	0.0122836	0.000490874	19.1201	0.0138436	0.000515689	19.12	0.014463	0.000790591
19.2777	0.00291837	0.00018596	19.2775	0.00810037	0.000447602	19.2777	0.0122154	0.00056829	19.2775	0.0139568	0.000654953	19.2774	0.0145254	0.00117269
19.4351	0.00292402	0.000207504	19.4349	0.00808755	0.00054624	19.435	0.0122198	0.000692425	19.4349	0.0138836	0.000709991	19.4348	0.0145	0.0012572
19.5924	0.00292143	0.000145447	19.5922	0.00807795	0.000439307	19.5924	0.0122001	0.000885694	19.5922	0.0139513	0.000618434	19.5921	0.0144785	0.0010256
19.7498	0.0029141	0.00015028	19.7496	0.00808116	0.000415208	19.7498	0.0121164	0.000811566	19.7496	0.0140735	0.000741221	19.7495	0.0146394	0.00119626
19.9072	0.0028908	8.66224e-05	19.907	0.0080851	0.000428981	19.9071	0.0121928	0.000907183	19.907	0.014168	0.00108689	19.9069	0.014558	0.00097939

## Sheet: T=0.77Tc,W=2.31kTc
y-coordinate, averaged density profile ρf*(y), and uncertainty of the averaged density profile Δρf*(y) of the adsorption isotherm for:
T / Tc = 0.77,
ρs / σf-3 = 1.07, and
Ϛ = 0.75.
The averaged density profiles are indicated with the respective bulk fluid pressure pfb / esf-3.
pfb / esf-3 =	0.002424(45)		pfb / esf-3 =	0.00680(12)		pfb / esf-3 =	0.01045(23)		pfb / esf-3 =	0.0136(6)		pfb / esf-3 =	0.0147(6)		pfb / esf-3 =	0.01568(14)		pfb / esf-3 =	0.01689(34)		pfb / esf-3 =	0.01691(37)		pfb / esf-3 =	0.01749(36)		pfb / esf-3 =	0.0180(10)		pfb / esf-3 =	0.0179(12)		pfb / esf-3 =	0.0185(14)		pfb / esf-3 =	0.0187(9)
y / σf	ρf*(y) / σf-3	Δρf*(y) / σf-3	y / σf	ρf*(y) / σf-3	Δρf*(y) / σf-3	y / σf	ρf*(y) / σf-3	Δρf*(y) / σf-3	y / σf	ρf*(y) / σf-3	Δρf*(y) / σf-3	y / σf	ρf*(y) / σf-3	Δρf*(y) / σf-3	y / σf	ρf*(y) / σf-3	Δρf*(y) / σf-3	y / σf	ρf*(y) / σf-3	Δρf*(y) / σf-3	y / σf	ρf*(y) / σf-3	Δρf*(y) / σf-3	y / σf	ρf*(y) / σf-3	Δρf*(y) / σf-3	y / σf	ρf*(y) / σf-3	Δρf*(y) / σf-3	y / σf	ρf*(y) / σf-3	Δρf*(y) / σf-3	y / σf	ρf*(y) / σf-3	Δρf*(y) / σf-3	y / σf	ρf*(y) / σf-3	Δρf*(y) / σf-3
4.79975	1.91864e-05	5.08314e-05	4.7997	1.50883e-05	8.36856e-05	4.79975	0.000256722	0.000257058	4.7997	0.000377363	0.000184791	4.79974	0	0	4.79968	0	0	4.79966	0.000375229	0.000133789	4.79942	0	0	4.79965	0	0	4.79974	0	0	4.79943	0	0	4.79951	0	0	4.79976	0	0
4.95712	6.33028e-06	2.05379e-05	4.95707	6.96474e-06	3.35045e-05	4.95712	0.000184137	0.000176402	4.95707	0.000260189	8.65203e-05	4.95711	0	0	4.95704	0	0	4.95703	0.000177088	6.92974e-05	4.95678	0	0	4.95701	0	0	4.95711	0	0	4.95678	0	0	4.95687	0	0	4.95713	0	0
5.11449	2.80486e-06	9.56758e-06	5.11444	4.09321e-06	1.25584e-05	5.11448	8.32982e-05	6.92689e-05	5.11444	0.000160613	5.58348e-05	5.11448	0	0	5.11441	0	0	5.1144	8.50183e-05	1.85446e-05	5.11414	0	0	5.11438	0	0	5.11448	0	0	5.11414	0	0	5.11423	0	0	5.1145	0	0
5.27186	2.69415e-06	5.37347e-06	5.2718	6.02039e-06	5.66833e-06	5.27185	5.80709e-05	4.72114e-05	5.2718	0.000124289	5.84917e-05	5.27184	1.30302e-05	3.61794e-06	5.27178	1.76418e-05	4.49937e-06	5.27176	7.86398e-05	2.67369e-05	5.27149	2.3458e-05	5.01216e-06	5.27174	3.2836e-05	4.94674e-06	5.27184	3.5185e-05	3.43129e-06	5.2715	4.35646e-05	8.82154e-06	5.27159	4.36672e-05	4.2443e-06	5.27187	4.71448e-05	1.57423e-05
5.42923	0.00300107	0.000182886	5.42917	0.0104169	0.000279146	5.42922	0.0214354	0.00129261	5.42917	0.0359664	0.00323227	5.42921	0.0436405	0.00396367	5.42914	0.0557215	0.0045477	5.42913	0.064248	0.00349565	5.42885	0.0762107	0.00236527	5.42911	0.0898684	0.00496562	5.42921	0.105368	0.00822465	5.42886	0.11957	0.00379599	5.42895	0.130631	0.0114655	5.42924	0.13727	0.00701759
5.5866	0.0326351	0.00197579	5.58654	0.111386	0.00250396	5.58659	0.221463	0.0145115	5.58654	0.358353	0.0305666	5.58658	0.426162	0.0333525	5.58651	0.530068	0.0429843	5.58649	0.601005	0.0326622	5.58621	0.70227	0.0223977	5.58648	0.805502	0.0402679	5.58658	0.918308	0.0619529	5.58622	1.0259	0.0275993	5.58632	1.1038	0.0866926	5.58661	1.14102	0.0466462
5.74397	0.0492278	0.00256308	5.7439	0.162971	0.00393188	5.74396	0.31198	0.018471	5.7439	0.48583	0.0325533	5.74395	0.566435	0.0335568	5.74388	0.685516	0.0408203	5.74386	0.765195	0.0286026	5.74357	0.870321	0.0250779	5.74384	0.970753	0.0352186	5.74395	1.06982	0.0474962	5.74358	1.17173	0.0130661	5.74368	1.23653	0.0635808	5.74398	1.26318	0.0294134
5.90134	0.0249243	0.00122066	5.90127	0.0816287	0.0036387	5.90133	0.153767	0.00807141	5.90127	0.236298	0.0143689	5.90132	0.274524	0.0144864	5.90124	0.328104	0.0148728	5.90122	0.36636	0.0080433	5.90092	0.409938	0.0129947	5.90121	0.452776	0.0108979	5.90132	0.49245	0.0122812	5.90093	0.533536	0.00845742	5.90104	0.557888	0.0158267	5.90135	0.569505	0.00731976
6.05871	0.0111878	0.000314963	6.05864	0.0370715	0.00217024	6.0587	0.0705365	0.00344839	6.05864	0.110021	0.00761769	6.05869	0.129337	0.00784778	6.05861	0.155612	0.00553149	6.05859	0.176296	0.0032788	6.05828	0.198063	0.00687278	6.05857	0.221299	0.00353112	6.05869	0.24348	0.00370719	6.05829	0.265228	0.0065702	6.0584	0.279582	0.00749772	6.05872	0.286079	0.00523981
6.21608	0.00655033	9.80693e-05	6.21601	0.0221735	0.00119599	6.21607	0.0433922	0.00251092	6.21601	0.0706865	0.00478985	6.21606	0.0844046	0.00498667	6.21598	0.104588	0.00472584	6.21596	0.121568	0.00396454	6.21564	0.139848	0.00525174	6.21594	0.162056	0.00243199	6.21606	0.182716	0.00468857	6.21565	0.205658	0.00705043	6.21576	0.222336	0.00696783	6.21609	0.231202	0.00586571
6.37344	0.0047965	9.4788e-05	6.37337	0.0167731	0.000980507	6.37343	0.034408	0.00183613	6.37337	0.0602387	0.00534102	6.37342	0.0749772	0.00526103	6.37334	0.0986791	0.00589848	6.37332	0.120808	0.00344743	6.373	0.14618	0.00460795	6.3733	0.182227	0.00546846	6.37342	0.221481	0.0107194	6.37301	0.265846	0.0109213	6.37312	0.301954	0.0228106	6.37345	0.322991	0.0178417
6.53081	0.00403903	0.000145043	6.53074	0.0146395	0.000910463	6.5308	0.0324254	0.00220092	6.53074	0.0628613	0.00674104	6.53079	0.0825183	0.00869514	6.53071	0.117004	0.0111742	6.53069	0.151606	0.0062196	6.53036	0.194003	0.00908591	6.53067	0.259064	0.0139943	6.53079	0.335368	0.0242388	6.53037	0.422991	0.0266557	6.53048	0.496422	0.0512548	6.53082	0.539927	0.0423164
6.68818	0.00366033	0.000102225	6.68811	0.0135267	0.000917446	6.68817	0.0308491	0.00276457	6.68811	0.0620884	0.00741269	6.68816	0.0828357	0.00944274	6.68808	0.119571	0.010463	6.68805	0.157296	0.00698421	6.68771	0.203064	0.0102828	6.68803	0.273759	0.0145978	6.68816	0.356849	0.0224948	6.68773	0.455039	0.0262428	6.68784	0.535251	0.0482723	6.68819	0.583278	0.0421085
6.84555	0.00338775	0.000167721	6.84548	0.012194	0.000938231	6.84554	0.0264811	0.00241989	6.84548	0.0507467	0.00579894	6.84553	0.0663387	0.00584915	6.84544	0.0930311	0.00693108	6.84542	0.121259	0.00471018	6.84507	0.153498	0.00747656	6.8454	0.205236	0.00690587	6.84553	0.262945	0.011982	6.84508	0.333777	0.0166033	6.8452	0.39278	0.0287803	6.84556	0.428895	0.0278389
7.00292	0.00319524	0.000220129	7.00284	0.0109025	0.000783369	7.00291	0.0219949	0.00158011	7.00284	0.0390043	0.00422499	7.0029	0.0496068	0.00359437	7.00281	0.0670599	0.00282162	7.00279	0.0862005	0.00341706	7.00243	0.105991	0.00545717	7.00276	0.140709	0.002752	7.0029	0.178865	0.00714788	7.00244	0.227481	0.0131854	7.00256	0.269408	0.0174422	7.00293	0.296606	0.0177637
7.16029	0.00307737	0.000192834	7.16021	0.0100215	0.000568347	7.16028	0.0189133	0.00113014	7.16021	0.0315301	0.00246375	7.16027	0.0395495	0.00269644	7.16018	0.0517242	0.00185068	7.16015	0.0656409	0.00277037	7.15979	0.0796993	0.00267234	7.16013	0.106711	0.00180278	7.16027	0.13692	0.00607046	7.1598	0.177286	0.0129692	7.15993	0.214066	0.0133637	7.1603	0.240212	0.0167454
7.31766	0.00302202	0.0001835	7.31758	0.00953709	0.000584889	7.31765	0.0172971	0.000678812	7.31758	0.0275942	0.00206318	7.31764	0.0341916	0.00326111	7.31754	0.0440297	0.00167967	7.31752	0.0557337	0.0030815	7.31715	0.067825	0.00322002	7.3175	0.0930979	0.00295708	7.31764	0.1227	0.00578301	7.31716	0.164644	0.0176482	7.31729	0.206861	0.0161907	7.31767	0.238271	0.0220827
7.47503	0.00299939	0.000146878	7.47494	0.00927567	0.000768463	7.47502	0.0163377	0.000732401	7.47494	0.0252311	0.00153002	7.475	0.0311493	0.00264285	7.47491	0.0395954	0.00183014	7.47488	0.0505461	0.00301936	7.4745	0.0618878	0.00258842	7.47486	0.0878529	0.00377514	7.475	0.119655	0.00763422	7.47452	0.167333	0.0234805	7.47465	0.218201	0.0194029	7.47504	0.258512	0.0307628
7.6324	0.00300532	0.000206927	7.63231	0.00909418	0.000734261	7.63238	0.015707	0.00119763	7.63231	0.0235402	0.00174986	7.63237	0.0287849	0.00200648	7.63228	0.036239	0.00211109	7.63225	0.0460664	0.0020482	7.63186	0.0560588	0.00310986	7.63223	0.080264	0.00447737	7.63237	0.110971	0.00615407	7.63188	0.157534	0.0255252	7.63201	0.209604	0.017863	7.63241	0.252442	0.0305034
7.78977	0.00301431	0.000174761	7.78968	0.00896317	0.000742775	7.78975	0.0151628	0.00137866	7.78968	0.0222394	0.00158278	7.78974	0.0266283	0.00224538	7.78964	0.0327697	0.0024027	7.78962	0.0412006	0.00257446	7.78922	0.0489968	0.00246831	7.78959	0.0683673	0.00378238	7.78974	0.0927114	0.00591729	7.78923	0.130306	0.020788	7.78937	0.174928	0.0147485	7.78978	0.211539	0.0247412
7.94713	0.00300211	0.000162894	7.94705	0.0088394	0.000572945	7.94712	0.0150116	0.00129398	7.94705	0.0211988	0.000963888	7.94711	0.0248723	0.00213025	7.94701	0.0296687	0.00259137	7.94698	0.0365722	0.00314879	7.94658	0.0422976	0.00156689	7.94696	0.0572528	0.0044371	7.94711	0.0739675	0.00501057	7.94659	0.102582	0.0184252	7.94673	0.137262	0.0127111	7.94715	0.167232	0.0203414
8.1045	0.00298153	0.000206468	8.10441	0.0087669	0.000517426	8.10449	0.0147859	0.00161335	8.10441	0.0205127	0.000730131	8.10448	0.0234864	0.00220491	8.10437	0.0274441	0.00226376	8.10435	0.0331516	0.0031165	8.10394	0.0373072	0.00218337	8.10432	0.0486514	0.00466263	8.10448	0.061033	0.00483499	8.10395	0.0836997	0.014699	8.10409	0.111206	0.0122657	8.10452	0.13782	0.0167156
8.26187	0.00298824	0.000185252	8.26178	0.00877572	0.000624479	8.26186	0.0145482	0.00106943	8.26178	0.0200225	0.00115831	8.26185	0.0226019	0.00228414	8.26174	0.0262169	0.00296767	8.26171	0.0306631	0.00228251	8.2613	0.0339133	0.00238792	8.26169	0.0429867	0.00453323	8.26185	0.0529588	0.00475199	8.26131	0.0720171	0.0135507	8.26145	0.0967721	0.0123629	8.26189	0.121677	0.0158695
8.41924	0.00297043	0.000169328	8.41915	0.0087713	0.000663505	8.41923	0.0144235	0.000875079	8.41915	0.0195653	0.00104489	8.41921	0.0220666	0.00220621	8.41911	0.025095	0.00271476	8.41908	0.0291482	0.00272546	8.41865	0.0316073	0.00214604	8.41905	0.039133	0.00337256	8.41921	0.0474146	0.00406842	8.41867	0.064281	0.0143686	8.41881	0.0872941	0.0117123	8.41925	0.111796	0.0135698
8.57661	0.00298392	0.000141215	8.57652	0.00874058	0.000668457	8.5766	0.014342	0.000857988	8.57652	0.0193137	0.00107026	8.57658	0.0217539	0.00198337	8.57647	0.0243238	0.00256701	8.57645	0.0280198	0.00283961	8.57601	0.0300551	0.00234757	8.57642	0.0360534	0.0035912	8.57658	0.043001	0.00455556	8.57602	0.0577314	0.0120534	8.57617	0.0778902	0.0124541	8.57662	0.100741	0.00921431
8.73398	0.00297849	0.00011552	8.73388	0.00869896	0.000688491	8.73397	0.0142679	0.000850168	8.73388	0.0191978	0.001186	8.73395	0.0213913	0.00199146	8.73384	0.0237641	0.0027098	8.73381	0.0272473	0.00315666	8.73337	0.0286753	0.00151633	8.73379	0.0336245	0.00406108	8.73395	0.0391429	0.00390597	8.73338	0.0504407	0.00968216	8.73354	0.0677936	0.0109001	8.73399	0.0867138	0.0100141
8.89135	0.00298494	0.000173635	8.89125	0.00868392	0.000720262	8.89133	0.0140319	0.000683549	8.89125	0.0189743	0.00102506	8.89132	0.0209346	0.00191381	8.89121	0.0232524	0.0026938	8.89118	0.0264697	0.00292404	8.89073	0.0275022	0.00138663	8.89115	0.0316	0.00336109	8.89132	0.0356529	0.00405808	8.89074	0.0445458	0.00784332	8.8909	0.0579749	0.00817543	8.89136	0.0740771	0.00693868
9.04872	0.00299832	0.000214456	9.04862	0.00869478	0.00051582	9.0487	0.0141107	0.000699283	9.04862	0.0189653	0.00126813	9.04869	0.0208147	0.00190455	9.04857	0.0230275	0.00284419	9.04854	0.0258939	0.00230001	9.04809	0.0266021	0.00184819	9.04852	0.0299714	0.00297415	9.04869	0.0327496	0.00382352	9.0481	0.0399893	0.00704082	9.04826	0.0504373	0.00797513	9.04873	0.0634307	0.00556941
9.20609	0.00298559	0.000205421	9.20598	0.00869367	0.000365703	9.20607	0.0141358	0.000851812	9.20598	0.0189935	0.00124324	9.20606	0.0206565	0.00201088	9.20594	0.0228017	0.00283817	9.20591	0.025535	0.00223906	9.20544	0.0260632	0.00231748	9.20588	0.0288379	0.00309507	9.20606	0.0307276	0.00346647	9.20546	0.0367396	0.00588727	9.20562	0.0450396	0.00698371	9.2061	0.0554918	0.00521593
9.36346	0.00298901	0.000205148	9.36335	0.00877419	0.000627525	9.36344	0.014135	0.00063263	9.36335	0.0189509	0.00113702	9.36343	0.0207235	0.00165161	9.36331	0.0228007	0.00264305	9.36328	0.0251675	0.00199555	9.3628	0.0255878	0.00209181	9.36325	0.027682	0.0028537	9.36343	0.0295259	0.00341718	9.36282	0.0343953	0.00471231	9.36298	0.0408533	0.0060504	9.36347	0.0497888	0.00370212
9.52082	0.00299909	0.000292702	9.52072	0.00872956	0.000548193	9.52081	0.0141093	0.000515557	9.52072	0.0187898	0.00112214	9.52079	0.0205568	0.00170954	9.52067	0.0225592	0.00273075	9.52064	0.0248811	0.00216067	9.52016	0.0254557	0.00207619	9.52061	0.0272697	0.00355442	9.52079	0.0285649	0.00310533	9.52017	0.03243	0.00354354	9.52034	0.0378795	0.00551681	9.52084	0.0453853	0.00280689
9.67819	0.00298151	0.000219318	9.67809	0.00874077	0.000622433	9.67818	0.0141289	0.000684072	9.67809	0.0188303	0.000954415	9.67816	0.020597	0.00215066	9.67804	0.0224141	0.00238782	9.67801	0.0247155	0.00216484	9.67752	0.0253128	0.00202806	9.67798	0.0266171	0.00328491	9.67816	0.0276744	0.00230501	9.67753	0.0307799	0.0035509	9.6777	0.0352601	0.00535154	9.67821	0.0415997	0.00262316
9.83556	0.00299501	0.000255056	9.83545	0.00877797	0.000640646	9.83555	0.0141958	0.000696148	9.83545	0.0188421	0.000674108	9.83553	0.0204703	0.0021503	9.83541	0.0225121	0.0027194	9.83537	0.0245762	0.00216021	9.83488	0.0251121	0.00161439	9.83534	0.0263034	0.00324632	9.83553	0.0269934	0.00237895	9.83489	0.0295504	0.00303187	9.83506	0.0333174	0.00461423	9.83558	0.0381592	0.00273635
9.99293	0.00299465	0.000235739	9.99282	0.00879253	0.000864636	9.99292	0.0141495	0.000748867	9.99282	0.0188464	0.000867593	9.9929	0.0202991	0.0022145	9.99277	0.0225804	0.00287232	9.99274	0.0245821	0.00221981	9.99223	0.0250261	0.00202188	9.99271	0.0259807	0.00258143	9.9929	0.0266302	0.00227857	9.99225	0.0285111	0.00292892	9.99242	0.0317412	0.00449825	9.99295	0.0356498	0.00248271
10.1503	0.00298602	0.000204569	10.1502	0.00877562	0.000756309	10.1503	0.014211	0.000794469	10.1502	0.0188217	0.000574897	10.1503	0.0202389	0.00211491	10.1501	0.0224671	0.00286848	10.1501	0.0245633	0.00245038	10.1496	0.0249269	0.00226406	10.1501	0.0258153	0.00285855	10.1503	0.0262878	0.0024053	10.1496	0.0278852	0.00296325	10.1498	0.0300733	0.00347306	10.1503	0.0336944	0.00239541
10.3077	0.00300328	0.000184748	10.3076	0.00869146	0.000518654	10.3077	0.0141746	0.000573748	10.3076	0.0187505	0.000814083	10.3076	0.0203524	0.00229489	10.3075	0.022459	0.00265308	10.3075	0.0246101	0.00225377	10.3069	0.0248866	0.00228123	10.3074	0.0254582	0.00283314	10.3076	0.0262343	0.00261052	10.307	0.0274626	0.00316077	10.3071	0.0291145	0.0034032	10.3077	0.0318209	0.00250389
10.465	0.00301914	0.000104402	10.4649	0.00867788	0.000521679	10.465	0.0140272	0.000630101	10.4649	0.0188983	0.000921612	10.465	0.0202089	0.0020299	10.4649	0.0224528	0.00277111	10.4648	0.0244325	0.00190585	10.4643	0.0245921	0.00203371	10.4648	0.0254131	0.00208889	10.465	0.0258426	0.00186219	10.4643	0.0268027	0.00297709	10.4645	0.0283469	0.00323004	10.4651	0.0307544	0.00171124
10.6224	0.00302482	0.000121429	10.6223	0.00873114	0.000633356	10.6224	0.0140669	0.000769319	10.6223	0.0187494	0.00109429	10.6224	0.020399	0.00215607	10.6222	0.022477	0.00211216	10.6222	0.0245441	0.00232119	10.6217	0.024577	0.00238483	10.6222	0.0252897	0.00222603	10.6224	0.0257051	0.00235509	10.6217	0.0266291	0.00282497	10.6219	0.0280855	0.00336218	10.6224	0.0300823	0.00228351
10.7798	0.00301852	0.000160781	10.7797	0.00876504	0.000747458	10.7798	0.0142182	0.000763937	10.7797	0.018821	0.000884838	10.7797	0.0205876	0.0026172	10.7796	0.0224987	0.00225869	10.7796	0.0243383	0.00262829	10.779	0.0245068	0.00176912	10.7795	0.0254777	0.00269807	10.7797	0.0256278	0.00236712	10.779	0.0262996	0.00291323	10.7792	0.0276089	0.00335222	10.7798	0.0294468	0.00192443
10.9371	0.00302673	0.00015967	10.937	0.00874451	0.000736726	10.9371	0.014073	0.000550414	10.937	0.0187355	0.000951679	10.9371	0.0205798	0.00246196	10.937	0.0226932	0.00296045	10.9369	0.0243612	0.00252351	10.9364	0.02455	0.00180342	10.9369	0.0253852	0.00262838	10.9371	0.0255657	0.00175915	10.9364	0.0262232	0.00275009	10.9366	0.0274683	0.00368042	10.9372	0.0286874	0.00224652
11.0945	0.00304745	0.000156787	11.0944	0.00876339	0.000578178	11.0945	0.0141613	0.000619938	11.0944	0.0188188	0.00116971	11.0945	0.020519	0.00220464	11.0943	0.0226235	0.00283177	11.0943	0.0242735	0.00227893	11.0937	0.0244593	0.00153876	11.0943	0.0255247	0.00267443	11.0945	0.02557	0.00194332	11.0938	0.0260622	0.0031021	11.094	0.0272082	0.0032238	11.0945	0.028219	0.00218844
11.2519	0.00303175	0.00019839	11.2518	0.00877073	0.000542651	11.2519	0.0142127	0.000537793	11.2518	0.0187478	0.00119127	11.2518	0.0205521	0.00225045	11.2517	0.0225324	0.00308143	11.2517	0.0243247	0.00221149	11.2511	0.0244809	0.00193061	11.2516	0.0253499	0.00262107	11.2518	0.0254547	0.00132148	11.2511	0.0261928	0.00280728	11.2513	0.0271266	0.00284688	11.2519	0.0280172	0.00233207
11.4093	0.00301898	0.000143605	11.4091	0.00873111	0.00054982	11.4092	0.0142058	0.000753048	11.4091	0.018838	0.00133963	11.4092	0.0204372	0.0018144	11.4091	0.0223639	0.00257079	11.409	0.0243187	0.00212754	11.4085	0.0244748	0.00155191	11.409	0.0253445	0.00213018	11.4092	0.0253614	0.00146683	11.4085	0.02618	0.00278962	11.4087	0.0267861	0.00232717	11.4093	0.0278951	0.00245849
11.5666	0.00302912	0.000160618	11.5665	0.00868483	0.000709623	11.5666	0.0140825	0.000821542	11.5665	0.0187701	0.0010591	11.5666	0.0204419	0.00182463	11.5664	0.0224234	0.00240572	11.5664	0.0241408	0.00231194	11.5658	0.0245129	0.00167001	11.5664	0.0251937	0.00180564	11.5666	0.0253706	0.00154115	11.5658	0.0259399	0.00322961	11.566	0.0269551	0.00254403	11.5666	0.0278203	0.00232843
11.724	0.0030195	0.000119416	11.7239	0.00875315	0.000608601	11.724	0.0139895	0.000513609	11.7239	0.0187543	0.000876721	11.724	0.0203803	0.00190191	11.7238	0.022461	0.00257255	11.7238	0.0243129	0.00220664	11.7232	0.024422	0.00171276	11.7237	0.0250436	0.00137468	11.724	0.025584	0.00116754	11.7232	0.0259853	0.00295611	11.7234	0.0268599	0.00298783	11.724	0.0276848	0.00187283
11.8814	0.00301282	9.87555e-05	11.8812	0.0087467	0.000620325	11.8813	0.0140257	0.000718964	11.8812	0.0187599	0.00136065	11.8813	0.0203249	0.00192439	11.8812	0.0223094	0.00288995	11.8811	0.0244162	0.00229646	11.8805	0.0244566	0.00199826	11.8811	0.0250393	0.00148786	11.8813	0.0253952	0.00131715	11.8805	0.0260256	0.00337478	11.8808	0.0268804	0.00376464	11.8814	0.0275912	0.00229818
12.0387	0.00299776	0.000145024	12.0386	0.00871691	0.000719035	12.0387	0.0140587	0.00076528	12.0386	0.0188411	0.00166946	12.0387	0.0203107	0.00211525	12.0385	0.022517	0.00255309	12.0385	0.0243257	0.00203285	12.0379	0.0247736	0.00183424	12.0385	0.0252107	0.00157957	12.0387	0.025452	0.00137996	12.0379	0.0261506	0.00315298	12.0381	0.0268274	0.00317686	12.0387	0.0274002	0.0020716
12.1961	0.00299162	0.000157458	12.196	0.00872741	0.000764632	12.1961	0.0140906	0.000649844	12.196	0.0188907	0.00178011	12.1961	0.0203653	0.00234054	12.1959	0.0226089	0.00271857	12.1959	0.0241756	0.00188393	12.1952	0.0247159	0.00171376	12.1958	0.0253641	0.00203814	12.1961	0.0253345	0.00152988	12.1953	0.0261374	0.00255308	12.1955	0.0265124	0.00283214	12.1961	0.0274621	0.00257338
12.3535	0.00299897	0.000181847	12.3533	0.00871187	0.000645315	12.3534	0.0141354	0.000856085	12.3533	0.0187849	0.00170913	12.3534	0.0203292	0.00189908	12.3533	0.0225204	0.00238187	12.3532	0.0241524	0.00155556	12.3526	0.0247841	0.00189349	12.3532	0.0253514	0.00212996	12.3534	0.0252838	0.00118604	12.3526	0.026025	0.00216602	12.3528	0.026648	0.00287223	12.3535	0.0274812	0.00249804
12.5108	0.0030013	0.000197442	12.5107	0.00875627	0.000572441	12.5108	0.0141555	0.00073736	12.5107	0.0187856	0.00168569	12.5108	0.0202786	0.00190223	12.5106	0.0226668	0.0028352	12.5106	0.0243569	0.00148555	12.51	0.0247685	0.00194223	12.5106	0.0252274	0.00197518	12.5108	0.0253996	0.0011712	12.51	0.025881	0.00193317	12.5102	0.0265345	0.00316751	12.5109	0.0275205	0.00234548
12.6682	0.00299839	0.000212317	12.6681	0.00876484	0.000738862	12.6682	0.0142155	0.000881605	12.6681	0.0187656	0.0012331	12.6682	0.0203679	0.00169315	12.668	0.0227529	0.00239606	12.668	0.0242549	0.00202898	12.6673	0.0248386	0.00154679	12.6679	0.0253535	0.00234773	12.6682	0.0254116	0.00152661	12.6673	0.0259457	0.00270695	12.6676	0.0262903	0.00314088	12.6682	0.0274572	0.00214871
12.8256	0.00299984	0.000206091	12.8254	0.00877328	0.00082143	12.8256	0.0142243	0.00103856	12.8254	0.0187702	0.00148998	12.8255	0.0201975	0.00165088	12.8254	0.0226506	0.00244022	12.8253	0.0242914	0.00227783	12.8247	0.0246788	0.00167691	12.8253	0.0251536	0.00203944	12.8255	0.0255276	0.00168357	12.8247	0.0259337	0.00258525	12.8249	0.0262492	0.00266738	12.8256	0.0272794	0.00260045
12.9829	0.00299934	0.00018476	12.9828	0.00877767	0.000713176	12.9829	0.0141699	0.000930737	12.9828	0.0187664	0.00129218	12.9829	0.0203334	0.00167683	12.9827	0.0226632	0.002473	12.9827	0.024362	0.00200373	12.982	0.0246263	0.00155786	12.9827	0.0251449	0.0014563	12.9829	0.0254514	0.00171347	12.9821	0.0258947	0.00258825	12.9823	0.0264398	0.00269502	12.983	0.0273941	0.00290755
13.1403	0.00301748	0.000258076	13.1402	0.00880023	0.000656867	13.1403	0.0141484	0.00100403	13.1402	0.0187252	0.000910378	13.1403	0.0203475	0.00181525	13.1401	0.0225291	0.00148173	13.1401	0.0242989	0.00234122	13.1394	0.0246625	0.00161521	13.14	0.0253247	0.00202244	13.1403	0.0252503	0.00175877	13.1394	0.0258274	0.00381071	13.1396	0.0267238	0.00345484	13.1403	0.0273944	0.00305651
13.2977	0.00301111	0.000233482	13.2975	0.00880516	0.000657905	13.2977	0.0141502	0.000873657	13.2975	0.0187337	0.000649432	13.2976	0.0204721	0.00192967	13.2975	0.0225555	0.00199845	13.2974	0.0242377	0.00192269	13.2968	0.024767	0.00203241	13.2974	0.0255107	0.00221546	13.2976	0.0255441	0.00128418	13.2968	0.0259096	0.00308628	13.297	0.0266502	0.00349388	13.2977	0.0273628	0.00329965
13.455	0.00300251	0.000193997	13.4549	0.00876449	0.000719393	13.455	0.0142067	0.000563857	13.4549	0.0187272	0.00102268	13.455	0.0204911	0.00191343	13.4548	0.0224763	0.00247955	13.4548	0.024356	0.00184945	13.4541	0.0247624	0.00188294	13.4548	0.0254	0.00293011	13.455	0.0256414	0.00143498	13.4541	0.0260566	0.00259678	13.4544	0.0266563	0.00311207	13.4551	0.027387	0.00326953
13.6124	0.00301327	0.000236015	13.6123	0.00879963	0.000561443	13.6124	0.0141524	0.000940171	13.6123	0.0188697	0.00115594	13.6124	0.0205383	0.00184977	13.6122	0.0225433	0.00278513	13.6122	0.0243913	0.00234556	13.6115	0.0246992	0.00253249	13.6121	0.0252973	0.00292578	13.6124	0.0256332	0.00163525	13.6115	0.0258276	0.00309834	13.6117	0.0266589	0.00319679	13.6124	0.0273739	0.00291097
13.7698	0.00301787	0.000256151	13.7696	0.00875596	0.000657947	13.7698	0.0140702	0.000693326	13.7696	0.0187963	0.000899473	13.7697	0.0205039	0.00191126	13.7696	0.022536	0.00262912	13.7695	0.024358	0.00206057	13.7688	0.0247002	0.00196205	13.7695	0.0254244	0.00244435	13.7697	0.0256167	0.00112403	13.7688	0.0259227	0.00289402	13.7691	0.0266826	0.00366532	13.7698	0.0272727	0.00205073
13.9272	0.00301033	0.000275423	13.927	0.00877751	0.000632973	13.9271	0.0141145	0.000902362	13.927	0.0187835	0.000990664	13.9271	0.020525	0.00218766	13.9269	0.0226918	0.00278307	13.9269	0.0243686	0.0023275	13.9262	0.0248183	0.00191709	13.9268	0.0252494	0.00195557	13.9271	0.0257223	0.00113042	13.9262	0.0258984	0.00341348	13.9264	0.0266534	0.00357868	13.9272	0.0272329	0.002098
14.0845	0.00301527	0.000255062	14.0844	0.00882273	0.000698425	14.0845	0.0140962	0.000701405	14.0844	0.0189572	0.00128524	14.0845	0.0204881	0.00231523	14.0843	0.0227664	0.00295982	14.0843	0.0244407	0.00250862	14.0835	0.0247817	0.00221699	14.0842	0.025441	0.002584	14.0845	0.0255756	0.0015544	14.0836	0.025904	0.00256883	14.0838	0.0266256	0.00376219	14.0845	0.0270296	0.00187131
14.2419	0.0030212	0.000282555	14.2417	0.00882398	0.000748906	14.2419	0.0141596	0.00063323	14.2417	0.0189152	0.00108424	14.2418	0.0206944	0.00221856	14.2417	0.0226008	0.00269924	14.2416	0.0243504	0.00204582	14.2409	0.0248293	0.00183759	14.2416	0.0254363	0.00276437	14.2418	0.0255453	0.00127303	14.2409	0.0258634	0.00285617	14.2412	0.0265945	0.00311913	14.2419	0.0272891	0.00178242
14.3993	0.0030003	0.000308033	14.3991	0.00875088	0.000583453	14.3992	0.0141656	0.000722739	14.3991	0.0189524	0.000975406	14.3992	0.020811	0.00263541	14.399	0.0225422	0.00213631	14.399	0.0243979	0.00259141	14.3983	0.0248556	0.00200583	14.3989	0.0252452	0.002165	14.3992	0.0254794	0.00170114	14.3983	0.0259638	0.00222662	14.3985	0.0265138	0.0035846	14.3993	0.0270496	0.0021821
14.5566	0.00301051	0.00033458	14.5565	0.00873825	0.000528361	14.5566	0.014093	0.000687504	14.5565	0.018803	0.000914988	14.5566	0.0208553	0.0025571	14.5564	0.0224011	0.00242704	14.5564	0.0245909	0.00317259	14.5556	0.0250633	0.00220226	14.5563	0.0252573	0.00191479	14.5566	0.0256963	0.00160737	14.5556	0.0260512	0.00235236	14.5559	0.0265785	0.00356641	14.5567	0.0270527	0.0017436
14.714	0.00299966	0.000275682	14.7138	0.00872183	0.000599679	14.714	0.0141165	0.000896168	14.7138	0.0188245	0.000891647	14.714	0.0206858	0.00215641	14.7138	0.0223577	0.00211598	14.7137	0.0244916	0.00231087	14.713	0.0250075	0.00191759	14.7137	0.0253092	0.00172384	14.714	0.025734	0.00156365	14.713	0.0260562	0.00285619	14.7133	0.026681	0.00307965	14.714	0.027115	0.00106517
14.8714	0.00303691	0.000308786	14.8712	0.00878313	0.000713367	14.8713	0.0141404	0.000708581	14.8712	0.0187808	0.00113369	14.8713	0.0206622	0.00236714	14.8711	0.0224856	0.0022592	14.8711	0.024547	0.00225117	14.8703	0.0249729	0.00208388	14.871	0.0253376	0.00151453	14.8713	0.0257381	0.00187009	14.8704	0.0259307	0.00336003	14.8706	0.0267977	0.00328017	14.8714	0.0270416	0.00150285
15.0287	0.00301572	0.000273999	15.0286	0.00880446	0.000898833	15.0287	0.014105	0.000745817	15.0286	0.0188649	0.00122458	15.0287	0.0207449	0.00293312	15.0285	0.0223719	0.00266802	15.0285	0.0244796	0.00225375	15.0277	0.0251521	0.00255687	15.0284	0.0255058	0.00160021	15.0287	0.0258725	0.00165051	15.0277	0.025754	0.00409642	15.028	0.0268721	0.00348087	15.0288	0.0271723	0.00118759
15.1861	0.0030256	0.000310991	15.1859	0.0087678	0.000672284	15.1861	0.0140604	0.000742082	15.1859	0.0188825	0.000650923	15.1861	0.0208593	0.00294496	15.1859	0.0223648	0.00272019	15.1858	0.024486	0.00266914	15.185	0.0252196	0.0025132	15.1858	0.0253913	0.00171667	15.1861	0.0258497	0.00119267	15.1851	0.0259955	0.00356526	15.1853	0.0270655	0.00277809	15.1861	0.0269312	0.00130233
15.3435	0.00299115	0.000242293	15.3433	0.00880726	0.000746957	15.3435	0.014175	0.000937815	15.3433	0.018823	0.000902229	15.3434	0.0209564	0.00283969	15.3432	0.0225555	0.00279876	15.3432	0.0244941	0.00267273	15.3424	0.0252838	0.00215679	15.3431	0.0253685	0.00143577	15.3434	0.0256633	0.00165672	15.3424	0.0258035	0.00329535	15.3427	0.0269454	0.00313109	15.3435	0.026893	0.00195033
15.5008	0.00299211	0.000273392	15.5007	0.00884047	0.000942219	15.5008	0.0141405	0.00141492	15.5007	0.0187865	0.000849391	15.5008	0.0209877	0.00237076	15.5006	0.022443	0.00280031	15.5006	0.0245918	0.00276823	15.4998	0.0252635	0.0025532	15.5005	0.0255354	0.00141778	15.5008	0.0255694	0.00198158	15.4998	0.02599	0.00307348	15.5001	0.0271784	0.00341031	15.5009	0.027085	0.00223068
15.6582	0.00302538	0.000295952	15.658	0.00883723	0.000933078	15.6582	0.0141908	0.00121883	15.658	0.0189754	0.00116453	15.6582	0.0210719	0.00256985	15.658	0.022402	0.00246525	15.6579	0.0246822	0.00262265	15.6571	0.0252162	0.00258469	15.6579	0.0255389	0.00170708	15.6582	0.0258207	0.00172818	15.6571	0.0259775	0.00315691	15.6574	0.0269761	0.00345046	15.6582	0.0270469	0.00135333
15.8156	0.00302778	0.000316995	15.8154	0.00879269	0.000954009	15.8156	0.0142552	0.00129371	15.8154	0.0187886	0.000967729	15.8155	0.0209103	0.00222396	15.8153	0.0226558	0.00287336	15.8153	0.0246221	0.00267068	15.8145	0.0251547	0.00206986	15.8152	0.0254049	0.0015585	15.8155	0.0258079	0.00160457	15.8145	0.0259683	0.00299033	15.8148	0.0269588	0.00295498	15.8156	0.0270765	0.00102081
15.973	0.00302454	0.00031604	15.9728	0.00879256	0.00103344	15.9729	0.0141617	0.00112212	15.9728	0.0188779	0.00114157	15.9729	0.0209517	0.00186328	15.9727	0.0225802	0.00235687	15.9726	0.0246219	0.00282438	15.9718	0.0251366	0.00256759	15.9726	0.0252068	0.00177256	15.9729	0.0257843	0.00173412	15.9719	0.0259153	0.00254137	15.9721	0.0272367	0.00254857	15.973	0.0270545	0.000895981
16.1303	0.00303908	0.000315281	16.1301	0.00879752	0.000728087	16.1303	0.0140561	0.000633549	16.1301	0.018861	0.000917564	16.1303	0.0210202	0.00183969	16.1301	0.0226764	0.00284615	16.13	0.0245459	0.00244524	16.1292	0.0250075	0.00222821	16.13	0.0253135	0.00159046	16.1303	0.0257859	0.00226416	16.1292	0.0258516	0.00297028	16.1295	0.0271235	0.00235641	16.1303	0.0272891	0.00113668
16.2877	0.00305401	0.000218474	16.2875	0.00873871	0.000732708	16.2877	0.0141775	0.000758315	16.2875	0.018847	0.00106046	16.2876	0.0208625	0.0018116	16.2874	0.0228012	0.00309973	16.2874	0.0243778	0.00268992	16.2866	0.0249493	0.00181861	16.2873	0.0254544	0.00184302	16.2876	0.025745	0.0019943	16.2866	0.0258094	0.00295874	16.2869	0.0271661	0.0026503	16.2877	0.02725	0.00113463
16.4451	0.0030164	0.000262936	16.4449	0.00867393	0.000679978	16.445	0.0142584	0.000995885	16.4449	0.0187583	0.000977467	16.445	0.0207044	0.00145787	16.4448	0.0227053	0.00323373	16.4447	0.0244945	0.00270609	16.4439	0.0248395	0.00232019	16.4447	0.0254648	0.002052	16.445	0.0257086	0.00135915	16.4439	0.0257581	0.00331483	16.4442	0.0270446	0.00289264	16.4451	0.0272396	0.00135668
16.6024	0.00301643	0.000254042	16.6022	0.00869506	0.000702442	16.6024	0.0142399	0.000674101	16.6022	0.0187921	0.00121539	16.6024	0.0207734	0.00210158	16.6022	0.0227382	0.00297518	16.6021	0.0243983	0.00288089	16.6013	0.0247722	0.00224963	16.6021	0.0255052	0.00176519	16.6024	0.0255964	0.00225249	16.6013	0.0257496	0.0035807	16.6016	0.0270596	0.0030491	16.6025	0.0273829	0.00117517
16.7598	0.00300918	0.000229043	16.7596	0.00876082	0.000641354	16.7598	0.0142396	0.000698272	16.7596	0.0189594	0.000904275	16.7597	0.0207803	0.00188977	16.7595	0.0226993	0.00330083	16.7595	0.0243489	0.00268924	16.7586	0.0247599	0.00243213	16.7594	0.0253885	0.00158456	16.7597	0.0256987	0.00191183	16.7587	0.0259297	0.00350431	16.7589	0.0270649	0.00252612	16.7598	0.0273085	0.0015633
16.9172	0.00301834	0.000188299	16.917	0.00879669	0.000806818	16.9171	0.0141738	0.000743829	16.917	0.0188462	0.000925221	16.9171	0.0208882	0.0021228	16.9169	0.0227962	0.00284544	16.9168	0.0242611	0.00276752	16.916	0.0246666	0.00266392	16.9168	0.0254605	0.00149865	16.9171	0.025489	0.00144564	16.916	0.025789	0.0036492	16.9163	0.0269415	0.00286712	16.9172	0.0271815	0.00187364
17.0745	0.00301299	0.00014065	17.0743	0.00881074	0.000811607	17.0745	0.0141297	0.000501154	17.0743	0.018911	0.000988193	17.0745	0.0208104	0.00202669	17.0743	0.0227592	0.00296845	17.0742	0.0242017	0.00244957	17.0733	0.0246779	0.0023305	17.0742	0.0254289	0.00144314	17.0745	0.0255438	0.00187153	17.0734	0.0257763	0.00299256	17.0737	0.0273254	0.00270305	17.0746	0.0272274	0.00221467
17.2319	0.00300908	0.000172433	17.2317	0.00879624	0.000814007	17.2319	0.0141501	0.00077508	17.2317	0.0187895	0.000890426	17.2319	0.0208025	0.00198743	17.2316	0.0227282	0.00318797	17.2316	0.0244084	0.00217418	17.2307	0.0245633	0.00248043	17.2315	0.0257158	0.00174667	17.2319	0.0257203	0.00121226	17.2307	0.0257631	0.00308844	17.231	0.0274614	0.0030241	17.2319	0.0270992	0.00167424
17.3893	0.00299765	0.000207531	17.3891	0.00880959	0.000751711	17.3892	0.014016	0.000468951	17.3891	0.0188352	0.000578721	17.3892	0.0208099	0.00182408	17.389	0.0227738	0.0036091	17.3889	0.0244998	0.00203732	17.3881	0.0246422	0.00249944	17.3889	0.0257088	0.00224226	17.3892	0.0257667	0.00155428	17.3881	0.0256725	0.00320994	17.3884	0.0272848	0.00271199	17.3893	0.0271916	0.00214413
17.5466	0.00299636	0.00015522	17.5464	0.00876502	0.000819979	17.5466	0.013971	0.000688907	17.5464	0.0189272	0.000843187	17.5466	0.0208416	0.00209174	17.5464	0.0227544	0.00295134	17.5463	0.0247695	0.0021809	17.5454	0.0244036	0.00188184	17.5463	0.0257623	0.00194997	17.5466	0.0256442	0.0013109	17.5454	0.0255876	0.00324078	17.5458	0.0272412	0.00288214	17.5467	0.0269863	0.00215154
17.704	0.0030028	0.00012304	17.7038	0.00878942	0.000892546	17.704	0.0139423	0.000682199	17.7038	0.0187527	0.000573091	17.704	0.0207957	0.00164567	17.7037	0.0226516	0.00246275	17.7037	0.0246327	0.00240863	17.7028	0.0245287	0.00194171	17.7036	0.0256246	0.00242959	17.704	0.0257855	0.00179255	17.7028	0.0257817	0.00324418	17.7031	0.0273999	0.00306014	17.704	0.0271287	0.00191527
17.8614	0.00300173	0.000128607	17.8612	0.00880137	0.000774644	17.8614	0.0138876	0.000523356	17.8612	0.0186933	0.000673548	17.8613	0.020783	0.00180361	17.8611	0.0224918	0.00226429	17.861	0.0245833	0.00264075	17.8601	0.0245187	0.00232628	17.861	0.0254811	0.00229299	17.8613	0.0258215	0.00225859	17.8602	0.0257489	0.00320887	17.8605	0.0272835	0.00291629	17.8614	0.0272141	0.00194151
18.0188	0.00301601	0.000168015	18.0186	0.00880089	0.000994799	18.0187	0.0138857	0.00063299	18.0186	0.0187529	0.000584394	18.0187	0.0206985	0.00183631	18.0185	0.0224544	0.00246331	18.0184	0.0245521	0.00224783	18.0175	0.0247728	0.00233788	18.0183	0.0254616	0.00225834	18.0187	0.0260142	0.00292158	18.0175	0.0259487	0.00345232	18.0178	0.0272675	0.00269592	18.0188	0.0272288	0.00245684
18.1761	0.00302441	0.00025066	18.1759	0.00885552	0.000895118	18.1761	0.0139709	0.000897968	18.1759	0.0187456	0.000317542	18.1761	0.0206999	0.00140253	18.1758	0.0224996	0.00235583	18.1758	0.0245243	0.00185058	18.1748	0.0245921	0.00254931	18.1757	0.0256432	0.00224462	18.1761	0.0261152	0.00287117	18.1749	0.02581	0.0033447	18.1752	0.0271629	0.00275137	18.1761	0.0270533	0.00235193
18.3335	0.00300916	0.000155248	18.3333	0.00879281	0.000754906	18.3335	0.0139318	0.000855781	18.3333	0.0187637	0.000441632	18.3334	0.0207602	0.00155161	18.3332	0.0225236	0.00234498	18.3331	0.0245217	0.0017715	18.3322	0.0245254	0.0022245	18.3331	0.0255327	0.00281346	18.3334	0.0259312	0.00252823	18.3322	0.0258299	0.0027635	18.3326	0.0273576	0.00307084	18.3335	0.0270286	0.00221888
18.4909	0.00300071	9.00423e-05	18.4907	0.00880768	0.000798159	18.4908	0.0139307	0.000794945	18.4907	0.0188732	0.000756423	18.4908	0.0206951	0.00181459	18.4906	0.0226712	0.00221493	18.4905	0.0246616	0.00219609	18.4896	0.0246192	0.00187217	18.4904	0.0254333	0.00258502	18.4908	0.0258958	0.00200255	18.4896	0.0257546	0.00272058	18.4899	0.0272525	0.00312046	18.4909	0.0267605	0.00183272
18.6482	0.00302057	0.000101751	18.648	0.00879113	0.000646241	18.6482	0.0139595	0.000971275	18.648	0.0189718	0.000944567	18.6482	0.0207064	0.00208466	18.6479	0.0226388	0.0019348	18.6479	0.024686	0.00208347	18.6469	0.024425	0.00131162	18.6478	0.0254984	0.0023416	18.6482	0.0259831	0.00232395	18.647	0.0257634	0.00317054	18.6473	0.0270337	0.00332035	18.6483	0.0270165	0.00179591
18.8056	0.00304078	0.000159174	18.8054	0.00875234	0.000680729	18.8056	0.0139717	0.00049046	18.8054	0.0189282	0.00133684	18.8055	0.020688	0.00183994	18.8053	0.0225706	0.00132558	18.8052	0.0246159	0.00217931	18.8043	0.0243438	0.00216742	18.8052	0.0257019	0.00273606	18.8055	0.0260076	0.00259343	18.8043	0.0258519	0.00264808	18.8046	0.027066	0.00357931	18.8056	0.0270487	0.00177413
18.963	0.00303492	0.000139377	18.9628	0.00878298	0.000609057	18.9629	0.0139412	0.000476158	18.9628	0.0189855	0.00130474	18.9629	0.0207194	0.00176938	18.9627	0.0226115	0.00212376	18.9626	0.0244037	0.00170895	18.9616	0.0244638	0.00179347	18.9625	0.0256274	0.00267349	18.9629	0.0258008	0.00167384	18.9617	0.0257334	0.00286265	18.962	0.0270694	0.00348905	18.963	0.027177	0.00232566
19.1203	0.0030311	0.000187189	19.1201	0.00874057	0.000475247	19.1203	0.0139357	0.000548597	19.1201	0.0190386	0.00124651	19.1203	0.0207187	0.00164232	19.12	0.0224905	0.00225654	19.12	0.0242331	0.0012635	19.119	0.0243709	0.0014082	19.1199	0.0256151	0.00189717	19.1203	0.0259066	0.00188747	19.119	0.0258311	0.00252382	19.1194	0.0271065	0.00324108	19.1204	0.0271206	0.00140934
19.2777	0.00301998	0.000172996	19.2775	0.00879423	0.000590607	19.2777	0.0139128	0.00050247	19.2775	0.0190844	0.00126603	19.2776	0.0208414	0.00161982	19.2774	0.0227659	0.00231324	19.2773	0.0243463	0.001219	19.2764	0.0245951	0.000841456	19.2773	0.0255448	0.00240731	19.2776	0.0258892	0.00242764	19.2764	0.0257719	0.00148719	19.2767	0.0271816	0.00244169	19.2777	0.0270924	0.00152882
19.4351	0.0030308	0.000132474	19.4349	0.00877282	0.000633297	19.435	0.0139741	0.000532463	19.4349	0.0190276	0.000818682	19.435	0.0208545	0.00136078	19.4348	0.0226579	0.00185945	19.4347	0.0242314	0.00133774	19.4337	0.0248246	0.0013802	19.4346	0.0256139	0.00196231	19.435	0.0258214	0.00260697	19.4337	0.0254096	0.00175081	19.4341	0.0271463	0.00302821	19.4351	0.0270793	0.00232372
19.5924	0.00302761	0.000167178	19.5922	0.00871458	0.000534592	19.5924	0.0139547	0.000705783	19.5922	0.0189928	0.000912311	19.5924	0.0208829	0.00143635	19.5921	0.022701	0.0019803	19.5921	0.0241259	0.0017298	19.5911	0.0247243	0.00146342	19.592	0.0254935	0.00202662	19.5924	0.0259127	0.00231116	19.5911	0.0257855	0.0017969	19.5914	0.0270378	0.00307381	19.5925	0.0270581	0.0022237
19.7498	0.00304202	0.000150177	19.7496	0.00872015	0.000534084	19.7498	0.0139044	0.000595303	19.7496	0.018938	0.00114431	19.7497	0.0209433	0.00162381	19.7495	0.0224663	0.00182612	19.7494	0.0242419	0.00175253	19.7484	0.0246205	0.00138216	19.7494	0.0253587	0.00172688	19.7497	0.0258963	0.0021429	19.7485	0.025615	0.00191269	19.7488	0.0271679	0.00241508	19.7498	0.026932	0.00261747
19.9072	0.00306387	0.000196916	19.907	0.00870892	0.000389577	19.9071	0.0140257	0.000734266	19.907	0.0190123	0.00143128	19.9071	0.0210912	0.00197444	19.9069	0.0223853	0.00181011	19.9068	0.0242678	0.00165702	19.9058	0.024323	0.00140261	19.9067	0.0254846	0.00224967	19.9071	0.0260374	0.0021838	19.9058	0.0259135	0.00202466	19.9062	0.0272651	0.0026062	19.9072	0.0269924	0.00309334

## Sheet: T=0.8Tc,W=1.08kTc
y-coordinate, averaged density profile ρf*(y), and uncertainty of the averaged density profile Δρf*(y) of the adsorption isotherm for:
T / Tc = 0.8,
ρs / σf-3 = 1.07, and
Ϛ = 0.35.
The averaged density profiles are indicated with the respective bulk fluid pressure pfb / esf-3.
pfb / esf-3 =	0.002770(37)		pfb / esf-3 =	0.00798(13)		pfb / esf-3 =	0.01262(35)		pfb / esf-3 =	0.01688(28)		pfb / esf-3 =	0.0205(9)		pfb / esf-3 =	0.0234(7)		pfb / esf-3 =	0.0269(5)		pfb / esf-3 =	0.02955(36)		pfb / esf-3 =	0.0320(8)
y / σf	ρf*(y) / σf-3	Δρf*(y) / σf-3	y / σf	ρf*(y) / σf-3	Δρf*(y) / σf-3	y / σf	ρf*(y) / σf-3	Δρf*(y) / σf-3	y / σf	ρf*(y) / σf-3	Δρf*(y) / σf-3	y / σf	ρf*(y) / σf-3	Δρf*(y) / σf-3	y / σf	ρf*(y) / σf-3	Δρf*(y) / σf-3	y / σf	ρf*(y) / σf-3	Δρf*(y) / σf-3	y / σf	ρf*(y) / σf-3	Δρf*(y) / σf-3	y / σf	ρf*(y) / σf-3	Δρf*(y) / σf-3
4.79975	0	0	4.7997	3.25258e-06	1.11397e-05	4.79975	3.24396e-06	4.20059e-06	4.7997	3.01137e-06	1.10806e-05	4.79968	0	0	4.79942	1.25668e-05	5.4649e-06	4.79974	0	0	4.79951	0	0	4.79962	0	0
4.95712	0	0	4.95707	5.48008e-06	1.97018e-05	4.95712	4.89294e-06	4.81865e-06	4.95707	4.33042e-06	7.98829e-06	4.95704	0	0	4.95678	1.08374e-05	4.42808e-06	4.95711	0	0	4.95687	0	0	4.95699	0	0
5.11449	7.42608e-08	4.45565e-07	5.11444	2.20016e-06	1.06519e-05	5.11448	6.953e-06	9.99326e-06	5.11444	4.64946e-06	8.75052e-06	5.11441	0	0	5.11414	1.66373e-05	4.04556e-06	5.11448	0	0	5.11423	0	0	5.11435	0	0
5.27186	5.02421e-06	1.55705e-06	5.2718	1.56628e-05	3.15642e-06	5.27185	3.00457e-05	7.61238e-06	5.2718	3.90147e-05	1.32733e-05	5.27178	4.09401e-05	8.74021e-06	5.27149	6.91611e-05	1.32923e-05	5.27184	5.74394e-05	1.23637e-05	5.27159	6.51792e-05	2.17397e-05	5.27172	7.13846e-05	1.6878e-05
5.42923	0.000748632	4.26281e-05	5.42917	0.00221284	0.000190633	5.42922	0.00366105	0.000443446	5.42917	0.00515793	0.000435711	5.42914	0.00646475	0.000349866	5.42885	0.00739463	0.000985396	5.42921	0.00869816	0.00096111	5.42895	0.0103208	0.00102139	5.42908	0.0114698	0.000867692
5.5866	0.00617129	0.000386441	5.58654	0.0179755	0.00180865	5.58659	0.0297094	0.00316212	5.58654	0.0417845	0.00420291	5.58651	0.053058	0.00447169	5.58621	0.0603143	0.00924959	5.58658	0.0710409	0.00820002	5.58632	0.0834902	0.00873884	5.58645	0.0924024	0.00709787
5.74397	0.0109259	0.000880708	5.7439	0.0318793	0.00287591	5.74396	0.0526246	0.00658187	5.7439	0.0742174	0.00687076	5.74388	0.0931917	0.00647404	5.74357	0.106781	0.0168674	5.74395	0.125363	0.0149285	5.74368	0.147775	0.0154582	5.74381	0.162467	0.0119962
5.90134	0.00831977	0.00049746	5.90127	0.0243754	0.00205397	5.90133	0.0401015	0.00510739	5.90127	0.0565071	0.00509174	5.90124	0.0709947	0.00395819	5.90092	0.0818468	0.0124804	5.90132	0.0960911	0.0106939	5.90104	0.113717	0.0126485	5.90118	0.125443	0.00935238
6.05871	0.00586408	0.000260159	6.05864	0.0171186	0.00131389	6.0587	0.0284545	0.00369699	6.05864	0.0398644	0.00381319	6.05861	0.0506788	0.00280275	6.05828	0.0583889	0.00840127	6.05869	0.0690485	0.0073876	6.0584	0.0817971	0.00888306	6.05854	0.090864	0.00698209
6.21608	0.00462404	0.000223821	6.21601	0.013604	0.000990922	6.21607	0.0227185	0.00272747	6.21601	0.0318544	0.00277157	6.21598	0.0407969	0.0023581	6.21564	0.0472317	0.00735696	6.21606	0.056376	0.00589746	6.21576	0.0670988	0.00816553	6.21591	0.0748682	0.0055843
6.37344	0.00402177	0.000229025	6.37337	0.0118733	0.00070306	6.37343	0.0200859	0.002528	6.37337	0.0282816	0.0019549	6.37334	0.0364844	0.00256225	6.373	0.0425441	0.00664311	6.37342	0.0510139	0.00542933	6.37312	0.0617438	0.00852578	6.37327	0.0689571	0.00576185
6.53081	0.00373233	0.000186011	6.53074	0.011076	0.00069501	6.5308	0.0189654	0.00231232	6.53074	0.0268983	0.00178906	6.53071	0.0350841	0.00289866	6.53036	0.0410098	0.00650461	6.53079	0.0499524	0.00641869	6.53048	0.0615259	0.00831661	6.53064	0.0691755	0.00531245
6.68818	0.00355442	0.000179703	6.68811	0.0107115	0.000801853	6.68817	0.0184137	0.00221755	6.68811	0.0264237	0.00182422	6.68808	0.0344808	0.00282691	6.68771	0.040763	0.00673838	6.68816	0.0497886	0.00661079	6.68784	0.0623938	0.00937426	6.688	0.0710852	0.00594935
6.84555	0.00344438	0.000197447	6.84548	0.0103324	0.000499807	6.84554	0.0178719	0.00245504	6.84548	0.0257649	0.0019589	6.84544	0.0336954	0.00262781	6.84507	0.039766	0.00655735	6.84553	0.0486833	0.00592393	6.8452	0.0612444	0.0101452	6.84537	0.0701073	0.00596079
7.00292	0.0033833	0.000164774	7.00284	0.0100821	0.000450544	7.00291	0.0173479	0.00238032	7.00284	0.0250333	0.00183829	7.00281	0.0324584	0.00242625	7.00243	0.0381607	0.00631167	7.0029	0.0469926	0.00651729	7.00256	0.0583475	0.00918576	7.00273	0.0665067	0.0049239
7.16029	0.00334666	0.000195835	7.16021	0.00993216	0.000531137	7.16028	0.0169136	0.00214825	7.16021	0.0242156	0.0020388	7.16018	0.0314733	0.00317223	7.15979	0.0366511	0.00509766	7.16027	0.0451626	0.00611208	7.15993	0.0555264	0.00808745	7.1601	0.0635894	0.0042081
7.31766	0.0033212	0.00018921	7.31758	0.00984972	0.00049763	7.31765	0.0166785	0.00228493	7.31758	0.0238162	0.00202531	7.31754	0.0306849	0.00293359	7.31715	0.0354356	0.0047391	7.31764	0.0439042	0.00530716	7.31729	0.0541175	0.00741428	7.31746	0.061942	0.00388572
7.47503	0.00330799	0.000216476	7.47494	0.00985049	0.000640376	7.47502	0.0165042	0.0021384	7.47494	0.0235521	0.00184145	7.47491	0.030232	0.0030126	7.4745	0.0350487	0.00444876	7.475	0.0428342	0.00501649	7.47465	0.052933	0.00783301	7.47483	0.0605823	0.00329425
7.6324	0.00329272	0.000234136	7.63231	0.00978493	0.000352243	7.63238	0.0164367	0.00194168	7.63231	0.023345	0.00195883	7.63228	0.0298919	0.00284939	7.63186	0.034872	0.00448523	7.63237	0.0424211	0.00541149	7.63201	0.0522517	0.0076951	7.63219	0.0597115	0.00328739
7.78977	0.00329379	0.000226608	7.78968	0.00970411	0.00026274	7.78975	0.0164104	0.00178726	7.78968	0.0232535	0.00164945	7.78964	0.0297909	0.00323624	7.78922	0.0346736	0.00492886	7.78974	0.0419662	0.00516472	7.78937	0.0519939	0.00780628	7.78956	0.0588556	0.00304674
7.94713	0.00330228	0.000277827	7.94705	0.00971882	0.00035244	7.94712	0.01638	0.00178815	7.94705	0.0230687	0.0014962	7.94701	0.0297054	0.00325655	7.94658	0.0342568	0.00452782	7.94711	0.0418109	0.00572093	7.94673	0.0513461	0.00705124	7.94692	0.057857	0.0029495
8.1045	0.00330143	0.000290284	8.10441	0.00965293	0.000508093	8.10449	0.0162634	0.00184329	8.10441	0.0229741	0.00127014	8.10437	0.0294757	0.00293074	8.10394	0.0341872	0.00441904	8.10448	0.0411779	0.00524558	8.10409	0.050838	0.00682466	8.10428	0.0572364	0.00293475
8.26187	0.00328256	0.000231482	8.26178	0.00971521	0.00050298	8.26186	0.0162743	0.00177279	8.26178	0.0228769	0.00155213	8.26174	0.0292579	0.00334628	8.2613	0.034186	0.0039546	8.26185	0.040656	0.00479142	8.26145	0.0505197	0.00726597	8.26165	0.0563147	0.0032281
8.41924	0.00329632	0.000244942	8.41915	0.0097221	0.000496903	8.41923	0.0163413	0.00194527	8.41915	0.022775	0.00133279	8.41911	0.0292363	0.00305675	8.41865	0.0339975	0.0040317	8.41921	0.0405214	0.00551908	8.41881	0.04999	0.0073479	8.41901	0.0556332	0.00298971
8.57661	0.00328775	0.000304566	8.57652	0.00975093	0.000528609	8.5766	0.0162704	0.00185372	8.57652	0.0226746	0.0011889	8.57647	0.029157	0.00274644	8.57601	0.0339082	0.0039591	8.57658	0.040398	0.00483105	8.57617	0.0496789	0.0080584	8.57638	0.0553873	0.00315115
8.73398	0.0033012	0.000238367	8.73388	0.00976491	0.000591075	8.73397	0.0162473	0.00174476	8.73388	0.0225575	0.00113202	8.73384	0.0292252	0.0031493	8.73337	0.0338234	0.00403275	8.73395	0.0400505	0.0050337	8.73354	0.0494278	0.00687829	8.73374	0.0551799	0.00335999
8.89135	0.00329656	0.00025798	8.89125	0.00974796	0.000639419	8.89133	0.0163359	0.00189844	8.89125	0.0227653	0.00126875	8.89121	0.0294042	0.00316468	8.89073	0.0336785	0.00416325	8.89132	0.0400445	0.00477257	8.8909	0.0492121	0.00688714	8.89111	0.0548349	0.00364463
9.04872	0.00331305	0.000247767	9.04862	0.00971172	0.000503417	9.0487	0.0162535	0.00179775	9.04862	0.0227073	0.0012214	9.04857	0.0291423	0.0029743	9.04809	0.0340718	0.00475474	9.04869	0.0398918	0.00481605	9.04826	0.0492475	0.00722364	9.04847	0.0545945	0.00311382
9.20609	0.00330541	0.000265673	9.20598	0.00968948	0.000540887	9.20607	0.0162568	0.00175477	9.20598	0.022717	0.00173974	9.20594	0.0290989	0.00286955	9.20544	0.0336786	0.00415114	9.20606	0.0399003	0.00352128	9.20562	0.0486671	0.00594746	9.20584	0.0544697	0.00321861
9.36346	0.00330575	0.000212967	9.36335	0.00972797	0.00052463	9.36344	0.01633	0.00184085	9.36335	0.0227775	0.00156997	9.36331	0.0288568	0.00279764	9.3628	0.0338029	0.00374714	9.36343	0.0399971	0.00364962	9.36298	0.0483779	0.00704093	9.3632	0.0541946	0.00367892
9.52082	0.00331717	0.000163887	9.52072	0.00976826	0.000474354	9.52081	0.0162036	0.00150503	9.52072	0.0227738	0.000893281	9.52067	0.0290183	0.0027974	9.52016	0.0338674	0.00395975	9.52079	0.0401275	0.00408499	9.52034	0.0483651	0.0068559	9.52057	0.0541675	0.00378247
9.67819	0.00332485	0.00013834	9.67809	0.00970981	0.000402849	9.67818	0.0161444	0.0015167	9.67809	0.0227525	0.000874738	9.67804	0.0290839	0.00213888	9.67752	0.0337486	0.0036132	9.67816	0.0401656	0.0037767	9.6777	0.0483097	0.00716269	9.67793	0.0542009	0.00351275
9.83556	0.0033175	0.000217799	9.83545	0.00974424	0.000626172	9.83555	0.0160773	0.00161205	9.83545	0.0227111	0.00119354	9.83541	0.029085	0.00245919	9.83488	0.0337247	0.00329046	9.83553	0.0401307	0.00395872	9.83506	0.048316	0.00721186	9.8353	0.0538284	0.00347384
9.99293	0.00329475	0.000198313	9.99282	0.00980368	0.000660839	9.99292	0.0160905	0.00138047	9.99282	0.0227393	0.00100836	9.99277	0.029003	0.00273616	9.99223	0.0336884	0.00394934	9.9929	0.0400399	0.00348941	9.99242	0.0486475	0.00711166	9.99266	0.0537535	0.00457719
10.1503	0.00329678	0.000227131	10.1502	0.00973073	0.000751471	10.1503	0.0160664	0.00143138	10.1502	0.0226621	0.000980379	10.1501	0.0290371	0.00353946	10.1496	0.0338145	0.00375075	10.1503	0.0401077	0.00339969	10.1498	0.0483094	0.00673497	10.15	0.0538304	0.00387153
10.3077	0.00329691	0.000192336	10.3076	0.00973065	0.000690786	10.3077	0.0161608	0.00175727	10.3076	0.0227282	0.00164281	10.3075	0.0291705	0.00370222	10.3069	0.0339308	0.00357423	10.3076	0.0398624	0.00397539	10.3071	0.0485201	0.00658725	10.3074	0.0534349	0.00385301
10.465	0.00329115	0.000255865	10.4649	0.00976678	0.000646081	10.465	0.0161595	0.00152892	10.4649	0.0227623	0.00158098	10.4649	0.0291607	0.00330884	10.4643	0.0336574	0.00399791	10.465	0.0398705	0.00359328	10.4645	0.0484509	0.00654704	10.4648	0.0532076	0.00464107
10.6224	0.00330902	0.000269538	10.6223	0.00979355	0.000723829	10.6224	0.0161896	0.00156697	10.6223	0.0226771	0.00138626	10.6222	0.0291081	0.0034744	10.6217	0.0337946	0.00399251	10.6224	0.0398978	0.00304096	10.6219	0.0483381	0.00682441	10.6221	0.0533426	0.00617544
10.7798	0.00331006	0.000284337	10.7797	0.00973467	0.000647948	10.7798	0.0162616	0.0015428	10.7797	0.0226212	0.00174501	10.7796	0.0291817	0.00320609	10.779	0.033821	0.0043637	10.7797	0.0398523	0.0021846	10.7792	0.0480027	0.00589363	10.7795	0.0530364	0.00615056
10.9371	0.00330932	0.000282294	10.937	0.00970894	0.000749639	10.9371	0.0161502	0.00157029	10.937	0.0225964	0.00137609	10.937	0.0292148	0.00305552	10.9364	0.0337331	0.0039392	10.9371	0.0400986	0.00382853	10.9366	0.0480392	0.00557155	10.9369	0.0529829	0.00536189
11.0945	0.00328633	0.000274368	11.0944	0.00970104	0.000548451	11.0945	0.0162299	0.00175158	11.0944	0.022566	0.0013371	11.0943	0.0289203	0.00317751	11.0937	0.0337044	0.00426761	11.0945	0.0399352	0.00353064	11.094	0.0484656	0.00501372	11.0942	0.0530248	0.00395236
11.2519	0.00325011	0.000218534	11.2518	0.00977373	0.000553051	11.2519	0.0163271	0.00197489	11.2518	0.0226515	0.00104848	11.2517	0.0291244	0.00337165	11.2511	0.0336128	0.00440452	11.2518	0.0399542	0.00331199	11.2513	0.0482159	0.00541779	11.2516	0.0530675	0.00520862
11.4093	0.00327054	0.000193028	11.4091	0.00978813	0.000591042	11.4092	0.0162789	0.00173747	11.4091	0.0225249	0.000966122	11.4091	0.0292619	0.00369194	11.4085	0.0336533	0.00390862	11.4092	0.0400038	0.003833	11.4087	0.048055	0.00487693	11.4089	0.0531255	0.00407433
11.5666	0.00325487	0.000152348	11.5665	0.00980734	0.00067039	11.5666	0.0161982	0.00141537	11.5665	0.0224959	0.00109315	11.5664	0.029363	0.00419358	11.5658	0.033511	0.00392499	11.5666	0.0400621	0.00348692	11.566	0.047725	0.0049073	11.5663	0.053132	0.00453344
11.724	0.00326998	0.000182139	11.7239	0.00983507	0.000696438	11.724	0.0162725	0.00158734	11.7239	0.0225705	0.000755669	11.7238	0.0293632	0.00386551	11.7232	0.0335382	0.00394722	11.724	0.039934	0.00274777	11.7234	0.0479674	0.00491752	11.7237	0.053157	0.0036031
11.8814	0.00328369	0.000168597	11.8812	0.00982152	0.000718381	11.8813	0.0162651	0.00149833	11.8812	0.0225239	0.0010314	11.8812	0.0291968	0.00361758	11.8805	0.0334768	0.00352177	11.8813	0.03982	0.00349417	11.8808	0.0480638	0.00481156	11.881	0.0532182	0.00314315
12.0387	0.00327564	0.000105881	12.0386	0.00981758	0.000491083	12.0387	0.0163145	0.0016477	12.0386	0.0226523	0.0011656	12.0385	0.0293808	0.00409802	12.0379	0.0336791	0.00330479	12.0387	0.0398426	0.00363849	12.0381	0.0479745	0.00463091	12.0384	0.0532534	0.00321765
12.1961	0.00326429	9.34286e-05	12.196	0.00981713	0.00067231	12.1961	0.0162937	0.00137871	12.196	0.0224529	0.000695168	12.1959	0.0293597	0.0038731	12.1952	0.0337993	0.00358282	12.1961	0.0399417	0.00387651	12.1955	0.0475989	0.00468712	12.1958	0.0530782	0.00420544
12.3535	0.00324117	0.000110337	12.3533	0.00983139	0.000646621	12.3534	0.0162406	0.00101411	12.3533	0.0224326	0.000996203	12.3533	0.0293804	0.00415914	12.3526	0.0337496	0.00322215	12.3534	0.040224	0.00380615	12.3528	0.0478301	0.00541691	12.3531	0.0534967	0.00410231
12.5108	0.00325408	0.000124366	12.5107	0.00985426	0.000756434	12.5108	0.0162301	0.00111577	12.5107	0.0226566	0.00112381	12.5106	0.0291499	0.00375277	12.51	0.0336219	0.00386268	12.5108	0.0402287	0.0042801	12.5102	0.0477452	0.00657711	12.5105	0.0536253	0.00453176
12.6682	0.00329705	0.000174903	12.6681	0.00985788	0.000735759	12.6682	0.0162942	0.00119363	12.6681	0.0225964	0.00131119	12.668	0.029168	0.00377739	12.6673	0.0337909	0.00487266	12.6682	0.0401454	0.00437502	12.6676	0.0475588	0.00666666	12.6679	0.0536928	0.00405543
12.8256	0.00331364	0.000101326	12.8254	0.00986946	0.000725092	12.8256	0.0163364	0.00149606	12.8254	0.0226577	0.00162853	12.8254	0.029201	0.00401869	12.8247	0.0340523	0.00391883	12.8255	0.0401056	0.00478984	12.8249	0.0477552	0.0066909	12.8252	0.0535282	0.00391547
12.9829	0.00329889	0.000104022	12.9828	0.00986145	0.000631377	12.9829	0.016372	0.00151103	12.9828	0.0227451	0.00184881	12.9827	0.0291122	0.00382186	12.982	0.0340194	0.00399619	12.9829	0.0402555	0.00453669	12.9823	0.0474965	0.00674829	12.9826	0.0535571	0.00384272
13.1403	0.00329504	0.000118621	13.1402	0.00985899	0.000513408	13.1403	0.0163095	0.00153347	13.1402	0.0227356	0.00148382	13.1401	0.0288929	0.00347937	13.1394	0.0341513	0.00368484	13.1403	0.0397619	0.00375372	13.1396	0.0478332	0.0067785	13.14	0.0532525	0.00355494
13.2977	0.00329461	7.20505e-05	13.2975	0.00983002	0.000606729	13.2977	0.0162232	0.00127053	13.2975	0.0227554	0.00148702	13.2975	0.0288283	0.00316156	13.2968	0.0339889	0.00326254	13.2976	0.0398067	0.00300577	13.297	0.0479831	0.00721514	13.2973	0.0533497	0.00313614
13.455	0.0033167	0.00012592	13.4549	0.00982935	0.00068304	13.455	0.0161633	0.0011102	13.4549	0.0229613	0.00161659	13.4548	0.0289474	0.0032472	13.4541	0.0338556	0.00332304	13.455	0.0399253	0.00307556	13.4544	0.0479241	0.00680297	13.4547	0.0531629	0.00257696
13.6124	0.00330982	0.00012892	13.6123	0.00977578	0.000506829	13.6124	0.0162967	0.00131921	13.6123	0.0228423	0.00170276	13.6122	0.0289637	0.00306866	13.6115	0.0339359	0.00365272	13.6124	0.040029	0.0036254	13.6117	0.0478103	0.00777727	13.6121	0.0532048	0.00385616
13.7698	0.00329708	0.000163627	13.7696	0.00985706	0.000608491	13.7698	0.0162698	0.00123846	13.7696	0.0228771	0.00185036	13.7696	0.0289365	0.00275156	13.7688	0.0342371	0.00367071	13.7697	0.0399308	0.0039222	13.7691	0.0480281	0.00713298	13.7694	0.0534638	0.00346979
13.9272	0.00330989	0.000179371	13.927	0.00984113	0.000747515	13.9271	0.0162128	0.00131054	13.927	0.02288	0.00155644	13.9269	0.0288817	0.00310524	13.9262	0.0342018	0.00346133	13.9271	0.0402793	0.00509878	13.9264	0.0478514	0.00753543	13.9268	0.0536439	0.0033115
14.0845	0.00329981	0.000103321	14.0844	0.00980851	0.000727787	14.0845	0.016175	0.00147416	14.0844	0.0228564	0.00186733	14.0843	0.0289249	0.00289464	14.0835	0.0341199	0.00284209	14.0845	0.0398633	0.00490216	14.0838	0.0477192	0.0073378	14.0841	0.0535651	0.00174375
14.2419	0.0032927	0.000109643	14.2417	0.00977204	0.000544094	14.2419	0.0161372	0.00101703	14.2417	0.022842	0.00206214	14.2417	0.0289381	0.00286885	14.2409	0.0341619	0.0029529	14.2418	0.0400118	0.00417101	14.2412	0.047542	0.00686073	14.2415	0.0539879	0.00231038
14.3993	0.00332674	0.00015517	14.3991	0.00979293	0.0004757	14.3992	0.0161203	0.0011222	14.3991	0.0226767	0.00200092	14.399	0.0291138	0.00331965	14.3983	0.0343131	0.00366451	14.3992	0.0398988	0.00342177	14.3985	0.0475758	0.00628433	14.3989	0.0539285	0.00300002
14.5566	0.00332142	0.00011548	14.5565	0.00977294	0.000549922	14.5566	0.0162991	0.0011131	14.5565	0.02273	0.0017317	14.5564	0.0290217	0.00330604	14.5556	0.0342923	0.0034456	14.5566	0.03982	0.00421214	14.5559	0.0478243	0.00615203	14.5562	0.054132	0.0026256
14.714	0.00332588	0.000112626	14.7138	0.00981625	0.000563988	14.714	0.0163256	0.00110247	14.7138	0.0228972	0.00233532	14.7138	0.0290262	0.00315258	14.713	0.0341939	0.0027697	14.714	0.0398844	0.00360003	14.7133	0.0480793	0.00671649	14.7136	0.0539568	0.00245231
14.8714	0.0033205	0.000132077	14.8712	0.00986458	0.000573162	14.8713	0.0162722	0.00133784	14.8712	0.0228599	0.00233122	14.8711	0.0291668	0.00330878	14.8703	0.0341774	0.00343049	14.8713	0.0399338	0.00336388	14.8706	0.0480604	0.00694715	14.871	0.0540839	0.00292483
15.0287	0.0033138	0.000193314	15.0286	0.0098552	0.000663554	15.0287	0.0162388	0.00130773	15.0286	0.0230086	0.0024428	15.0285	0.0289831	0.00292957	15.0277	0.0341544	0.00343408	15.0287	0.0397623	0.00392747	15.028	0.0478442	0.00656989	15.0283	0.0543725	0.00294957
15.1861	0.00332881	0.000209037	15.1859	0.00983133	0.000570429	15.1861	0.0162107	0.00132679	15.1859	0.0227091	0.00202735	15.1859	0.0291603	0.00309643	15.185	0.0341106	0.00433552	15.1861	0.0394531	0.00406442	15.1853	0.0480475	0.00650086	15.1857	0.0542953	0.0024101
15.3435	0.00334434	0.000212481	15.3433	0.00989957	0.000585581	15.3435	0.0163399	0.00153852	15.3433	0.0228851	0.00194505	15.3432	0.0292327	0.00332614	15.3424	0.0340693	0.00413442	15.3434	0.0395862	0.00380048	15.3427	0.0478492	0.00610229	15.3431	0.054286	0.0024442
15.5008	0.00332657	0.000207777	15.5007	0.00988327	0.000671257	15.5008	0.0162755	0.00153568	15.5007	0.0229388	0.00177622	15.5006	0.0293161	0.00338546	15.4998	0.0340414	0.00354364	15.5008	0.0395917	0.0038584	15.5001	0.0476524	0.00597069	15.5004	0.0546597	0.00210339
15.6582	0.00331546	0.000199551	15.658	0.0099203	0.000843043	15.6582	0.016294	0.00116356	15.658	0.0228455	0.000985516	15.658	0.0292447	0.00349024	15.6571	0.0339554	0.00347823	15.6582	0.0399874	0.00425798	15.6574	0.0478538	0.0057015	15.6578	0.0544321	0.00279924
15.8156	0.00333281	0.000187213	15.8154	0.0098612	0.000566421	15.8156	0.0162813	0.00108654	15.8154	0.0228939	0.00169831	15.8153	0.0293243	0.00361975	15.8145	0.0339438	0.00388413	15.8155	0.0397248	0.00301087	15.8148	0.0475526	0.00581646	15.8152	0.0547567	0.00324307
15.973	0.0033314	0.000200073	15.9728	0.00980516	0.000608197	15.9729	0.0162604	0.00118561	15.9728	0.0228789	0.00153343	15.9727	0.0292553	0.00339334	15.9718	0.0338269	0.00301838	15.9729	0.0399022	0.0032302	15.9721	0.0475468	0.00592655	15.9725	0.0547568	0.00261134
16.1303	0.00332751	0.000194225	16.1301	0.00982979	0.000566012	16.1303	0.0163203	0.000993279	16.1301	0.0227638	0.0015715	16.1301	0.0293422	0.0036189	16.1292	0.034056	0.00295641	16.1303	0.0398862	0.00336661	16.1295	0.0476134	0.00625463	16.1299	0.0547169	0.00202828
16.2877	0.00331638	0.000202648	16.2875	0.0098316	0.000370162	16.2877	0.0163135	0.000845242	16.2875	0.0228925	0.00169386	16.2874	0.0292314	0.00374143	16.2866	0.0339224	0.0030642	16.2876	0.0399207	0.0040117	16.2869	0.0476242	0.00524537	16.2873	0.0548551	0.00264358
16.4451	0.00332227	0.000183299	16.4449	0.00982942	0.000394761	16.445	0.0164159	0.00111733	16.4449	0.0226395	0.00164829	16.4448	0.0291762	0.00392704	16.4439	0.0338926	0.00343348	16.445	0.0400439	0.0035186	16.4442	0.0476122	0.00500597	16.4446	0.0544914	0.00287954
16.6024	0.00333327	0.000180224	16.6022	0.00988692	0.000595749	16.6024	0.016396	0.00133698	16.6022	0.0227388	0.00164275	16.6022	0.029135	0.00374436	16.6013	0.0339439	0.00351611	16.6024	0.0399271	0.00401868	16.6016	0.0478579	0.00527981	16.602	0.0549406	0.00301908
16.7598	0.00335389	0.000265409	16.7596	0.00986652	0.000493839	16.7598	0.0163802	0.00106926	16.7596	0.0226618	0.00145416	16.7595	0.0291047	0.0036602	16.7586	0.0338587	0.00311379	16.7597	0.0399167	0.00389371	16.7589	0.0477072	0.00456649	16.7593	0.0552395	0.00411907
16.9172	0.00335905	0.000256386	16.917	0.00983516	0.000500971	16.9171	0.0163683	0.000879701	16.917	0.0225495	0.00113703	16.9169	0.0290834	0.00377893	16.916	0.0338263	0.00332568	16.9171	0.0400539	0.00428032	16.9163	0.0478019	0.00496866	16.9167	0.0552204	0.00432148
17.0745	0.00335534	0.000200617	17.0743	0.0098974	0.000580212	17.0745	0.0162777	0.000805207	17.0743	0.0225891	0.00111232	17.0743	0.0291934	0.00349764	17.0733	0.0339954	0.00305357	17.0745	0.0404114	0.00495136	17.0737	0.0478681	0.00542148	17.0741	0.055234	0.00405698
17.2319	0.0033359	0.000191279	17.2317	0.00988184	0.0006709	17.2319	0.0162172	0.000870414	17.2317	0.0226145	0.000997547	17.2316	0.02922	0.00372757	17.2307	0.0342251	0.0037562	17.2319	0.040366	0.0044747	17.231	0.0476847	0.00447375	17.2314	0.0551034	0.00398576
17.3893	0.00332949	0.000195897	17.3891	0.00987945	0.000559152	17.3892	0.0161909	0.000749897	17.3891	0.0226162	0.00135426	17.389	0.0291654	0.00340075	17.3881	0.034126	0.00278031	17.3892	0.0403582	0.00438749	17.3884	0.0476892	0.00441475	17.3888	0.054789	0.00319666
17.5466	0.00333442	0.000205883	17.5464	0.00991267	0.000543657	17.5466	0.0162096	0.000932605	17.5464	0.0226785	0.00180496	17.5464	0.0293622	0.00358121	17.5454	0.0341552	0.00280616	17.5466	0.0407673	0.00452691	17.5458	0.0478278	0.0056489	17.5462	0.0549977	0.00354812
17.704	0.00334675	0.000279618	17.7038	0.00989379	0.000405102	17.704	0.0162168	0.000937071	17.7038	0.0226403	0.00145379	17.7037	0.0293542	0.0038432	17.7028	0.0339243	0.0028652	17.704	0.0407174	0.00452849	17.7031	0.0471913	0.00481326	17.7035	0.0551465	0.00350965
17.8614	0.00333059	0.000250729	17.8612	0.00992266	0.000306303	17.8614	0.0163708	0.000994527	17.8612	0.0226489	0.00123207	17.8611	0.0291575	0.0034248	17.8601	0.0338116	0.00276629	17.8613	0.0407593	0.00480736	17.8605	0.0472542	0.00494427	17.8609	0.055025	0.0041026
18.0188	0.00334096	0.000156841	18.0186	0.00986826	0.000385175	18.0187	0.0163178	0.000845378	18.0186	0.0225054	0.000967654	18.0185	0.0291208	0.00293567	18.0175	0.0337251	0.00173466	18.0187	0.0407305	0.00480549	18.0178	0.0477161	0.00542021	18.0183	0.0551497	0.00318659
18.1761	0.00332188	0.000202353	18.1759	0.00983921	0.000275392	18.1761	0.016398	0.000824722	18.1759	0.0226224	0.00113506	18.1758	0.0289987	0.00308333	18.1748	0.03377	0.00177912	18.1761	0.0405459	0.00442301	18.1752	0.047641	0.00536574	18.1756	0.0552192	0.00251733
18.3335	0.00330305	0.000211958	18.3333	0.00985477	0.00019417	18.3335	0.0162449	0.00070559	18.3333	0.02273	0.00162879	18.3332	0.0291186	0.00278071	18.3322	0.0337797	0.00108086	18.3334	0.0406518	0.00451755	18.3326	0.0477328	0.00528936	18.333	0.0557033	0.00261397
18.4909	0.00330429	0.000195072	18.4907	0.00986927	0.000397384	18.4908	0.0163248	0.000893513	18.4907	0.0227625	0.00179737	18.4906	0.02914	0.00247085	18.4896	0.0338487	0.00144714	18.4908	0.0409039	0.00499511	18.4899	0.0475253	0.00529104	18.4904	0.0553592	0.00355084
18.6482	0.0033084	0.000185898	18.648	0.0098169	0.000429889	18.6482	0.016271	0.000949064	18.648	0.0227506	0.00190784	18.6479	0.0289328	0.0024121	18.6469	0.0334315	0.00113739	18.6482	0.0407712	0.00476982	18.6473	0.0473314	0.00592243	18.6477	0.0554397	0.00325483
18.8056	0.00331961	0.000196981	18.8054	0.00982604	0.000520391	18.8056	0.0163359	0.00109002	18.8054	0.0225661	0.00155996	18.8053	0.0289295	0.00301736	18.8043	0.0334667	0.00148121	18.8055	0.040857	0.00422171	18.8046	0.0474001	0.00498895	18.8051	0.0558087	0.00501748
18.963	0.00332219	0.000146455	18.9628	0.00983118	0.000426445	18.9629	0.0163045	0.000941687	18.9628	0.0225094	0.00134044	18.9627	0.0291173	0.00319564	18.9616	0.0335046	0.00195865	18.9629	0.0406673	0.00339408	18.962	0.0473974	0.00576157	18.9625	0.0554661	0.00406742
19.1203	0.0033292	0.000129839	19.1201	0.00986266	0.000382645	19.1203	0.0162363	0.00062903	19.1201	0.0225763	0.00123792	19.12	0.0291957	0.0030263	19.119	0.0336359	0.00180926	19.1203	0.0406371	0.00302193	19.1194	0.0476471	0.00499365	19.1198	0.0553072	0.00404367
19.2777	0.00333092	0.000101922	19.2775	0.0098347	0.000457769	19.2777	0.0163698	0.000870443	19.2775	0.0225894	0.0011195	19.2774	0.0290515	0.0033208	19.2764	0.0336934	0.00213309	19.2776	0.0405987	0.00331524	19.2767	0.0476312	0.00472751	19.2772	0.0553673	0.0037613
19.4351	0.00331125	4.40791e-05	19.4349	0.00986323	0.000527278	19.435	0.0162418	0.000751179	19.4349	0.0225498	0.00116599	19.4348	0.0291037	0.0031512	19.4337	0.0336493	0.00236855	19.435	0.0408015	0.003564	19.4341	0.0478284	0.0044587	19.4345	0.0551666	0.00336483
19.5924	0.00332765	0.000128174	19.5922	0.00984089	0.000567909	19.5924	0.0162655	0.000835046	19.5922	0.0225567	0.00116672	19.5921	0.0290873	0.00328289	19.5911	0.0338407	0.00269795	19.5924	0.0408337	0.00332064	19.5914	0.0474205	0.0053513	19.5919	0.0554392	0.00377313
19.7498	0.00332034	0.000101059	19.7496	0.00979889	0.000374799	19.7498	0.0162543	0.000935281	19.7496	0.0224648	0.00070076	19.7495	0.0290227	0.00229387	19.7484	0.0337794	0.00225186	19.7497	0.0408488	0.00306612	19.7488	0.0473241	0.00472498	19.7493	0.0552693	0.00377692
19.9072	0.00331339	0.000141124	19.907	0.00979833	0.000328675	19.9071	0.016331	0.000692777	19.907	0.0224808	0.000613947	19.9069	0.0290444	0.0027381	19.9058	0.0337612	0.00145195	19.9071	0.0409593	0.00295814	19.9062	0.0476213	0.00390008	19.9066	0.0551608	0.00459531

## Sheet: T=0.8Tc,W=1.58kTc
y-coordinate, averaged density profile ρf*(y), and uncertainty of the averaged density profile Δρf*(y) of the adsorption isotherm for:
T / Tc = 0.8,
ρs / σf-3 = 1.07, and
Ϛ = 0.514.
The averaged density profiles are indicated with the respective bulk fluid pressure pfb / esf-3.
pfb / esf-3 =	0.002709(33)		pfb / esf-3 =	0.00780(16)		pfb / esf-3 =	0.01237(31)		pfb / esf-3 =	0.01654(36)		pfb / esf-3 =	0.0200(5)		pfb / esf-3 =	0.0227(5)		pfb / esf-3 =	0.0257(12)		pfb / esf-3 =	0.0284(6)		pfb / esf-3 =	0.0309(11)
y / σf	ρf*(y) / σf-3	Δρf*(y) / σf-3	y / σf	ρf*(y) / σf-3	Δρf*(y) / σf-3	y / σf	ρf*(y) / σf-3	Δρf*(y) / σf-3	y / σf	ρf*(y) / σf-3	Δρf*(y) / σf-3	y / σf	ρf*(y) / σf-3	Δρf*(y) / σf-3	y / σf	ρf*(y) / σf-3	Δρf*(y) / σf-3	y / σf	ρf*(y) / σf-3	Δρf*(y) / σf-3	y / σf	ρf*(y) / σf-3	Δρf*(y) / σf-3	y / σf	ρf*(y) / σf-3	Δρf*(y) / σf-3
4.79975	8.24178e-08	2.04388e-07	4.7997	1.75412e-06	1.70883e-06	4.79975	2.48045e-06	6.2223e-06	4.7997	5.61907e-05	0.000101104	4.79968	0	0	4.79942	0	0	4.79974	0	0	4.79951	0	0	4.79962	0	0
4.95712	1.2225e-07	3.00536e-07	4.95707	1.97457e-06	1.68223e-06	4.95712	2.60615e-06	4.71406e-06	4.95707	7.36152e-05	0.000120114	4.95704	0	0	4.95678	0	0	4.95711	0	0	4.95687	0	0	4.95699	0	0
5.11449	1.53924e-07	3.48192e-07	5.11444	2.98122e-06	3.95476e-06	5.11448	2.88129e-06	4.99761e-06	5.11444	4.66087e-05	6.33541e-05	5.11441	0	0	5.11414	0	0	5.11448	0	0	5.11423	0	0	5.11435	0	0
5.27186	2.36258e-06	1.6625e-06	5.2718	1.17052e-05	5.47722e-06	5.27185	1.54093e-05	8.5734e-06	5.2718	5.44568e-05	2.45901e-05	5.27178	2.19891e-05	3.1272e-06	5.27149	2.30153e-05	5.76056e-06	5.27184	3.18342e-05	1.13362e-05	5.27159	3.68727e-05	8.19948e-06	5.27172	4.91239e-05	1.43214e-05
5.42923	0.00117702	5.07565e-05	5.42917	0.00365224	0.000230262	5.42922	0.00608302	0.000599629	5.42917	0.00896254	0.000107036	5.42914	0.0117031	0.00176616	5.42885	0.0135619	0.00116207	5.42921	0.0171678	0.00185768	5.42895	0.0203629	0.000753617	5.42908	0.0245992	0.00244942
5.5866	0.0112954	0.000603166	5.58654	0.0344309	0.00213616	5.58659	0.0572108	0.00512419	5.58654	0.0840171	0.00154714	5.58651	0.10939	0.0148083	5.58621	0.126518	0.0108984	5.58658	0.157641	0.0146647	5.58632	0.185987	0.00560187	5.58645	0.2207	0.0204961
5.74397	0.0194181	0.000736078	5.7439	0.0593682	0.0030666	5.74396	0.0980775	0.00878419	5.7439	0.142394	0.0023458	5.74388	0.184048	0.0236696	5.74357	0.213319	0.0160247	5.74395	0.263125	0.0232422	5.74368	0.308987	0.00652735	5.74381	0.361608	0.0311797
5.90134	0.012666	0.000260859	5.90127	0.0387811	0.00240376	5.90133	0.0644164	0.00544315	5.90127	0.0929639	0.00110868	5.90124	0.119916	0.0139596	5.90092	0.140004	0.009486	5.90132	0.172967	0.0137772	5.90104	0.202067	0.00487862	5.90118	0.236647	0.0223284
6.05871	0.00742417	0.000173166	6.05864	0.0230141	0.00149964	6.0587	0.0383818	0.00312753	6.05864	0.0557817	0.000912461	6.05861	0.0721278	0.00827514	6.05828	0.0846841	0.00592008	6.05869	0.105173	0.00851621	6.0584	0.124311	0.00431387	6.05854	0.146977	0.0121984
6.21608	0.00524158	0.000137573	6.21601	0.0162191	0.00115796	6.21607	0.0275266	0.00248404	6.21601	0.0400401	0.000841339	6.21598	0.0524448	0.00556418	6.21564	0.0622157	0.0045679	6.21606	0.0776415	0.00666515	6.21576	0.0932692	0.00391143	6.21591	0.112343	0.0116831
6.37344	0.00427595	0.000102914	6.37337	0.0133265	0.00104505	6.37343	0.0230153	0.0020862	6.37337	0.0337978	0.000989914	6.37334	0.0446446	0.00474161	6.373	0.0540986	0.00494673	6.37342	0.0686948	0.00758936	6.37312	0.0841185	0.0044521	6.37327	0.104137	0.0123337
6.53081	0.00382171	0.000143293	6.53074	0.0120273	0.00102193	6.5308	0.0211744	0.00187895	6.53074	0.0316874	0.00144118	6.53071	0.0428018	0.00507677	6.53036	0.0525518	0.00411521	6.53079	0.0686772	0.00740812	6.53048	0.086101	0.00443663	6.53064	0.110492	0.0152267
6.68818	0.00356357	0.000142236	6.68811	0.011356	0.00100166	6.68817	0.0201791	0.00188829	6.68811	0.0305799	0.0014953	6.68808	0.0422028	0.00560679	6.68771	0.0526669	0.00345728	6.68816	0.06952	0.00930944	6.68784	0.0891931	0.00619085	6.688	0.116842	0.0158314
6.84555	0.00339657	0.000108241	6.84548	0.0108403	0.000921296	6.84554	0.0191209	0.00158383	6.84548	0.0291266	0.00133793	6.84544	0.0398063	0.00426699	6.84507	0.0495504	0.00358784	6.84553	0.065077	0.00856733	6.8452	0.0835031	0.00598569	6.84537	0.109366	0.0159357
7.00292	0.00333601	8.61607e-05	7.00284	0.010325	0.000731319	7.00291	0.0180579	0.00154207	7.00284	0.0271412	0.00119413	7.00281	0.036377	0.00344106	7.00243	0.0449253	0.00365653	7.0029	0.0584252	0.00616289	7.00256	0.0743701	0.00482191	7.00273	0.095523	0.0148642
7.16029	0.00325368	9.37346e-05	7.16021	0.010081	0.000860588	7.16028	0.0172652	0.00158982	7.16021	0.0255305	0.00142536	7.16018	0.0335402	0.00295524	7.15979	0.0414155	0.00203027	7.16027	0.0529384	0.00562768	7.15993	0.0664862	0.0054324	7.1601	0.0847762	0.0128632
7.31766	0.00323523	0.000113308	7.31758	0.00986744	0.000696349	7.31765	0.0168808	0.00155607	7.31758	0.0245333	0.00180024	7.31754	0.0318749	0.00258823	7.31715	0.0389556	0.00174304	7.31764	0.0493292	0.00503269	7.31729	0.0615916	0.00503464	7.31746	0.0782076	0.0118024
7.47503	0.00323639	0.000120203	7.47494	0.00976267	0.000770259	7.47502	0.0165752	0.00123334	7.47494	0.0238348	0.00188455	7.47491	0.0308395	0.00173712	7.4745	0.0377121	0.00206263	7.475	0.0471506	0.00475823	7.47465	0.0584602	0.00571131	7.47483	0.0743638	0.0120731
7.6324	0.00321387	0.00011752	7.63231	0.00966617	0.00070453	7.63238	0.0162733	0.00118463	7.63231	0.0233498	0.0015037	7.63228	0.030093	0.00165869	7.63186	0.0364119	0.00190286	7.63237	0.0456379	0.00421347	7.63201	0.0563365	0.00572791	7.63219	0.071852	0.0116081
7.78977	0.00322076	0.000117268	7.78968	0.00960981	0.000679133	7.78975	0.0161093	0.00114594	7.78968	0.0230839	0.00145327	7.78964	0.0296806	0.00215769	7.78922	0.0355177	0.00192113	7.78974	0.0442329	0.00409562	7.78937	0.0544624	0.00539894	7.78956	0.0686691	0.010788
7.94713	0.00320733	9.78306e-05	7.94705	0.00962772	0.000513325	7.94712	0.0159889	0.0014799	7.94705	0.0228386	0.00131519	7.94701	0.0290947	0.00182195	7.94658	0.0349108	0.00141548	7.94711	0.0429944	0.00358899	7.94673	0.0523729	0.00470976	7.94692	0.0653248	0.0114214
8.1045	0.00320388	0.000139073	8.10441	0.00960532	0.000603135	8.10449	0.0158467	0.00126269	8.10441	0.0227362	0.00134931	8.10437	0.028551	0.00214645	8.10394	0.034294	0.00183494	8.10448	0.0420953	0.00345304	8.10409	0.0505599	0.00444552	8.10428	0.0622475	0.0104278
8.26187	0.00321879	5.87367e-05	8.26178	0.00957537	0.000543281	8.26186	0.0157867	0.000888972	8.26178	0.022647	0.00163994	8.26174	0.0284537	0.00158972	8.2613	0.0337915	0.00187338	8.26185	0.0410932	0.00309727	8.26145	0.0492297	0.00537245	8.26165	0.0597886	0.00867113
8.41924	0.0032117	7.46909e-05	8.41915	0.00950946	0.000617087	8.41923	0.0157401	0.000947198	8.41915	0.0223944	0.00152855	8.41911	0.0282855	0.00153028	8.41865	0.0334948	0.00223412	8.41921	0.0403195	0.00378014	8.41881	0.0484841	0.00566139	8.41901	0.0581769	0.00703318
8.57661	0.0031887	4.27989e-05	8.57652	0.00950428	0.000716291	8.5766	0.0157315	0.00107294	8.57652	0.0223745	0.00142236	8.57647	0.0283289	0.00144907	8.57601	0.0332528	0.00217073	8.57658	0.0398574	0.00379492	8.57617	0.0480212	0.00558651	8.57638	0.0565471	0.00691513
8.73398	0.00320508	6.05189e-05	8.73388	0.00955634	0.000741997	8.73397	0.0158101	0.000733055	8.73388	0.0223264	0.00173845	8.73384	0.0281383	0.00140548	8.73337	0.0331681	0.00205953	8.73395	0.0395512	0.00375755	8.73354	0.0472638	0.00572969	8.73374	0.0550295	0.00714177
8.89135	0.00320605	8.33842e-05	8.89125	0.0095065	0.000606735	8.89133	0.0158483	0.000932391	8.89125	0.0223228	0.00213218	8.89121	0.0281155	0.00157382	8.89073	0.0327976	0.00167222	8.89132	0.0391732	0.00369849	8.8909	0.0464347	0.00574201	8.89111	0.0538708	0.00762639
9.04872	0.00322004	5.65191e-05	9.04862	0.00953569	0.000591593	9.0487	0.0158242	0.00114641	9.04862	0.0223038	0.00176594	9.04857	0.0280693	0.00157955	9.04809	0.032636	0.00105701	9.04869	0.038651	0.00384302	9.04826	0.0462099	0.00561134	9.04847	0.0529737	0.00736797
9.20609	0.00322658	8.76146e-05	9.20598	0.00950788	0.000572241	9.20607	0.0158748	0.00118831	9.20598	0.0221594	0.00186528	9.20594	0.0279062	0.00187233	9.20544	0.0329029	0.00161715	9.20606	0.0385456	0.00363306	9.20562	0.045879	0.00638786	9.20584	0.0522039	0.0069735
9.36346	0.00320114	8.91356e-05	9.36335	0.0095035	0.000642651	9.36344	0.0158065	0.00123101	9.36335	0.02213	0.00188618	9.36331	0.02782	0.00154065	9.3628	0.0330051	0.00167492	9.36343	0.0385936	0.00319923	9.36298	0.0456376	0.006246	9.3632	0.0516037	0.00664577
9.52082	0.00320407	9.65798e-05	9.52072	0.00954938	0.000645315	9.52081	0.015808	0.00135244	9.52072	0.0222407	0.00138788	9.52067	0.0280763	0.00129465	9.52016	0.0330064	0.00247719	9.52079	0.0382192	0.0031157	9.52034	0.0455472	0.00577596	9.52057	0.0511367	0.00655557
9.67819	0.0032179	0.000119769	9.67809	0.009561	0.000726421	9.67818	0.0159291	0.0012545	9.67809	0.0223074	0.00150922	9.67804	0.0280311	0.00185293	9.67752	0.0331138	0.00277003	9.67816	0.0381358	0.00281001	9.6777	0.0450739	0.00611995	9.67793	0.0505322	0.00615416
9.83556	0.00319758	9.88125e-05	9.83545	0.00957363	0.000615671	9.83555	0.0158725	0.00110791	9.83545	0.0221905	0.00143727	9.83541	0.0281517	0.00148082	9.83488	0.0329846	0.00298262	9.83553	0.0380014	0.00300766	9.83506	0.0450956	0.00565888	9.8353	0.0500528	0.00623295
9.99293	0.00323391	0.000100384	9.99282	0.00956258	0.000515465	9.99292	0.0158049	0.00105174	9.99282	0.022243	0.00176527	9.99277	0.0280212	0.00166254	9.99223	0.0330137	0.00264383	9.9929	0.0381071	0.00294784	9.99242	0.0448508	0.0055582	9.99266	0.0499131	0.006712
10.1503	0.00324464	0.000143935	10.1502	0.00956051	0.000537551	10.1503	0.0157199	0.00130712	10.1502	0.022217	0.00184086	10.1501	0.0280946	0.00164223	10.1496	0.0327326	0.00243775	10.1503	0.038231	0.0025719	10.1498	0.0445935	0.00599066	10.15	0.0499202	0.00618664
10.3077	0.00320632	9.56523e-05	10.3076	0.00961657	0.000411555	10.3077	0.0156913	0.00126888	10.3076	0.0221254	0.00169561	10.3075	0.0278794	0.00162947	10.3069	0.0327724	0.00280957	10.3076	0.0383275	0.00320109	10.3071	0.0444989	0.00577829	10.3074	0.0497189	0.00623285
10.465	0.00321855	0.000105583	10.4649	0.00954286	0.000479005	10.465	0.0157786	0.00117908	10.4649	0.0221835	0.00167953	10.4649	0.0279083	0.00150187	10.4643	0.032862	0.00247897	10.465	0.0382836	0.0030607	10.4645	0.0445783	0.00552373	10.4648	0.049632	0.00586697
10.6224	0.00321418	5.94208e-05	10.6223	0.00954255	0.000573984	10.6224	0.0158322	0.00093857	10.6223	0.0223164	0.00166098	10.6222	0.0281232	0.00177716	10.6217	0.032937	0.00227096	10.6224	0.0383912	0.00311749	10.6219	0.0444639	0.00571985	10.6221	0.0494393	0.0057146
10.7798	0.00324493	9.84053e-05	10.7797	0.00952523	0.000466937	10.7798	0.0156299	0.000911605	10.7797	0.0222819	0.00171435	10.7796	0.0283176	0.00160053	10.779	0.0330264	0.00230367	10.7797	0.0387021	0.00324156	10.7792	0.0442175	0.00568212	10.7795	0.0493782	0.00567167
10.9371	0.00324613	0.000123184	10.937	0.00958234	0.00047109	10.9371	0.0156027	0.00108698	10.937	0.0222421	0.00179443	10.937	0.0281678	0.00191928	10.9364	0.0329213	0.00269064	10.9371	0.0385635	0.00264447	10.9366	0.0441069	0.00515714	10.9369	0.049138	0.00560281
11.0945	0.00322999	0.000162612	11.0944	0.0096046	0.000528844	11.0945	0.0157667	0.00102986	11.0944	0.0222468	0.00170986	11.0943	0.028008	0.00210731	11.0937	0.0329123	0.00259941	11.0945	0.0385351	0.0028554	11.094	0.0441036	0.00490667	11.0942	0.0488066	0.00582696
11.2519	0.00325059	0.000130779	11.2518	0.00959277	0.000591325	11.2519	0.0156887	0.000964852	11.2518	0.022206	0.00173454	11.2517	0.0280497	0.00192816	11.2511	0.032732	0.00260824	11.2518	0.0382623	0.00296775	11.2513	0.0440077	0.00397191	11.2516	0.0490399	0.00603788
11.4093	0.00324146	0.000109932	11.4091	0.00958171	0.000600237	11.4092	0.0157072	0.000899998	11.4091	0.0223112	0.00167685	11.4091	0.0279608	0.0018047	11.4085	0.0327372	0.00281928	11.4092	0.0379697	0.00331072	11.4087	0.0440384	0.00440277	11.4089	0.0491413	0.00493827
11.5666	0.00323065	0.000183979	11.5665	0.00962439	0.000599297	11.5666	0.0156937	0.00107949	11.5665	0.0222429	0.00148172	11.5664	0.0280302	0.00223123	11.5658	0.032806	0.00305556	11.5666	0.0382653	0.00350074	11.566	0.0441921	0.00464368	11.5663	0.0492798	0.00414184
11.724	0.00321806	0.000115298	11.7239	0.00959657	0.000568603	11.724	0.0156725	0.00102203	11.7239	0.0222727	0.00118315	11.7238	0.0279548	0.00206704	11.7232	0.0327482	0.00295049	11.724	0.0383248	0.00337249	11.7234	0.0441274	0.00501642	11.7237	0.0490795	0.00459718
11.8814	0.00321241	0.000168849	11.8812	0.00964676	0.000723023	11.8813	0.0156782	0.00119937	11.8812	0.0221195	0.00110162	11.8812	0.0281399	0.00240331	11.8805	0.0326766	0.0029526	11.8813	0.0382357	0.0032229	11.8808	0.0439	0.00481013	11.881	0.0488439	0.00422954
12.0387	0.00321272	0.000218295	12.0386	0.00962781	0.000695221	12.0387	0.0156876	0.000978609	12.0386	0.0221069	0.00114396	12.0385	0.0279443	0.00210601	12.0379	0.0329258	0.0024029	12.0387	0.038236	0.00317707	12.0381	0.0440045	0.0049234	12.0384	0.0492097	0.00361142
12.1961	0.00323776	0.000202393	12.196	0.00962261	0.000674734	12.1961	0.0156998	0.00112074	12.196	0.0221938	0.00135341	12.1959	0.0277542	0.00194875	12.1952	0.032821	0.00254474	12.1961	0.0382433	0.00327683	12.1955	0.0438848	0.00490567	12.1958	0.0491409	0.00392038
12.3535	0.00323535	0.000239767	12.3533	0.00963928	0.000572681	12.3534	0.0156613	0.00101346	12.3533	0.0222999	0.00160731	12.3533	0.0277966	0.0019493	12.3526	0.0328944	0.00246851	12.3534	0.0382181	0.00324038	12.3528	0.0438317	0.00520228	12.3531	0.0490077	0.00355259
12.5108	0.00322185	0.000213077	12.5107	0.00963471	0.000667385	12.5108	0.0156547	0.001252	12.5107	0.0223424	0.00122529	12.5106	0.0277612	0.00167961	12.51	0.0328508	0.00250453	12.5108	0.0382477	0.00280397	12.5102	0.0439083	0.00465677	12.5105	0.0490159	0.00303612
12.6682	0.00323697	0.000217597	12.6681	0.00961325	0.000573155	12.6682	0.01568	0.00120479	12.6681	0.0223484	0.00121546	12.668	0.0276743	0.00235073	12.6673	0.0327594	0.0021872	12.6682	0.0384012	0.00255654	12.6676	0.043767	0.00464892	12.6679	0.0490198	0.00275033
12.8256	0.0032147	0.000192079	12.8254	0.00961666	0.000636302	12.8256	0.0155832	0.00118695	12.8254	0.022349	0.00132575	12.8254	0.0278428	0.00171607	12.8247	0.0328107	0.00200491	12.8255	0.0383607	0.00324558	12.8249	0.0438622	0.00421615	12.8252	0.0489496	0.0034167
12.9829	0.00320152	0.000186797	12.9828	0.00956897	0.000542224	12.9829	0.0157944	0.00110986	12.9828	0.0222153	0.00158168	12.9827	0.0278292	0.00163106	12.982	0.0327856	0.00189472	12.9829	0.0385429	0.00319694	12.9823	0.0437592	0.003991	12.9826	0.0488912	0.00347231
13.1403	0.0032204	0.000180945	13.1402	0.00961741	0.000483906	13.1403	0.0158843	0.000886055	13.1402	0.0223475	0.0012644	13.1401	0.0277143	0.00196891	13.1394	0.0326631	0.00167699	13.1403	0.0387	0.003357	13.1396	0.0436754	0.00388594	13.14	0.0489656	0.00360081
13.2977	0.00322109	0.000131906	13.2975	0.00960381	0.000473267	13.2977	0.0158581	0.000952682	13.2975	0.0222665	0.00154675	13.2975	0.0277164	0.00211358	13.2968	0.0327001	0.00144867	13.2976	0.0384347	0.0030709	13.297	0.0436455	0.00434682	13.2973	0.0490277	0.00295243
13.455	0.00322185	0.000140512	13.4549	0.00962524	0.000653223	13.455	0.0159618	0.00114043	13.4549	0.022189	0.00155737	13.4548	0.0277137	0.00224321	13.4541	0.0326858	0.00164689	13.455	0.0385519	0.0031866	13.4544	0.0439125	0.00423025	13.4547	0.0491016	0.00308738
13.6124	0.00323038	0.000139615	13.6123	0.00962155	0.000576654	13.6124	0.0158653	0.00102006	13.6123	0.0222927	0.00153104	13.6122	0.027642	0.0020193	13.6115	0.0326794	0.00189732	13.6124	0.0385103	0.00315995	13.6117	0.0437211	0.00386006	13.6121	0.0492392	0.00292328
13.7698	0.00322895	0.000130532	13.7696	0.00956513	0.00032774	13.7698	0.0158207	0.000838415	13.7696	0.0224528	0.00143387	13.7696	0.0275821	0.00174395	13.7688	0.0325755	0.00220877	13.7697	0.0383536	0.00265514	13.7691	0.0438092	0.00403579	13.7694	0.0492256	0.00312345
13.9272	0.00323506	0.000238173	13.927	0.00956334	0.000349072	13.9271	0.0159065	0.00074769	13.927	0.0225202	0.00154587	13.9269	0.027709	0.00150176	13.9262	0.0322298	0.00272294	13.9271	0.0383863	0.00186116	13.9264	0.0439015	0.00446693	13.9268	0.0494953	0.00281581
14.0845	0.00322335	0.000268507	14.0844	0.00958448	0.000478582	14.0845	0.0159523	0.000613576	14.0844	0.0223042	0.00171851	14.0843	0.0275395	0.0019324	14.0835	0.03241	0.00285604	14.0845	0.0384283	0.00232301	14.0838	0.0444317	0.00333794	14.0841	0.049538	0.00373098
14.2419	0.00322021	0.000238535	14.2417	0.00956327	0.000333881	14.2419	0.0158105	0.000700629	14.2417	0.0221809	0.00150901	14.2417	0.0275149	0.00237158	14.2409	0.032502	0.0026029	14.2418	0.0381739	0.00254135	14.2412	0.0447052	0.00376778	14.2415	0.0495204	0.00360911
14.3993	0.00320655	0.000188606	14.3991	0.00959289	0.000279773	14.3992	0.0157673	0.000888412	14.3991	0.0221505	0.00192881	14.399	0.0276012	0.00265521	14.3983	0.0322956	0.00253021	14.3992	0.0382626	0.00255928	14.3985	0.0446188	0.00456672	14.3989	0.0492731	0.00333725
14.5566	0.00321564	0.000215064	14.5565	0.00950881	0.000309144	14.5566	0.0158511	0.000822755	14.5565	0.0221497	0.00164903	14.5564	0.0277859	0.00242111	14.5556	0.0322736	0.00249526	14.5566	0.038531	0.0023835	14.5559	0.0447251	0.0046707	14.5562	0.0493478	0.00320262
14.714	0.00320823	0.000170514	14.7138	0.00954724	0.00049215	14.714	0.0158966	0.000771142	14.7138	0.0219665	0.00149817	14.7138	0.0277125	0.00232549	14.713	0.0323821	0.00282428	14.714	0.0386688	0.00155413	14.7133	0.04455	0.00508373	14.7136	0.0495182	0.00324808
14.8714	0.00321687	0.000178088	14.8712	0.00957474	0.000512195	14.8713	0.0158774	0.000914648	14.8712	0.022026	0.00162771	14.8711	0.0277598	0.00196973	14.8703	0.0324783	0.00262251	14.8713	0.0385204	0.00162836	14.8706	0.0447252	0.00476253	14.871	0.0494039	0.00323505
15.0287	0.00320862	0.00017111	15.0286	0.00955426	0.000429107	15.0287	0.0158867	0.000901902	15.0286	0.0220725	0.00113073	15.0285	0.0279469	0.0019398	15.0277	0.032343	0.00196874	15.0287	0.0384814	0.00155408	15.028	0.0450231	0.00420401	15.0283	0.0492792	0.00404779
15.1861	0.00322117	0.000204459	15.1859	0.00961624	0.000453987	15.1861	0.0158868	0.000886413	15.1859	0.0221503	0.00114783	15.1859	0.0278863	0.00195633	15.185	0.0325915	0.00227181	15.1861	0.0385969	0.00140518	15.1853	0.0449797	0.00368196	15.1857	0.0492001	0.00342682
15.3435	0.00322071	0.000155629	15.3433	0.00963625	0.000363071	15.3435	0.0159358	0.00074432	15.3433	0.0222147	0.00100779	15.3432	0.0279301	0.002112	15.3424	0.0324925	0.00228361	15.3434	0.0384499	0.00175357	15.3427	0.0448563	0.0042059	15.3431	0.049048	0.00341398
15.5008	0.00321348	0.000179153	15.5007	0.00955426	0.000329143	15.5008	0.0158608	0.00101821	15.5007	0.0221454	0.000821971	15.5006	0.0278802	0.00198571	15.4998	0.0325555	0.00208674	15.5008	0.0385157	0.00189373	15.5001	0.0449922	0.00480791	15.5004	0.0491192	0.00347468
15.6582	0.00322307	0.00016299	15.658	0.0096012	0.000446866	15.6582	0.01589	0.000906841	15.658	0.022151	0.00112423	15.658	0.0278297	0.0018213	15.6571	0.0327479	0.00250732	15.6582	0.0387488	0.00219457	15.6574	0.0451915	0.00422226	15.6578	0.0490859	0.00324469
15.8156	0.00324892	0.000149275	15.8154	0.00957282	0.000381183	15.8156	0.0158593	0.000818582	15.8154	0.0221531	0.00116645	15.8153	0.0280741	0.00206271	15.8145	0.0327066	0.00213937	15.8155	0.0388224	0.00161008	15.8148	0.0450757	0.00388085	15.8152	0.0493191	0.00389441
15.973	0.00322841	0.000178511	15.9728	0.00956189	0.000396657	15.9729	0.0158903	0.000933603	15.9728	0.0220036	0.00143577	15.9727	0.0279145	0.00197277	15.9718	0.0327068	0.00201827	15.9729	0.039004	0.00141473	15.9721	0.0453258	0.00342725	15.9725	0.049404	0.00366011
16.1303	0.00323163	0.000162952	16.1301	0.00954186	0.000318983	16.1303	0.0158428	0.000821001	16.1301	0.0219743	0.00125681	16.1301	0.027989	0.00194583	16.1292	0.0328007	0.00186412	16.1303	0.0391862	0.00145663	16.1295	0.0451371	0.00376997	16.1299	0.049418	0.00323592
16.2877	0.00326338	0.00016892	16.2875	0.00960004	0.000216096	16.2877	0.0158832	0.000847114	16.2875	0.0219694	0.00101103	16.2874	0.0279247	0.00194443	16.2866	0.0327975	0.00174123	16.2876	0.0391041	0.00151477	16.2869	0.0449304	0.00368827	16.2873	0.0491738	0.0031411
16.4451	0.00324881	0.000141529	16.4449	0.0095739	0.00021803	16.445	0.0158615	0.000952886	16.4449	0.0221255	0.00117116	16.4448	0.027775	0.00164906	16.4439	0.032774	0.00160651	16.445	0.0389959	0.00155319	16.4442	0.0449445	0.00347687	16.4446	0.0493317	0.0030411
16.6024	0.00323823	0.000158471	16.6022	0.00954453	0.000220122	16.6024	0.015789	0.000509189	16.6022	0.0221367	0.00111868	16.6022	0.0277015	0.00211872	16.6013	0.0328435	0.0017598	16.6024	0.0391251	0.00158778	16.6016	0.045099	0.00324508	16.602	0.0493474	0.00236412
16.7598	0.00326384	0.000103651	16.7596	0.00953375	0.000414881	16.7598	0.0158676	0.000823098	16.7596	0.0221799	0.00139463	16.7595	0.027811	0.00230851	16.7586	0.0326796	0.00205346	16.7597	0.0389659	0.00089426	16.7589	0.045123	0.00238287	16.7593	0.0492851	0.00177679
16.9172	0.00327093	5.87801e-05	16.917	0.00954824	0.000468744	16.9171	0.0158649	0.000735346	16.917	0.0220329	0.00130152	16.9169	0.0279009	0.00191224	16.916	0.0327685	0.00159956	16.9171	0.0389968	0.00130348	16.9163	0.0449212	0.00288329	16.9167	0.0493963	0.0027553
17.0745	0.00325528	4.0935e-05	17.0743	0.00956504	0.00053633	17.0745	0.0158595	0.000828278	17.0743	0.0220498	0.0013861	17.0743	0.0278775	0.00184714	17.0733	0.0325916	0.00131662	17.0745	0.0389926	0.000954532	17.0737	0.0449377	0.00277878	17.0741	0.0494463	0.00288524
17.2319	0.00324168	4.57556e-05	17.2317	0.00962298	0.000493262	17.2319	0.0158384	0.000654464	17.2317	0.022002	0.00117551	17.2316	0.0279312	0.001945	17.2307	0.0325518	0.00123595	17.2319	0.0390161	0.0016269	17.231	0.0452013	0.00232514	17.2314	0.0496686	0.00253409
17.3893	0.00327691	7.24239e-05	17.3891	0.0096187	0.000475348	17.3892	0.0159426	0.000600606	17.3891	0.0221206	0.00134764	17.389	0.0278312	0.00270195	17.3881	0.0327256	0.00127361	17.3892	0.0390698	0.00123917	17.3884	0.0454434	0.00328759	17.3888	0.0496818	0.0030175
17.5466	0.00328173	9.59382e-05	17.5464	0.00959024	0.000384128	17.5466	0.0160167	0.000592861	17.5464	0.0221632	0.00150261	17.5464	0.0277407	0.0024834	17.5454	0.032794	0.00108975	17.5466	0.0391094	0.00139007	17.5458	0.0452839	0.00263148	17.5462	0.0494622	0.00350832
17.704	0.00324391	7.36058e-05	17.7038	0.00957842	0.000232427	17.704	0.016072	0.000709122	17.7038	0.0220233	0.0012971	17.7037	0.0278151	0.00201285	17.7028	0.0326358	0.000656615	17.704	0.038697	0.0012788	17.7031	0.0452117	0.00243665	17.7035	0.0499079	0.00380945
17.8614	0.00325996	7.10264e-05	17.8612	0.00957026	0.000417952	17.8614	0.0159972	0.000730384	17.8612	0.0220764	0.000725531	17.8611	0.027807	0.00202004	17.8601	0.0327877	0.0013321	17.8613	0.0390506	0.00132231	17.8605	0.0453218	0.00223924	17.8609	0.0497348	0.00383345
18.0188	0.00326565	8.85819e-05	18.0186	0.00951645	0.000326805	18.0187	0.0160581	0.000837363	18.0186	0.0221269	0.000832888	18.0185	0.0278544	0.00230564	18.0175	0.0327639	0.00170213	18.0187	0.0393736	0.00124498	18.0178	0.0454666	0.00347847	18.0183	0.0498053	0.00292138
18.1761	0.00327651	5.91834e-05	18.1759	0.00954092	0.00041161	18.1761	0.0160063	0.000902969	18.1759	0.0219979	0.00121473	18.1758	0.0277956	0.00244496	18.1748	0.032726	0.00188384	18.1761	0.0390961	0.00174768	18.1752	0.0452747	0.00335527	18.1756	0.0500064	0.00368039
18.3335	0.00324735	5.49494e-05	18.3333	0.00952886	0.000342219	18.3335	0.0159802	0.00108533	18.3333	0.0220294	0.00126258	18.3332	0.0278356	0.00239792	18.3322	0.0326855	0.00153258	18.3334	0.0392108	0.00137711	18.3326	0.0454051	0.00305728	18.333	0.0500468	0.00404209
18.4909	0.00325666	0.000101297	18.4907	0.00959287	0.000461861	18.4908	0.0159699	0.00100688	18.4907	0.0220868	0.00141372	18.4906	0.0278193	0.00228195	18.4896	0.0328305	0.00139083	18.4908	0.0390815	0.00132744	18.4899	0.0454672	0.00305434	18.4904	0.050049	0.00438388
18.6482	0.00325635	0.000121065	18.648	0.00963477	0.000541752	18.6482	0.01598	0.00107148	18.648	0.0220341	0.00114996	18.6479	0.0279321	0.00247986	18.6469	0.0326293	0.00140248	18.6482	0.0390256	0.00176075	18.6473	0.0450796	0.00314617	18.6477	0.0500554	0.00425446
18.8056	0.00327915	5.65112e-05	18.8054	0.00963885	0.000489436	18.8056	0.0159462	0.00106136	18.8054	0.0220546	0.000887828	18.8053	0.0279434	0.00208648	18.8043	0.0326879	0.00140017	18.8055	0.0388808	0.00209504	18.8046	0.0452143	0.00269213	18.8051	0.0504283	0.00432169
18.963	0.00325994	0.00012116	18.9628	0.00957612	0.000481084	18.9629	0.0159493	0.00118191	18.9628	0.021909	0.00081549	18.9627	0.0280096	0.00212424	18.9616	0.0325913	0.00208256	18.9629	0.0387099	0.00194902	18.962	0.0453222	0.00338574	18.9625	0.050258	0.00426832
19.1203	0.00324743	0.000115816	19.1201	0.00958603	0.000554659	19.1203	0.0159657	0.000741125	19.1201	0.0219236	0.000556541	19.12	0.0279716	0.00167627	19.119	0.0326689	0.00206762	19.1203	0.0387496	0.00191176	19.1194	0.0453016	0.00275848	19.1198	0.0503996	0.00432194
19.2777	0.00329218	0.000118793	19.2775	0.00963563	0.000602266	19.2777	0.0159204	0.000466141	19.2775	0.021952	0.000653655	19.2774	0.0279423	0.00149102	19.2764	0.0325952	0.00165431	19.2776	0.0386309	0.00151916	19.2767	0.045164	0.00279871	19.2772	0.0506134	0.00485596
19.4351	0.00328169	0.000206023	19.4349	0.00963608	0.000552701	19.435	0.0159203	0.000515067	19.4349	0.0220422	0.000960746	19.4348	0.0277441	0.00141052	19.4337	0.0325786	0.0022093	19.435	0.0386288	0.0012022	19.4341	0.0453569	0.002835	19.4345	0.0508073	0.005103
19.5924	0.00326272	0.000160935	19.5922	0.00962942	0.000284596	19.5924	0.0159913	0.000814756	19.5922	0.0220757	0.0011285	19.5921	0.0277159	0.00115288	19.5911	0.032429	0.00243274	19.5924	0.038797	0.00117484	19.5914	0.0454171	0.0032838	19.5919	0.0507306	0.00506699
19.7498	0.00327319	0.000134458	19.7496	0.00964732	0.000278529	19.7498	0.0159363	0.000791797	19.7496	0.0221764	0.00110142	19.7495	0.0277674	0.00149466	19.7484	0.0326025	0.00266153	19.7497	0.0386528	0.00133835	19.7488	0.0455166	0.00360967	19.7493	0.050648	0.00552261
19.9072	0.00327041	0.000102809	19.907	0.00967783	0.000415469	19.9071	0.0158732	0.000887291	19.907	0.0221302	0.00100141	19.9069	0.0279256	0.00140241	19.9058	0.032706	0.00218488	19.9071	0.0387527	0.00144779	19.9062	0.0454174	0.00306444	19.9066	0.0504028	0.00527545

## Sheet: T=0.8Tc,W=2.00kTc
y-coordinate, averaged density profile ρf*(y), and uncertainty of the averaged density profile Δρf*(y) of the adsorption isotherm for:
T / Tc = 0.8,
ρs / σf-3 = 1.07, and
Ϛ = 0.65.
The averaged density profiles are indicated with the respective bulk fluid pressure pfb / esf-3.
pfb / esf-3 =	0.002632(47)		pfb / esf-3 =	0.00754(12)		pfb / esf-3 =	0.01187(42)		pfb / esf-3 =	0.01587(42)		pfb / esf-3 =	0.0191(6)		pfb / esf-3 =	0.0213(8)		pfb / esf-3 =	0.0242(9)		pfb / esf-3 =	0.0261(7)
y / σf	ρf*(y) / σf-3	Δρf*(y) / σf-3	y / σf	ρf*(y) / σf-3	Δρf*(y) / σf-3	y / σf	ρf*(y) / σf-3	Δρf*(y) / σf-3	y / σf	ρf*(y) / σf-3	Δρf*(y) / σf-3	y / σf	ρf*(y) / σf-3	Δρf*(y) / σf-3	y / σf	ρf*(y) / σf-3	Δρf*(y) / σf-3	y / σf	ρf*(y) / σf-3	Δρf*(y) / σf-3	y / σf	ρf*(y) / σf-3	Δρf*(y) / σf-3
4.79975	0	0	4.7997	2.74611e-05	8.6019e-05	4.79975	7.44589e-05	7.78341e-05	4.7997	0.000514625	0.000405631	4.79968	0	0	4.79942	0	0	4.79974	0	0	4.79951	0	0
4.95712	4.85186e-08	2.91112e-07	4.95707	1.20605e-05	2.34099e-05	4.95712	9.87722e-05	5.54492e-05	4.95707	0.000487181	0.000200317	4.95704	0	0	4.95678	0	0	4.95711	0	0	4.95687	0	0
5.11449	3.4429e-08	2.06574e-07	5.11444	1.13691e-05	1.47636e-05	5.11448	6.72697e-05	3.10337e-05	5.11444	0.000249165	5.81418e-05	5.11441	0	0	5.11414	0	0	5.11448	0	0	5.11423	0	0
5.27186	1.28331e-06	1.50309e-07	5.2718	1.76807e-05	1.13491e-05	5.27185	5.19373e-05	2.54327e-05	5.2718	0.000150346	3.69322e-05	5.27178	1.67487e-05	4.71259e-06	5.27149	2.03371e-05	1.09839e-06	5.27184	2.7872e-05	6.71771e-06	5.27159	4.36835e-05	5.89952e-06
5.42923	0.00189125	5.44906e-05	5.42917	0.0060991	0.00068965	5.42922	0.0106441	0.000880827	5.42917	0.0161504	0.00108936	5.42914	0.0225098	0.00182616	5.42885	0.0299094	0.00385721	5.42921	0.0375099	0.00480249	5.42895	0.0532889	0.00640975
5.5866	0.0195161	0.000558333	5.58654	0.0619158	0.00614907	5.58659	0.107324	0.00914975	5.58654	0.159689	0.0103163	5.58651	0.220012	0.0160731	5.58621	0.289118	0.0350597	5.58658	0.35277	0.0418218	5.58632	0.4848	0.0506346
5.74397	0.0314673	0.000757077	5.7439	0.0994517	0.00967306	5.74396	0.169833	0.0125661	5.7439	0.247816	0.0132847	5.74388	0.337539	0.0217399	5.74357	0.433893	0.0449034	5.74395	0.51916	0.0548338	5.74368	0.69023	0.0523846
5.90134	0.0180652	0.000133175	5.90127	0.0570157	0.00534542	5.90133	0.0970926	0.00647683	5.90127	0.140525	0.0067708	5.90124	0.191185	0.00999289	5.90092	0.243268	0.0225502	5.90132	0.290956	0.0270903	5.90104	0.382691	0.0242121
6.05871	0.0092889	0.000130641	6.05864	0.0293858	0.00268481	6.0587	0.0505183	0.00269654	6.05864	0.0734381	0.00407049	6.05861	0.10126	0.00557755	6.05828	0.128834	0.0124372	6.05869	0.157113	0.0124789	6.0584	0.209026	0.0123707
6.21608	0.00598433	0.000128388	6.21601	0.0190626	0.00184817	6.21607	0.0333585	0.00189257	6.21601	0.0490495	0.00305168	6.21598	0.0688127	0.00378594	6.21564	0.0890919	0.00920688	6.21606	0.111404	0.0100816	6.21576	0.15454	0.00982844
6.37344	0.00460502	8.0333e-05	6.37337	0.0148487	0.00138253	6.37343	0.0266473	0.0021598	6.37337	0.0404401	0.0030002	6.37334	0.0583897	0.00383328	6.373	0.0783237	0.0102164	6.37342	0.102479	0.0112209	6.37312	0.152467	0.0181426
6.53081	0.00397704	5.67184e-05	6.53074	0.0131281	0.00138539	6.5308	0.0242756	0.00185643	6.53074	0.0383359	0.00307256	6.53071	0.0577798	0.00418116	6.53036	0.0818709	0.0123012	6.53079	0.112666	0.0161158	6.53048	0.185793	0.029747
6.68818	0.00364019	0.000122014	6.68811	0.0121588	0.00123431	6.68817	0.0230876	0.0017692	6.68811	0.0374078	0.0030979	6.68808	0.0573854	0.0044218	6.68771	0.0835798	0.0132458	6.68816	0.118418	0.0185464	6.68784	0.202544	0.0347312
6.84555	0.00346486	0.000146055	6.84548	0.011393	0.00111898	6.84554	0.0211594	0.001425	6.84548	0.0339051	0.00264863	6.84544	0.0514418	0.00389601	6.84507	0.0729309	0.0111932	6.84553	0.102617	0.0135985	6.8452	0.17181	0.0269509
7.00292	0.00331418	0.000176897	7.00284	0.0105982	0.000805244	7.00291	0.0192133	0.00118909	7.00284	0.0297278	0.00273179	7.00281	0.0436496	0.00301813	7.00243	0.0598502	0.00789414	7.0029	0.0822474	0.010225	7.00256	0.133798	0.0184137
7.16029	0.00322877	0.000159149	7.16021	0.0101055	0.000850538	7.16028	0.0179433	0.00143926	7.16021	0.0267127	0.00259041	7.16018	0.0380993	0.00290365	7.15979	0.0506948	0.00556316	7.16027	0.0681898	0.00725525	7.15993	0.108834	0.0143342
7.31766	0.00318559	0.00018395	7.31758	0.00974895	0.000776659	7.31765	0.0169456	0.00131815	7.31758	0.0249291	0.00266932	7.31754	0.0349386	0.00299332	7.31715	0.0454516	0.00431484	7.31764	0.0602656	0.0068225	7.31729	0.0964762	0.0136126
7.47503	0.00316703	0.000163021	7.47494	0.00955991	0.000588794	7.47502	0.016272	0.0012914	7.47494	0.0237064	0.00217905	7.47491	0.0327873	0.00214212	7.4745	0.0422013	0.00444047	7.475	0.0555306	0.00553077	7.47465	0.090681	0.0145361
7.6324	0.00316189	0.000140871	7.63231	0.00945214	0.000379948	7.63238	0.0159258	0.00143418	7.63231	0.0230896	0.00249384	7.63228	0.0313546	0.00122946	7.63186	0.0398654	0.00408628	7.63237	0.0526552	0.00415407	7.63201	0.0853696	0.0132996
7.78977	0.00315222	0.000154806	7.78968	0.00935229	0.000632098	7.78975	0.0157012	0.00115147	7.78968	0.0224014	0.00275774	7.78964	0.0301402	0.00125468	7.78922	0.0377035	0.00415193	7.78974	0.0493937	0.003463	7.78937	0.0775334	0.012366
7.94713	0.00314249	0.000208066	7.94705	0.00929261	0.00065869	7.94712	0.0155507	0.000941478	7.94705	0.0219667	0.00241066	7.94701	0.0290707	0.0016095	7.94658	0.0357295	0.00290909	7.94711	0.0459926	0.0026455	7.94673	0.0695441	0.00850403
8.1045	0.0031403	0.000207514	8.10441	0.00924285	0.000687559	8.10449	0.0154964	0.00107473	8.10441	0.021584	0.0021914	8.10437	0.0284257	0.00151276	8.10394	0.0342443	0.00266567	8.10448	0.0430706	0.00187838	8.10409	0.0630324	0.00647363
8.26187	0.0031368	0.000177064	8.26178	0.00920927	0.000632812	8.26186	0.015416	0.000957904	8.26178	0.0212525	0.00218446	8.26174	0.0277343	0.00171773	8.2613	0.0329937	0.00313571	8.26185	0.0410662	0.00166342	8.26145	0.057788	0.00531097
8.41924	0.00314627	0.000205124	8.41915	0.00913968	0.000646489	8.41923	0.01539	0.00110137	8.41915	0.0212063	0.00229624	8.41911	0.0274981	0.00248001	8.41865	0.0324168	0.00267031	8.41921	0.0395391	0.00118739	8.41881	0.0542836	0.00418047
8.57661	0.00314456	0.000253728	8.57652	0.00919678	0.000683597	8.5766	0.0153363	0.00102793	8.57652	0.0212334	0.00251288	8.57647	0.0271578	0.00177706	8.57601	0.03167	0.00217739	8.57658	0.0387212	0.000609098	8.57617	0.0517321	0.00298011
8.73398	0.00315653	0.000290394	8.73388	0.0091776	0.000636938	8.73397	0.015242	0.000872624	8.73388	0.0211467	0.00224711	8.73384	0.0270169	0.00179644	8.73337	0.0310743	0.00206058	8.73395	0.0379354	0.0012554	8.73354	0.0489368	0.0030871
8.89135	0.00315353	0.000263561	8.89125	0.00927839	0.000582209	8.89133	0.0152937	0.00117827	8.89125	0.0211302	0.00200884	8.89121	0.0267401	0.00142883	8.89073	0.0307268	0.00191977	8.89132	0.03732	0.00166696	8.8909	0.0471613	0.00239305
9.04872	0.00313507	0.000174402	9.04862	0.00921529	0.000466484	9.0487	0.01527	0.000916627	9.04862	0.0210408	0.00212699	9.04857	0.0266435	0.00124747	9.04809	0.0303371	0.00184555	9.04869	0.0367482	0.00138098	9.04826	0.0454778	0.00181393
9.20609	0.00313594	0.000117961	9.20598	0.00927888	0.000622483	9.20607	0.0152819	0.00110167	9.20598	0.0209498	0.00192082	9.20594	0.0264457	0.00160213	9.20544	0.0302831	0.00112901	9.20606	0.0360751	0.00145862	9.20562	0.0437781	0.00167809
9.36346	0.00313552	0.000136975	9.36335	0.00923527	0.000660203	9.36344	0.0152213	0.00121769	9.36335	0.0208833	0.00197704	9.36331	0.0264719	0.00173976	9.3628	0.0300475	0.00100216	9.36343	0.0359293	0.00076698	9.36298	0.0430916	0.00162714
9.52082	0.00315007	0.000154443	9.52072	0.00921662	0.000653862	9.52081	0.0152768	0.00137141	9.52072	0.0207823	0.00189687	9.52067	0.0263861	0.00199467	9.52016	0.0300991	0.000721746	9.52079	0.035732	0.00100885	9.52034	0.0420601	0.00239978
9.67819	0.00317713	0.000181689	9.67809	0.00924886	0.000686282	9.67818	0.0152632	0.000924619	9.67809	0.0209205	0.00217299	9.67804	0.0264525	0.00228913	9.67752	0.0300927	0.000739714	9.67816	0.035385	0.00152214	9.6777	0.0413369	0.00182183
9.83556	0.00318351	0.00011352	9.83545	0.00929485	0.000789528	9.83555	0.0151877	0.000993155	9.83545	0.0208438	0.00236288	9.83541	0.0264553	0.00242717	9.83488	0.0302706	0.00109113	9.83553	0.0352643	0.00160143	9.83506	0.0407636	0.00169521
9.99293	0.00315896	0.000154143	9.99282	0.00923937	0.000661705	9.99292	0.0152373	0.00135025	9.99282	0.020806	0.00253141	9.99277	0.0263292	0.0019772	9.99223	0.0300833	0.000945512	9.9929	0.0350012	0.00144317	9.99242	0.0402357	0.00193245
10.1503	0.00314534	0.000202788	10.1502	0.00926681	0.000803968	10.1503	0.0152532	0.00154466	10.1502	0.0207901	0.00222665	10.1501	0.0261149	0.00155552	10.1496	0.0297914	0.00097014	10.1503	0.0350981	0.000920283	10.1498	0.0399725	0.00175632
10.3077	0.00315208	0.000201376	10.3076	0.00926091	0.00064515	10.3077	0.0153142	0.00140818	10.3076	0.0208627	0.00262281	10.3075	0.0262159	0.0021374	10.3069	0.029758	0.000845248	10.3076	0.0349099	0.000672928	10.3071	0.0396254	0.00113624
10.465	0.00316697	0.000216929	10.4649	0.00930051	0.000719543	10.465	0.0152297	0.00168912	10.4649	0.0209335	0.00260523	10.4649	0.0262508	0.00209916	10.4643	0.0296721	0.000674974	10.465	0.0348916	0.000693953	10.4645	0.0394394	0.00102844
10.6224	0.00317586	0.000296604	10.6223	0.00928072	0.000752507	10.6224	0.0152928	0.00173856	10.6223	0.0209365	0.00277074	10.6222	0.0262481	0.00186112	10.6217	0.0298083	0.000375038	10.6224	0.0348285	0.00114485	10.6219	0.0394679	0.00156427
10.7798	0.00315956	0.000218011	10.7797	0.00924391	0.000794744	10.7798	0.0152623	0.00154335	10.7797	0.0208129	0.00239208	10.7796	0.0265185	0.00214777	10.779	0.0296443	0.000656461	10.7797	0.0346831	0.00120366	10.7792	0.0391909	0.00139513
10.9371	0.00315465	0.000187687	10.937	0.00926598	0.000844477	10.9371	0.0152183	0.00168678	10.937	0.0209253	0.00259168	10.937	0.0265918	0.00208715	10.9364	0.0297864	0.000488552	10.9371	0.03467	0.0011042	10.9366	0.0389468	0.00182292
11.0945	0.00316244	0.000155386	11.0944	0.00929781	0.000826629	11.0945	0.0151738	0.00142996	11.0944	0.0210195	0.00274518	11.0943	0.0262729	0.0019287	11.0937	0.0298131	0.000253565	11.0945	0.0349641	0.000615461	11.094	0.0389498	0.0017126
11.2519	0.00317003	0.000136793	11.2518	0.00925838	0.000838293	11.2519	0.0151628	0.00126906	11.2518	0.0209477	0.00273137	11.2517	0.0261925	0.00143539	11.2511	0.0295622	0.000568405	11.2518	0.0347569	0.000635753	11.2513	0.0385384	0.00200474
11.4093	0.00317732	0.000178754	11.4091	0.00922704	0.000819258	11.4092	0.0151779	0.0012744	11.4091	0.020821	0.00194332	11.4091	0.026211	0.00182857	11.4085	0.0296935	0.000519261	11.4092	0.034751	0.000680448	11.4087	0.0386159	0.00206023
11.5666	0.00315969	0.000205227	11.5665	0.00922119	0.00079199	11.5666	0.0151604	0.00113872	11.5665	0.0208147	0.00226678	11.5664	0.0261878	0.00139673	11.5658	0.0296211	0.000662745	11.5666	0.0346383	0.0010013	11.566	0.0386343	0.00231701
11.724	0.00316328	0.000202778	11.7239	0.0092224	0.000828879	11.724	0.0150472	0.000850384	11.7239	0.0208128	0.00197844	11.7238	0.0262268	0.00148216	11.7232	0.029809	0.000672262	11.724	0.0346343	0.000264815	11.7234	0.0383771	0.00185987
11.8814	0.00316421	0.000174207	11.8812	0.00924003	0.000829999	11.8813	0.0151431	0.00108258	11.8812	0.0208433	0.00218684	11.8812	0.0263215	0.00194487	11.8805	0.0298914	0.00105365	11.8813	0.034512	0.000389723	11.8808	0.0385895	0.00239294
12.0387	0.00316802	0.000171586	12.0386	0.00922511	0.000606429	12.0387	0.0150303	0.00110432	12.0386	0.0207907	0.00215944	12.0385	0.0262264	0.00108144	12.0379	0.0298479	0.000965089	12.0387	0.0346784	0.000546984	12.0381	0.0386325	0.002637
12.1961	0.00314252	0.000145159	12.196	0.00921588	0.000580677	12.1961	0.0150804	0.00108755	12.196	0.0207376	0.00200971	12.1959	0.0262283	0.00150541	12.1952	0.0295112	0.000573577	12.1961	0.0346312	0.000758331	12.1955	0.0389349	0.00317293
12.3535	0.00314868	0.00016237	12.3533	0.00921353	0.000502024	12.3534	0.015101	0.0013314	12.3533	0.0207292	0.00215232	12.3533	0.0262642	0.00197071	12.3526	0.0297477	0.000825509	12.3534	0.0344956	0.000923167	12.3528	0.0385969	0.00327748
12.5108	0.00315441	0.000194943	12.5107	0.00920711	0.000652189	12.5108	0.0150749	0.00110442	12.5107	0.0207502	0.00214889	12.5106	0.0264965	0.00211784	12.51	0.0298308	0.0012132	12.5108	0.034605	0.00107869	12.5102	0.0387086	0.00296496
12.6682	0.00315582	0.000216	12.6681	0.00921419	0.000569828	12.6682	0.0151329	0.00131804	12.6681	0.0207947	0.00239812	12.668	0.0264213	0.00217483	12.6673	0.0298749	0.00107543	12.6682	0.0349481	0.0005549	12.6676	0.0386251	0.00209753
12.8256	0.00316584	0.000229253	12.8254	0.00922916	0.000524133	12.8256	0.0151784	0.00120007	12.8254	0.0208773	0.00256259	12.8254	0.0264755	0.00204842	12.8247	0.0297424	0.00082077	12.8255	0.03477	0.000881566	12.8249	0.0386682	0.00187667
12.9829	0.00317199	0.000170193	12.9828	0.00919896	0.000494013	12.9829	0.0152194	0.00146963	12.9828	0.0208206	0.00246016	12.9827	0.0264783	0.00204694	12.982	0.0297724	0.00100358	12.9829	0.0349519	0.00156791	12.9823	0.0388328	0.00192937
13.1403	0.00318056	0.000185294	13.1402	0.00923555	0.000528739	13.1403	0.0152287	0.00129803	13.1402	0.0208982	0.00253241	13.1401	0.0266714	0.00216589	13.1394	0.0296715	0.000696861	13.1403	0.0349298	0.00160333	13.1396	0.0388396	0.00295353
13.2977	0.00318046	0.000169445	13.2975	0.0092314	0.000409584	13.2977	0.0152544	0.00154245	13.2975	0.0209693	0.00253135	13.2975	0.0266342	0.00220411	13.2968	0.0296514	0.000834866	13.2976	0.0352276	0.00156336	13.297	0.0390188	0.00372637
13.455	0.00316901	0.000182919	13.4549	0.00922849	0.000412764	13.455	0.0153065	0.001759	13.4549	0.0210774	0.00213452	13.4548	0.026571	0.00197007	13.4541	0.0296584	0.00117044	13.455	0.0354572	0.00126564	13.4544	0.0389873	0.00404192
13.6124	0.00316497	0.000141214	13.6123	0.00924962	0.000485669	13.6124	0.0152827	0.00175327	13.6123	0.0210642	0.00215708	13.6122	0.026741	0.00158492	13.6115	0.0296178	0.00105039	13.6124	0.0350769	0.001477	13.6117	0.0386924	0.00321694
13.7698	0.00316338	0.000166349	13.7696	0.00927452	0.000523496	13.7698	0.0152083	0.00172601	13.7696	0.0211089	0.00262778	13.7696	0.0269045	0.00178393	13.7688	0.02967	0.00131422	13.7697	0.034948	0.00179147	13.7691	0.0389229	0.0030842
13.9272	0.00317172	0.000248405	13.927	0.00924383	0.000375972	13.9271	0.0152343	0.00188368	13.927	0.0209539	0.00228829	13.9269	0.0269103	0.00199701	13.9262	0.0297059	0.00168557	13.9271	0.0350514	0.00159468	13.9264	0.0388255	0.0033534
14.0845	0.00316795	0.000226681	14.0844	0.00924541	0.000382894	14.0845	0.0152759	0.00197742	14.0844	0.0209198	0.00227915	14.0843	0.0268522	0.00230723	14.0835	0.0298354	0.00165623	14.0845	0.0350051	0.000940024	14.0838	0.0388158	0.00360507
14.2419	0.00316559	0.000245875	14.2417	0.00926088	0.000466057	14.2419	0.0153116	0.00197951	14.2417	0.020978	0.00235483	14.2417	0.0267636	0.00228506	14.2409	0.0297596	0.0019565	14.2418	0.0352259	0.0012221	14.2412	0.0388406	0.00365623
14.3993	0.00314908	0.000257485	14.3991	0.00923005	0.00042453	14.3992	0.0153176	0.00179103	14.3991	0.0209469	0.00216022	14.399	0.0268216	0.00251146	14.3983	0.0297889	0.00168066	14.3992	0.0353709	0.00101944	14.3985	0.0388236	0.00361913
14.5566	0.00313945	0.000234832	14.5565	0.00921282	0.000485995	14.5566	0.0152537	0.00155272	14.5565	0.0209869	0.00235116	14.5564	0.0266405	0.00225036	14.5556	0.0297038	0.0021801	14.5566	0.0352826	0.00114107	14.5559	0.0389008	0.00344984
14.714	0.0031397	0.000130725	14.7138	0.00920309	0.00049708	14.714	0.015203	0.00146156	14.7138	0.0211166	0.00273263	14.7138	0.0267018	0.0025405	14.713	0.0298696	0.00227129	14.714	0.0354317	0.00174115	14.7133	0.0389915	0.00351142
14.8714	0.00315931	0.000157299	14.8712	0.00922043	0.000482195	14.8713	0.0152084	0.00156854	14.8712	0.0210255	0.00221435	14.8711	0.0267066	0.00242479	14.8703	0.0298817	0.00249448	14.8713	0.0353803	0.0010906	14.8706	0.0390874	0.00405975
15.0287	0.00315488	0.000206828	15.0286	0.00919221	0.000567559	15.0287	0.0151663	0.00151691	15.0286	0.0209575	0.00197455	15.0285	0.0266267	0.00179722	15.0277	0.0299188	0.00247214	15.0287	0.0352403	0.00150971	15.028	0.0389781	0.00356032
15.1861	0.00315875	0.0002523	15.1859	0.00920967	0.000730561	15.1861	0.0152095	0.00142412	15.1859	0.0209507	0.00234764	15.1859	0.0267527	0.00180867	15.185	0.0299804	0.00211092	15.1861	0.0350942	0.000377635	15.1853	0.0389933	0.00423228
15.3435	0.00315453	0.000217588	15.3433	0.00915576	0.000489774	15.3435	0.0152739	0.00121988	15.3433	0.0210437	0.00229747	15.3432	0.0270036	0.00190833	15.3424	0.030093	0.00219785	15.3434	0.0354747	0.000846914	15.3427	0.0387845	0.00376427
15.5008	0.00316397	0.000188849	15.5007	0.00919925	0.00068538	15.5008	0.0152439	0.00122116	15.5007	0.0210361	0.0018204	15.5006	0.0268387	0.00263927	15.4998	0.0300412	0.00196192	15.5008	0.0353024	0.00167956	15.5001	0.0388762	0.00381891
15.6582	0.00314718	0.000220392	15.658	0.00923497	0.000620493	15.6582	0.0151964	0.00106572	15.658	0.0209918	0.00171853	15.658	0.0267185	0.00231106	15.6571	0.030037	0.00188904	15.6582	0.0352112	0.00124583	15.6574	0.0391394	0.00271331
15.8156	0.00315928	0.000217672	15.8154	0.00921658	0.000675522	15.8156	0.0152278	0.0013311	15.8154	0.0211233	0.00180866	15.8153	0.0265939	0.00252522	15.8145	0.0300898	0.00259578	15.8155	0.0352789	0.00186154	15.8148	0.0392247	0.00331699
15.973	0.00313082	0.000293746	15.9728	0.00925826	0.00068033	15.9729	0.0152948	0.00134965	15.9728	0.0211244	0.00185915	15.9727	0.0266906	0.00249973	15.9718	0.0300492	0.00228365	15.9729	0.035344	0.00195892	15.9721	0.0394239	0.00372764
16.1303	0.00316858	0.000306331	16.1301	0.00928245	0.000635812	16.1303	0.0152672	0.00129513	16.1301	0.0211142	0.00218944	16.1301	0.0266169	0.00216407	16.1292	0.0301213	0.00261282	16.1303	0.0357034	0.00305821	16.1295	0.0394006	0.00448577
16.2877	0.00316921	0.000276301	16.2875	0.00923843	0.00068518	16.2877	0.0152732	0.00147139	16.2875	0.0211813	0.00235259	16.2874	0.0266721	0.00236384	16.2866	0.0300849	0.00258569	16.2876	0.0358249	0.00301352	16.2869	0.0393098	0.00507948
16.4451	0.00315999	0.000189703	16.4449	0.00925253	0.000605029	16.445	0.0153487	0.00149949	16.4449	0.0210479	0.00235443	16.4448	0.026883	0.00243402	16.4439	0.0302222	0.00181145	16.445	0.0358916	0.0034092	16.4442	0.0392126	0.00390457
16.6024	0.0031815	0.000254459	16.6022	0.00929095	0.00058637	16.6024	0.015367	0.00137969	16.6022	0.021067	0.00201802	16.6022	0.0269173	0.00227751	16.6013	0.0304353	0.0020977	16.6024	0.0357851	0.0025174	16.6016	0.0391938	0.00358077
16.7598	0.00317732	0.000288484	16.7596	0.00926247	0.000597164	16.7598	0.0153496	0.00125649	16.7596	0.0209879	0.00181399	16.7595	0.0266758	0.00227956	16.7586	0.0303146	0.00220153	16.7597	0.0356812	0.00264129	16.7589	0.0391937	0.00399148
16.9172	0.00316136	0.000321649	16.917	0.00925685	0.000568688	16.9171	0.0152344	0.000918572	16.917	0.0209779	0.00154448	16.9169	0.0267612	0.00190965	16.916	0.0302295	0.00229475	16.9171	0.0355694	0.00229256	16.9163	0.0394344	0.00536941
17.0745	0.00316672	0.000302605	17.0743	0.00925356	0.00051103	17.0745	0.0152336	0.00116453	17.0743	0.0210502	0.0014148	17.0743	0.0265695	0.00164549	17.0733	0.0302338	0.00199715	17.0745	0.0355256	0.00244797	17.0737	0.0393602	0.00476724
17.2319	0.00316779	0.000314939	17.2317	0.00929757	0.000488561	17.2319	0.0152737	0.00126521	17.2317	0.0210027	0.00161894	17.2316	0.0265976	0.00173599	17.2307	0.0301033	0.00229255	17.2319	0.0354649	0.00148579	17.231	0.0392969	0.00408166
17.3893	0.00316645	0.000234179	17.3891	0.00928573	0.000606897	17.3892	0.0153155	0.00145635	17.3891	0.0210238	0.00157375	17.389	0.0265607	0.00142497	17.3881	0.0301249	0.0021275	17.3892	0.0356117	0.0015851	17.3884	0.0392581	0.00374477
17.5466	0.00317859	0.000269414	17.5464	0.0092918	0.000471612	17.5466	0.0153071	0.00141437	17.5464	0.0209714	0.00180325	17.5464	0.0264799	0.00134282	17.5454	0.0301773	0.00234482	17.5466	0.0358045	0.00186577	17.5458	0.0393588	0.00512481
17.704	0.00316993	0.000255589	17.7038	0.00924668	0.000443404	17.704	0.0153049	0.00127494	17.7038	0.0210331	0.00195012	17.7037	0.0264948	0.00193943	17.7028	0.0301482	0.00245636	17.704	0.0355271	0.001674	17.7031	0.0395388	0.00550524
17.8614	0.00316555	0.000240078	17.8612	0.00925415	0.000409595	17.8614	0.0153154	0.00138291	17.8612	0.0210682	0.00175036	17.8611	0.0266524	0.0017181	17.8601	0.0303569	0.00276479	17.8613	0.0356206	0.00125228	17.8605	0.0393159	0.00460079
18.0188	0.0031566	0.000180814	18.0186	0.00927274	0.000568223	18.0187	0.015316	0.00146008	18.0186	0.0210465	0.00175451	18.0185	0.0265864	0.00188063	18.0175	0.0301713	0.0027043	18.0187	0.0354209	0.00129427	18.0178	0.0392197	0.0043207
18.1761	0.00318045	0.000194829	18.1759	0.00927074	0.000438736	18.1761	0.0153251	0.00164621	18.1759	0.0210853	0.00147747	18.1758	0.0264861	0.00173011	18.1748	0.0300755	0.00218385	18.1761	0.0354099	0.00144103	18.1752	0.0392048	0.00398546
18.3335	0.00317388	0.00020629	18.3333	0.00930311	0.000475526	18.3335	0.0153055	0.00173363	18.3333	0.0208903	0.00134112	18.3332	0.0265454	0.0017322	18.3322	0.0301697	0.00208928	18.3334	0.035487	0.00150519	18.3326	0.0391071	0.00450826
18.4909	0.00319202	0.000297881	18.4907	0.0093421	0.000569176	18.4908	0.0153317	0.00163417	18.4907	0.0208731	0.00160048	18.4906	0.0263454	0.00174962	18.4896	0.0300607	0.0017014	18.4908	0.0355327	0.00153226	18.4899	0.0390421	0.00331243
18.6482	0.00318114	0.000276664	18.648	0.0092652	0.000493418	18.6482	0.0153588	0.00149948	18.648	0.0210823	0.00179835	18.6479	0.0262625	0.00167054	18.6469	0.0299209	0.0015939	18.6482	0.0355656	0.00162543	18.6473	0.0391575	0.00394698
18.8056	0.00318904	0.00032813	18.8054	0.00924924	0.000706817	18.8056	0.0153839	0.00126209	18.8054	0.0210888	0.00198895	18.8053	0.0261708	0.00177006	18.8043	0.030198	0.00145984	18.8055	0.0354863	0.00196934	18.8046	0.0389608	0.00285999
18.963	0.00315926	0.000255026	18.9628	0.0092782	0.000559173	18.9629	0.0152875	0.00142162	18.9628	0.0211611	0.001841	18.9627	0.0261602	0.00137138	18.9616	0.0301154	0.00142738	18.9629	0.0350979	0.00156798	18.962	0.0390723	0.00229408
19.1203	0.00315485	0.000203199	19.1201	0.00933238	0.000510365	19.1203	0.0153737	0.00153769	19.1201	0.0210744	0.00179132	19.12	0.0262418	0.00136445	19.119	0.0301869	0.00132835	19.1203	0.0352799	0.00151282	19.1194	0.0391934	0.00289055
19.2777	0.0031687	0.000188245	19.2775	0.00928717	0.000547153	19.2777	0.015357	0.00150081	19.2775	0.0210483	0.0015983	19.2774	0.0260725	0.00122455	19.2764	0.0300294	0.00134633	19.2776	0.0352799	0.00178638	19.2767	0.0390165	0.00216655
19.4351	0.00317035	0.000205349	19.4349	0.00929106	0.000556635	19.435	0.015381	0.00141284	19.4349	0.0210868	0.00189799	19.4348	0.026074	0.00192189	19.4337	0.0299438	0.00118916	19.435	0.035305	0.00180737	19.4341	0.0390371	0.00307924
19.5924	0.00316036	0.000185921	19.5922	0.00926169	0.000467369	19.5924	0.015396	0.00144884	19.5922	0.0210907	0.00154424	19.5921	0.026055	0.00161578	19.5911	0.0300753	0.00164735	19.5924	0.0356715	0.00145842	19.5914	0.0392589	0.00281305
19.7498	0.00315794	0.000218762	19.7496	0.00926849	0.000655082	19.7498	0.0153699	0.00131541	19.7496	0.0212413	0.00203382	19.7495	0.0260135	0.00185055	19.7484	0.0301228	0.00131431	19.7497	0.0355789	0.0014088	19.7488	0.039216	0.00261492
19.9072	0.00315549	0.000237994	19.907	0.00926929	0.00041844	19.9071	0.0153785	0.00155229	19.907	0.0212958	0.00194328	19.9069	0.0260222	0.00234712	19.9058	0.030182	0.00139993	19.9071	0.0355355	0.00191101	19.9062	0.0389856	0.00273718

## Sheet: T=0.8Tc,W=2.31kTc
y-coordinate, averaged density profile ρf*(y), and uncertainty of the averaged density profile Δρf*(y) of the adsorption isotherm for:
T / Tc = 0.8,
ρs / σf-3 = 1.07, and
Ϛ = 0.75.
The averaged density profiles are indicated with the respective bulk fluid pressure pfb / esf-3.
pfb / esf-3 =	0.00255(42)		pfb / esf-3 =	0.00725(18)		pfb / esf-3 =	0.01133(39)		pfb / esf-3 =	0.0149(7)		pfb / esf-3 =	0.0163(5)		pfb / esf-3 =	0.01770(33)		pfb / esf-3 =	0.01898(47)		pfb / esf-3 =	0.01967(34)		pfb / esf-3 =	0.02056(32)		pfb / esf-3 =	0.0216(6)		pfb / esf-3 =	0.0224(8)		pfb / esf-3 =	0.0224(10)		pfb / esf-3 =	0.0231(13)		pfb / esf-3 =	0.0231(9)
y / σf	ρf*(y) / σf-3	Δρf*(y) / σf-3	y / σf	ρf*(y) / σf-3	Δρf*(y) / σf-3	y / σf	ρf*(y) / σf-3	Δρf*(y) / σf-3	y / σf	ρf*(y) / σf-3	Δρf*(y) / σf-3	y / σf	ρf*(y) / σf-3	Δρf*(y) / σf-3	y / σf	ρf*(y) / σf-3	Δρf*(y) / σf-3	y / σf	ρf*(y) / σf-3	Δρf*(y) / σf-3	y / σf	ρf*(y) / σf-3	Δρf*(y) / σf-3	y / σf	ρf*(y) / σf-3	Δρf*(y) / σf-3	y / σf	ρf*(y) / σf-3	Δρf*(y) / σf-3	y / σf	ρf*(y) / σf-3	Δρf*(y) / σf-3	y / σf	ρf*(y) / σf-3	Δρf*(y) / σf-3	y / σf	ρf*(y) / σf-3	Δρf*(y) / σf-3	y / σf	ρf*(y) / σf-3	Δρf*(y) / σf-3
4.79975	3.51693e-05	7.62664e-05	4.7997	0.000108798	0.000200369	4.79975	5.64378e-05	6.59332e-05	4.7997	0.000285123	0.000246495	4.79974	0	0	4.79968	0	0	4.79966	0.000200408	0.000249962	4.79942	0	0	4.79965	0	0	4.79974	0	0	4.79943	0	0	4.79951	0	0	4.79976	0	0	4.79962	0	0
4.95712	1.71596e-05	2.93482e-05	4.95707	6.54718e-05	0.000114975	4.95712	2.8454e-05	2.83813e-05	4.95707	0.000283446	0.000132438	4.95711	0	0	4.95704	0	0	4.95703	0.00012194	0.000150479	4.95678	0	0	4.95701	0	0	4.95711	0	0	4.95678	0	0	4.95687	0	0	4.95713	0	0	4.95699	0	0
5.11449	1.04944e-05	1.64062e-05	5.11444	3.83179e-05	4.20998e-05	5.11448	1.49837e-05	1.75623e-05	5.11444	0.000145886	4.58869e-05	5.11448	0	0	5.11441	0	0	5.1144	8.12947e-05	0.000102808	5.11414	0	0	5.11438	0	0	5.11448	0	0	5.11414	0	0	5.11423	0	0	5.1145	0	0	5.11435	0	0
5.27186	6.90246e-06	1.08857e-05	5.2718	3.22688e-05	2.77924e-05	5.27185	1.8819e-05	2.1716e-05	5.2718	8.96078e-05	4.80064e-05	5.27184	1.11085e-05	2.30114e-06	5.27178	1.41205e-05	3.46472e-06	5.27176	8.67372e-05	2.12255e-05	5.27149	2.0751e-05	7.90359e-06	5.27174	2.47441e-05	6.87762e-06	5.27184	3.15371e-05	6.27557e-06	5.2715	3.36889e-05	1.11578e-05	5.27159	4.10035e-05	2.77965e-06	5.27187	4.67048e-05	7.29958e-06	5.27172	4.84224e-05	7.68285e-06
5.42923	0.00267884	0.000173275	5.42917	0.00906708	0.0010449	5.42922	0.0172094	0.00137782	5.42917	0.0274563	0.00162192	5.42921	0.0322665	0.00218387	5.42914	0.0400855	0.00239305	5.42913	0.0480647	0.0032785	5.42885	0.0534632	0.0023707	5.42911	0.0652586	0.00245897	5.42921	0.0763048	0.00172209	5.42886	0.0838639	0.00222114	5.42895	0.101659	0.00283739	5.42924	0.108802	0.00574268	5.42908	0.120924	0.00397729
5.5866	0.0287725	0.00206266	5.58654	0.0959455	0.0105336	5.58659	0.178341	0.0138238	5.58654	0.277471	0.0142664	5.58658	0.321671	0.0222117	5.58651	0.392708	0.0217714	5.58649	0.463335	0.0269396	5.58621	0.511353	0.0201724	5.58648	0.606024	0.0232785	5.58658	0.693399	0.0152241	5.58622	0.754276	0.021528	5.58632	0.887373	0.0194652	5.58661	0.939671	0.0456387	5.58645	1.02635	0.0339712
5.74397	0.0445025	0.00282323	5.7439	0.143648	0.0134455	5.74396	0.25949	0.016574	5.7439	0.39333	0.0181987	5.74395	0.45163	0.0260433	5.74388	0.539413	0.0212815	5.74386	0.62569	0.0280658	5.74357	0.68428	0.0217495	5.74384	0.786058	0.0261159	5.74395	0.878621	0.00566314	5.74358	0.946886	0.0159612	5.74368	1.07158	0.0310014	5.74398	1.12105	0.0347268	5.74381	1.19397	0.0259944
5.90134	0.0232842	0.001218	5.90127	0.0741215	0.0057226	5.90133	0.132569	0.00787828	5.90127	0.19888	0.00994378	5.90132	0.228905	0.0114703	5.90124	0.27048	0.00468517	5.90122	0.313146	0.0126537	5.90092	0.34086	0.0110107	5.90121	0.386666	0.0163244	5.90132	0.429151	0.00771765	5.90093	0.461187	0.00468451	5.90104	0.511505	0.0188354	5.90135	0.532591	0.0107278	5.90118	0.5603	0.00526399
6.05871	0.010803	0.000395405	6.05864	0.0344013	0.00242442	6.0587	0.0624431	0.00368352	6.05864	0.0947707	0.00556547	6.05869	0.109806	0.00576997	6.05861	0.130153	0.00152007	6.05859	0.15291	0.00621747	6.05828	0.167116	0.00575333	6.05857	0.191509	0.0112089	6.05869	0.214558	0.00706478	6.05829	0.231709	0.00599298	6.0584	0.259666	0.011553	6.05872	0.272083	0.00816418	6.05854	0.28742	0.0032513
6.21608	0.00646644	0.000250343	6.21601	0.0209986	0.00149299	6.21607	0.0388452	0.00225295	6.21601	0.0607275	0.00346786	6.21606	0.0715381	0.0040008	6.21598	0.0860947	0.00150304	6.21596	0.102768	0.00554542	6.21564	0.114253	0.00508155	6.21594	0.133984	0.00900768	6.21606	0.154653	0.00669194	6.21565	0.170115	0.00488267	6.21576	0.197853	0.0079707	6.21609	0.209859	0.00680403	6.21591	0.227835	0.00352622
6.37344	0.00478485	0.0002282	6.37337	0.0160886	0.00136302	6.37343	0.0306911	0.00194826	6.37337	0.0502563	0.00345739	6.37342	0.0602651	0.00370789	6.37334	0.0760538	0.00144872	6.37332	0.0937643	0.00624059	6.373	0.107145	0.00607093	6.3733	0.133722	0.00909734	6.37342	0.16267	0.00795448	6.37301	0.185657	0.00389006	6.37312	0.233979	0.00940582	6.37345	0.254608	0.0100362	6.37327	0.294919	0.00629312
6.53081	0.00404319	0.000200131	6.53074	0.0140202	0.00119725	6.5308	0.0284084	0.00263911	6.53074	0.0494109	0.00317139	6.53079	0.0612716	0.00422045	6.53071	0.0818043	0.0033722	6.53069	0.105923	0.00840204	6.53036	0.125138	0.00742549	6.53067	0.167623	0.0144082	6.53079	0.214585	0.0120392	6.53037	0.255712	0.00387195	6.53048	0.346627	0.0148355	6.53082	0.384668	0.0212303	6.53064	0.470829	0.0133614
6.68818	0.0036686	0.000148183	6.68811	0.0129163	0.000961815	6.68817	0.0269314	0.00236663	6.68811	0.0482127	0.0036307	6.68816	0.0608327	0.00356008	6.68808	0.0827922	0.00387	6.68805	0.108002	0.00900167	6.68771	0.129282	0.00852908	6.68803	0.175772	0.0177908	6.68816	0.228865	0.0125867	6.68773	0.276919	0.00804471	6.68784	0.37728	0.0178543	6.68819	0.41969	0.0246231	6.688	0.517774	0.0110864
6.84555	0.00341585	0.000141636	6.84548	0.0118527	0.000935099	6.84554	0.0238364	0.00222234	6.84548	0.0414471	0.00308649	6.84553	0.0516356	0.00294257	6.84544	0.0682667	0.00217759	6.84542	0.0881975	0.00771396	6.84507	0.10515	0.00766253	6.8454	0.139647	0.0141797	6.84553	0.1798	0.0104339	6.84508	0.217083	0.00647288	6.8452	0.290623	0.0178891	6.84556	0.322155	0.0181725	6.84537	0.395348	0.00574317
7.00292	0.00325155	0.000157575	7.00284	0.0107667	0.000638045	7.00291	0.0204333	0.00156341	7.00284	0.0337932	0.00221062	7.0029	0.041387	0.00242759	7.00281	0.0527205	0.00170554	7.00279	0.0668055	0.00481294	7.00243	0.0782295	0.0058932	7.00276	0.101875	0.0123241	7.0029	0.128881	0.00859991	7.00244	0.154818	0.00624613	7.00256	0.205011	0.013879	7.00293	0.227753	0.0123078	7.00273	0.281656	0.00675404
7.16029	0.00315805	0.000101783	7.16021	0.00994122	0.00061156	7.16028	0.0181892	0.00136454	7.16021	0.0285926	0.00174193	7.16027	0.0344398	0.00223366	7.16018	0.0429091	0.00130464	7.16015	0.0530368	0.00446956	7.15979	0.0617067	0.00631513	7.16013	0.0788185	0.00968456	7.16027	0.0997626	0.00837179	7.1598	0.120008	0.00667979	7.15993	0.160106	0.0118221	7.1603	0.179546	0.0110799	7.1601	0.228203	0.00620113
7.31766	0.00312659	0.000107361	7.31758	0.0095402	0.00072629	7.31765	0.0168937	0.00111163	7.31758	0.0257185	0.00140273	7.31764	0.0303762	0.0012229	7.31754	0.0373855	0.00199718	7.31752	0.0459568	0.00407644	7.31715	0.052957	0.0050693	7.3175	0.0672861	0.00899236	7.31764	0.0861751	0.00793818	7.31716	0.105069	0.00550593	7.31729	0.144874	0.0110836	7.31767	0.16423	0.00864855	7.31746	0.219678	0.0056534
7.47503	0.00306509	7.94953e-05	7.47494	0.00936094	0.000751791	7.47502	0.0161811	0.00115498	7.47494	0.0239138	0.000989961	7.475	0.0280507	0.000650205	7.47491	0.034133	0.00196473	7.47488	0.0418825	0.00392371	7.4745	0.047788	0.00440501	7.47486	0.0617116	0.00910716	7.475	0.0795029	0.00790605	7.47452	0.0995365	0.00684131	7.47465	0.141841	0.0123875	7.47504	0.162514	0.0113176	7.47483	0.230536	0.00673827
7.6324	0.00306179	7.423e-05	7.63231	0.00922824	0.000681919	7.63238	0.0158355	0.00140615	7.63231	0.0229286	0.00158935	7.63237	0.0267986	0.000734204	7.63228	0.0318686	0.00198815	7.63225	0.0388048	0.00389208	7.63186	0.0444211	0.00420328	7.63223	0.0568265	0.00838891	7.63237	0.0728894	0.00813908	7.63188	0.0928772	0.00712153	7.63201	0.133643	0.0116693	7.63241	0.153376	0.012295	7.63219	0.225103	0.00604085
7.78977	0.00306343	6.07811e-05	7.78968	0.00915394	0.000676024	7.78975	0.0152777	0.000965033	7.78968	0.0219819	0.00136926	7.78974	0.0255748	0.0012185	7.78964	0.0301368	0.001936	7.78962	0.0360082	0.00345174	7.78922	0.0406601	0.00377734	7.78959	0.0507844	0.00806998	7.78974	0.0643936	0.00727809	7.78923	0.081481	0.0073024	7.78937	0.11504	0.0117544	7.78978	0.132068	0.010571	7.78956	0.193843	0.00649963
7.94713	0.00307054	9.78006e-05	7.94705	0.00906172	0.000616081	7.94712	0.0150244	0.000985224	7.94705	0.0212752	0.00119334	7.94711	0.0246073	0.00136235	7.94701	0.0285541	0.00207337	7.94698	0.0335452	0.00339902	7.94658	0.037169	0.00337613	7.94696	0.0452413	0.00707826	7.94711	0.0558136	0.00606996	7.94659	0.0694917	0.00695337	7.94673	0.0948994	0.00999125	7.94715	0.108657	0.0103604	7.94692	0.158313	0.00821057
8.1045	0.00305148	0.000119767	8.10441	0.00902692	0.000634908	8.10449	0.0149729	0.0010574	8.10441	0.0207125	0.000934121	8.10448	0.0236522	0.00116877	8.10437	0.0272209	0.00163144	8.10435	0.0315218	0.00300722	8.10394	0.0346539	0.00385766	8.10432	0.0407126	0.00556683	8.10448	0.0494392	0.0049087	8.10395	0.0599538	0.00558538	8.10409	0.0805431	0.00907668	8.10452	0.0910673	0.0073378	8.10428	0.133368	0.00731005
8.26187	0.00304609	0.000136798	8.26178	0.00896253	0.000551897	8.26186	0.0146937	0.000762293	8.26178	0.0203143	0.000900702	8.26185	0.0231194	0.00155629	8.26174	0.0264325	0.00201385	8.26171	0.0299744	0.00253092	8.2613	0.0327515	0.00330305	8.26169	0.0379251	0.0046775	8.26185	0.0449554	0.00504068	8.26131	0.0533523	0.00535186	8.26145	0.0704933	0.00900193	8.26189	0.0795863	0.00524118	8.26165	0.118268	0.00667672
8.41924	0.00303276	8.21255e-05	8.41915	0.00893457	0.000426273	8.41923	0.0146873	0.000756528	8.41915	0.0199753	0.0003679	8.41921	0.0228032	0.00173612	8.41911	0.0260149	0.00236223	8.41908	0.0291653	0.00302712	8.41865	0.0311862	0.00300683	8.41905	0.0356863	0.00410219	8.41921	0.04158	0.00419541	8.41867	0.0491075	0.0052562	8.41881	0.0639168	0.00838918	8.41925	0.0717388	0.00447262	8.41901	0.107986	0.0070227
8.57661	0.00303062	5.90213e-05	8.57652	0.0089585	0.000594142	8.5766	0.014561	0.000928877	8.57652	0.0198951	0.000386983	8.57658	0.0226046	0.00185646	8.57647	0.0254407	0.00204849	8.57645	0.0286936	0.00298814	8.57601	0.0302562	0.0026304	8.57642	0.0342858	0.00483428	8.57658	0.039364	0.00426678	8.57602	0.046025	0.00514695	8.57617	0.0580347	0.00788983	8.57662	0.0649532	0.00530762	8.57638	0.0981388	0.00773259
8.73398	0.00302829	7.19742e-05	8.73388	0.00899405	0.000701753	8.73397	0.0145129	0.000958355	8.73388	0.0197674	0.000390769	8.73395	0.0224461	0.00194692	8.73384	0.0250808	0.00222533	8.73381	0.027986	0.00239921	8.73337	0.0295027	0.00239825	8.73379	0.0329904	0.00460875	8.73395	0.0373477	0.00311129	8.73338	0.0429119	0.00519004	8.73354	0.0525241	0.00816795	8.73399	0.0587739	0.00472996	8.73374	0.0870299	0.00805049
8.89135	0.00303168	0.000128323	8.89125	0.00897776	0.000676181	8.89133	0.0145461	0.00131701	8.89125	0.0197639	0.000469371	8.89132	0.0221863	0.00145172	8.89121	0.0248781	0.00230633	8.89118	0.0276092	0.00259376	8.89073	0.029048	0.00251311	8.89115	0.0321922	0.00364017	8.89132	0.0357686	0.00363108	8.89074	0.0405751	0.00480743	8.8909	0.0479836	0.00679638	8.89136	0.0529243	0.00437693	8.89111	0.0761991	0.00701847
9.04872	0.00303581	0.000135365	9.04862	0.00896902	0.000571182	9.0487	0.0145223	0.00117746	9.04862	0.019601	0.000675505	9.04869	0.0221807	0.00140409	9.04857	0.0246913	0.00247382	9.04854	0.0272494	0.00279603	9.04809	0.0284383	0.00238589	9.04852	0.0314948	0.00366081	9.04869	0.0343017	0.00325099	9.0481	0.0384192	0.00393853	9.04826	0.0445072	0.0058498	9.04873	0.0482871	0.00389345	9.04847	0.0673154	0.00541771
9.20609	0.00303681	0.000135036	9.20598	0.00890034	0.000640905	9.20607	0.0145157	0.00126048	9.20598	0.0195881	0.000608372	9.20606	0.022088	0.00181162	9.20594	0.0245308	0.00255424	9.20591	0.0271899	0.00296367	9.20544	0.0281167	0.0024037	9.20588	0.0310827	0.00332588	9.20606	0.0334927	0.00324128	9.20546	0.0367203	0.00397353	9.20562	0.0416972	0.00593836	9.2061	0.0449861	0.0029538	9.20584	0.0605115	0.00481164
9.36346	0.00306087	0.000185797	9.36335	0.00891872	0.000742294	9.36344	0.0145768	0.00136586	9.36335	0.0196151	0.00121	9.36343	0.0220166	0.00157726	9.36331	0.0244291	0.00244139	9.36328	0.0270725	0.00308796	9.3628	0.0278428	0.00141829	9.36325	0.0305943	0.00367617	9.36343	0.0327673	0.00350509	9.36282	0.0356838	0.00349604	9.36298	0.0396509	0.00523967	9.36347	0.0421206	0.00438859	9.3632	0.0551527	0.00405472
9.52082	0.00307326	0.000183064	9.52072	0.00893728	0.00074865	9.52081	0.0145678	0.00126181	9.52072	0.0196955	0.00102647	9.52079	0.021899	0.00180699	9.52067	0.0241317	0.00230774	9.52064	0.0266996	0.00265496	9.52016	0.0277014	0.00197547	9.52061	0.0300619	0.00318562	9.52079	0.0323172	0.00298159	9.52017	0.034731	0.00303788	9.52034	0.0380252	0.00518655	9.52084	0.040171	0.0039237	9.52057	0.0512113	0.00480936
9.67819	0.00306253	0.00014978	9.67809	0.00882313	0.000477819	9.67818	0.014533	0.00109746	9.67809	0.0197558	0.00107193	9.67816	0.0219333	0.00142922	9.67804	0.0241714	0.00222914	9.67801	0.0267264	0.00307684	9.67752	0.0276779	0.00241945	9.67798	0.0297634	0.00367404	9.67816	0.0319818	0.00283198	9.67753	0.0341312	0.00299375	9.6777	0.0367964	0.00477652	9.67821	0.0386939	0.00341822	9.67793	0.0476508	0.00477863
9.83556	0.00307444	0.000137334	9.83545	0.00884106	0.000421693	9.83555	0.0145295	0.000929661	9.83545	0.0198841	0.00106311	9.83553	0.0218279	0.00111465	9.83541	0.0241985	0.00240112	9.83537	0.0266018	0.00266859	9.83488	0.0274869	0.00212871	9.83534	0.0298015	0.00374893	9.83553	0.0318248	0.00342489	9.83489	0.033499	0.00314771	9.83506	0.0356785	0.00431094	9.83558	0.0371408	0.00377877	9.8353	0.0446646	0.00388968
9.99293	0.00308328	0.000158935	9.99282	0.00882611	0.000466021	9.99292	0.014456	0.000929534	9.99282	0.0196802	0.00102441	9.9929	0.0216889	0.00149471	9.99277	0.024157	0.00256508	9.99274	0.0263668	0.00203601	9.99223	0.0273563	0.00218049	9.99271	0.0298002	0.00388872	9.9929	0.0315579	0.00405961	9.99225	0.0331176	0.00302098	9.99242	0.0350996	0.00390412	9.99295	0.0359872	0.00332343	9.99266	0.0422591	0.00387033
10.1503	0.00306441	0.000142388	10.1502	0.00883713	0.000384023	10.1503	0.0143486	0.000885807	10.1502	0.0196468	0.000819174	10.1503	0.0218314	0.0018007	10.1501	0.0241783	0.00196197	10.1501	0.0264134	0.00248302	10.1496	0.0273214	0.00198607	10.1501	0.0296607	0.00364924	10.1503	0.0314466	0.00358721	10.1496	0.0330401	0.00282314	10.1498	0.0343412	0.00304054	10.1503	0.0354091	0.0036612	10.15	0.0402655	0.0039241
10.3077	0.00305969	0.000148431	10.3076	0.00888216	0.000468631	10.3077	0.0145259	0.00120338	10.3076	0.0197317	0.00112026	10.3076	0.0217898	0.00150303	10.3075	0.0240763	0.00203143	10.3075	0.0264794	0.00248809	10.3069	0.0274165	0.00234982	10.3074	0.0296185	0.00380727	10.3076	0.0311876	0.00352487	10.307	0.0328721	0.00310136	10.3071	0.0336987	0.00300592	10.3077	0.0347763	0.0045529	10.3074	0.0385498	0.00337416
10.465	0.00306925	0.000134591	10.4649	0.00889447	0.000468093	10.465	0.0144178	0.000935395	10.4649	0.0197995	0.000890382	10.465	0.0218219	0.00138348	10.4649	0.0240753	0.00198642	10.4648	0.0266102	0.00217076	10.4643	0.0273921	0.00278198	10.4648	0.0294944	0.00355491	10.465	0.0309616	0.0028977	10.4643	0.0325587	0.00263866	10.4645	0.0329894	0.00339967	10.4651	0.0341862	0.00414719	10.4648	0.0374774	0.00317424
10.6224	0.00306686	0.00013317	10.6223	0.00886281	0.000566385	10.6224	0.0144683	0.000987882	10.6223	0.0196017	0.000658788	10.6224	0.0219102	0.00148307	10.6222	0.024104	0.00226997	10.6222	0.0265231	0.00237114	10.6217	0.0275204	0.00259195	10.6222	0.029372	0.00358621	10.6224	0.0307919	0.00272297	10.6217	0.0326223	0.00247967	10.6219	0.0328852	0.003557	10.6224	0.0342547	0.0041404	10.6221	0.0364132	0.00227147
10.7798	0.00306961	0.000123294	10.7797	0.00888765	0.000619639	10.7798	0.0144604	0.00114333	10.7797	0.0195514	0.000563057	10.7797	0.0218659	0.00156993	10.7796	0.0242584	0.0023807	10.7796	0.0266828	0.00244791	10.779	0.0274682	0.00276632	10.7795	0.029557	0.00345687	10.7797	0.0308924	0.00284265	10.779	0.032598	0.00274628	10.7792	0.0329711	0.0037895	10.7798	0.0337696	0.00401913	10.7795	0.0356133	0.00321586
10.9371	0.00307421	0.000113891	10.937	0.00884502	0.000690677	10.9371	0.0144677	0.00110045	10.937	0.0195386	0.00059155	10.9371	0.0218681	0.00165457	10.937	0.0241402	0.00213587	10.9369	0.0266896	0.00334877	10.9364	0.0273338	0.00201369	10.9369	0.0294434	0.0032424	10.9371	0.0308163	0.00197192	10.9364	0.032309	0.002733	10.9366	0.0327673	0.00346385	10.9372	0.0333012	0.00349746	10.9369	0.0351737	0.00289116
11.0945	0.00306651	0.000122949	11.0944	0.00884403	0.000598033	11.0945	0.0144389	0.00106967	11.0944	0.0196319	0.00124993	11.0945	0.021981	0.00225223	11.0943	0.0241327	0.00211308	11.0943	0.0265679	0.00277369	11.0937	0.0273003	0.00179695	11.0943	0.0293972	0.00325494	11.0945	0.0307414	0.00253867	11.0938	0.0322969	0.00303234	11.094	0.0325881	0.00357588	11.0945	0.0333305	0.00384778	11.0942	0.03456	0.00260061
11.2519	0.00306598	0.000122974	11.2518	0.00880964	0.000587014	11.2519	0.0144797	0.0010185	11.2518	0.0195724	0.0011789	11.2518	0.021914	0.00187834	11.2517	0.0240645	0.00193519	11.2517	0.0264244	0.00279567	11.2511	0.027217	0.00175754	11.2516	0.0293457	0.00333123	11.2518	0.03055	0.00215299	11.2511	0.0320465	0.00328567	11.2513	0.0324646	0.00323783	11.2519	0.033141	0.00370382	11.2516	0.0342769	0.00195579
11.4093	0.0030602	0.00017693	11.4091	0.00885015	0.000626569	11.4092	0.0144054	0.00126111	11.4091	0.0195217	0.000715817	11.4092	0.0219906	0.00166321	11.4091	0.0239929	0.00197937	11.409	0.0263246	0.00247039	11.4085	0.0273919	0.00249707	11.409	0.0293543	0.00285564	11.4092	0.0303976	0.00260592	11.4085	0.0320028	0.00255382	11.4087	0.0321625	0.00271947	11.4093	0.0330958	0.00398274	11.4089	0.0344671	0.0020164
11.5666	0.00307621	0.000182362	11.5665	0.00891214	0.000707433	11.5666	0.0143925	0.00109935	11.5665	0.0195672	0.000677302	11.5666	0.021869	0.000984644	11.5664	0.0240685	0.00218608	11.5664	0.0262845	0.00278587	11.5658	0.0273853	0.00187342	11.5664	0.0292884	0.00259302	11.5666	0.0304099	0.00289828	11.5658	0.0320002	0.00318415	11.566	0.0319892	0.00244383	11.5666	0.032963	0.00307673	11.5663	0.0339152	0.00206815
11.724	0.00306923	0.000197873	11.7239	0.00887523	0.000863822	11.724	0.0144071	0.00133775	11.7239	0.0195006	0.000423232	11.724	0.0218493	0.00114091	11.7238	0.0240527	0.00255541	11.7238	0.0263491	0.00248185	11.7232	0.0273717	0.00198426	11.7237	0.0294431	0.00232711	11.724	0.0302769	0.00303993	11.7232	0.0321381	0.00258151	11.7234	0.0321959	0.0025399	11.724	0.0329096	0.00270414	11.7237	0.0338733	0.00269028
11.8814	0.00308243	0.000199165	11.8812	0.00888671	0.000822358	11.8813	0.0144009	0.00131812	11.8812	0.0194856	0.000968124	11.8813	0.0217765	0.00115527	11.8812	0.0241273	0.00229179	11.8811	0.02625	0.00275405	11.8805	0.0273925	0.00248911	11.8811	0.0295309	0.00262745	11.8813	0.0304167	0.00305373	11.8805	0.0322989	0.00291988	11.8808	0.0324942	0.0029979	11.8814	0.0327158	0.00291802	11.881	0.0335953	0.0024303
12.0387	0.0030765	0.000225285	12.0386	0.00892323	0.000805904	12.0387	0.0143809	0.001158	12.0386	0.0196749	0.000947966	12.0387	0.0219435	0.00154112	12.0385	0.0239899	0.00187516	12.0385	0.0264796	0.00272477	12.0379	0.0274627	0.00237991	12.0385	0.0294455	0.00207755	12.0387	0.0306379	0.00274685	12.0379	0.0318768	0.0026061	12.0381	0.0322572	0.00227166	12.0387	0.0326484	0.00293406	12.0384	0.0336148	0.00320148
12.1961	0.00306451	0.000170004	12.196	0.00886385	0.000776211	12.1961	0.0143926	0.00111719	12.196	0.0196657	0.000632567	12.1961	0.0218824	0.00145162	12.1959	0.0239082	0.00182854	12.1959	0.0262531	0.0023161	12.1952	0.0272824	0.00224299	12.1958	0.0295744	0.00264444	12.1961	0.0305158	0.00254856	12.1953	0.0322772	0.00286321	12.1955	0.0322419	0.00263138	12.1961	0.0325655	0.00304169	12.1958	0.0336458	0.00292773
12.3535	0.00308604	0.000164692	12.3533	0.00881972	0.000597288	12.3534	0.014438	0.00115217	12.3533	0.0197574	0.00116187	12.3534	0.0219686	0.00171802	12.3533	0.0240577	0.00193473	12.3532	0.026281	0.0019262	12.3526	0.0272499	0.00214249	12.3532	0.0296182	0.00255442	12.3534	0.0305249	0.00260871	12.3526	0.0320352	0.0029251	12.3528	0.0319001	0.00196099	12.3535	0.0327198	0.00322626	12.3531	0.0334645	0.00276068
12.5108	0.00307279	0.000172348	12.5107	0.00879645	0.000631849	12.5108	0.0144749	0.0011757	12.5107	0.019712	0.00133547	12.5108	0.0219175	0.00139679	12.5106	0.0240402	0.0024135	12.5106	0.0261946	0.00219616	12.51	0.0272771	0.00191114	12.5106	0.0296486	0.00243806	12.5108	0.0306089	0.00337907	12.51	0.0320801	0.00334353	12.5102	0.0316725	0.00148689	12.5109	0.0327704	0.00292074	12.5105	0.0333622	0.00302368
12.6682	0.00307075	0.000169512	12.6681	0.0088324	0.00060434	12.6682	0.0145111	0.00131576	12.6681	0.0196655	0.00155928	12.6682	0.0219487	0.00148911	12.668	0.0241167	0.00198682	12.668	0.0262051	0.00233217	12.6673	0.0272621	0.00139903	12.6679	0.0294665	0.00195989	12.6682	0.0306458	0.0026917	12.6673	0.0317912	0.00211999	12.6676	0.0315956	0.00132414	12.6682	0.0327775	0.00354078	12.6679	0.0333703	0.00336206
12.8256	0.00308238	0.000163085	12.8254	0.00885075	0.000502375	12.8256	0.0144133	0.000932267	12.8254	0.0196774	0.00122661	12.8255	0.0219588	0.00167434	12.8254	0.0240968	0.00254865	12.8253	0.0262289	0.00185581	12.8247	0.0272732	0.00173483	12.8253	0.0294125	0.00220008	12.8255	0.0305524	0.00209091	12.8247	0.0316627	0.00210712	12.8249	0.0319397	0.00141293	12.8256	0.0326376	0.00367818	12.8252	0.0333587	0.00348313
12.9829	0.00307415	0.000114695	12.9828	0.00884304	0.000399518	12.9829	0.014486	0.00090967	12.9828	0.0196686	0.00108401	12.9829	0.0218129	0.00133626	12.9827	0.0240745	0.0020262	12.9827	0.0262333	0.00169883	12.982	0.0274337	0.00233356	12.9827	0.0293541	0.00164297	12.9829	0.0304891	0.00281962	12.9821	0.0317995	0.00275665	12.9823	0.031943	0.00164596	12.983	0.0325795	0.00339402	12.9826	0.0334432	0.0035495
13.1403	0.00308182	0.000170095	13.1402	0.0088719	0.000471259	13.1403	0.0144864	0.000882189	13.1402	0.0196334	0.00119002	13.1403	0.0218368	0.00148566	13.1401	0.0241148	0.0021593	13.1401	0.0261955	0.0023001	13.1394	0.0273845	0.00199381	13.14	0.0293998	0.001534	13.1403	0.0304897	0.0027195	13.1394	0.0316522	0.00248011	13.1396	0.0320145	0.00154452	13.1403	0.032752	0.00342184	13.14	0.0333627	0.00284339
13.2977	0.00307652	0.000159251	13.2975	0.00888381	0.000570411	13.2977	0.0144747	0.000944797	13.2975	0.0196907	0.000817574	13.2976	0.0219042	0.00163921	13.2975	0.0240215	0.002719	13.2974	0.0263773	0.00223385	13.2968	0.0271888	0.00219564	13.2974	0.0295569	0.00191634	13.2976	0.0307721	0.00336072	13.2968	0.031756	0.00293382	13.297	0.0320564	0.00125941	13.2977	0.0327897	0.00337079	13.2973	0.0335715	0.00331888
13.455	0.00308267	0.000195108	13.4549	0.00891853	0.000606047	13.455	0.0144966	0.000883088	13.4549	0.0197772	0.00141969	13.455	0.0219208	0.00221769	13.4548	0.0242286	0.00209611	13.4548	0.026279	0.00236121	13.4541	0.0274327	0.002123	13.4548	0.0293588	0.0018454	13.455	0.0305977	0.00308021	13.4541	0.031837	0.00290033	13.4544	0.0320663	0.00182714	13.4551	0.0327211	0.00303903	13.4547	0.0337092	0.00295406
13.6124	0.00307681	0.000232755	13.6123	0.00893841	0.000750895	13.6124	0.0145762	0.00107647	13.6123	0.0197617	0.0011494	13.6124	0.0219524	0.00212575	13.6122	0.02426	0.00294558	13.6122	0.0261352	0.00231979	13.6115	0.0276018	0.00219387	13.6121	0.0292162	0.00190169	13.6124	0.0305664	0.00332675	13.6115	0.0320769	0.00190042	13.6117	0.03195	0.00167639	13.6124	0.0328633	0.00310324	13.6121	0.0334998	0.00278216
13.7698	0.00307373	0.000264062	13.7696	0.00893253	0.000630178	13.7698	0.0146295	0.00112183	13.7696	0.019743	0.00129797	13.7697	0.0219397	0.00219454	13.7696	0.0242011	0.00274463	13.7695	0.0261984	0.00217285	13.7688	0.0276375	0.00253307	13.7695	0.0292296	0.00185457	13.7697	0.0303781	0.00239963	13.7688	0.0317931	0.00206869	13.7691	0.0317516	0.00123235	13.7698	0.0328369	0.00308256	13.7694	0.0335507	0.00308612
13.9272	0.00308056	0.000284371	13.927	0.00893288	0.000666873	13.9271	0.0146273	0.00104158	13.927	0.0197635	0.00147522	13.9271	0.0220521	0.00191492	13.9269	0.0239867	0.00197431	13.9269	0.0261154	0.00194512	13.9262	0.0276685	0.00297783	13.9268	0.029043	0.00163918	13.9271	0.0303039	0.00237884	13.9262	0.0317812	0.00227909	13.9264	0.0319475	0.00160162	13.9272	0.032972	0.00237931	13.9268	0.0337503	0.00373058
14.0845	0.00308377	0.00024653	14.0844	0.00896811	0.000764194	14.0845	0.0146497	0.00110805	14.0844	0.0197503	0.00166459	14.0845	0.0219821	0.00191157	14.0843	0.0241354	0.00238185	14.0843	0.0262249	0.00152029	14.0835	0.0276414	0.00262205	14.0842	0.0289846	0.00170421	14.0845	0.0301667	0.00251411	14.0836	0.031941	0.00236586	14.0838	0.0321082	0.00207672	14.0845	0.0329159	0.00297527	14.0841	0.0336674	0.00301394
14.2419	0.0031042	0.000208865	14.2417	0.008977	0.000992165	14.2419	0.0146974	0.000925775	14.2417	0.0196416	0.00102776	14.2418	0.0219056	0.00196152	14.2417	0.0241638	0.00225864	14.2416	0.0262155	0.00163024	14.2409	0.0277012	0.00249958	14.2416	0.0290958	0.00140219	14.2418	0.0301571	0.00173299	14.2409	0.0318886	0.00265522	14.2412	0.0321292	0.00175205	14.2419	0.0327125	0.00329976	14.2415	0.0334905	0.00350523
14.3993	0.00309316	0.000243393	14.3991	0.00898029	0.00093258	14.3992	0.0147374	0.000945862	14.3991	0.0197184	0.00119471	14.3992	0.0219547	0.00200929	14.399	0.0242375	0.00272828	14.399	0.0260653	0.00145518	14.3983	0.0276574	0.00248542	14.3989	0.0291695	0.00108331	14.3992	0.0301476	0.00225674	14.3983	0.031427	0.0026552	14.3985	0.0322493	0.00241891	14.3993	0.0327375	0.00359772	14.3989	0.0336671	0.00247973
14.5566	0.00307531	0.000246308	14.5565	0.00899697	0.00083397	14.5566	0.0146731	0.0012425	14.5565	0.019594	0.00114343	14.5566	0.0221438	0.0020667	14.5564	0.0240613	0.00225272	14.5564	0.0260665	0.00163196	14.5556	0.0275798	0.00247939	14.5563	0.0292849	0.00159195	14.5566	0.0303092	0.00280649	14.5556	0.0316745	0.00215142	14.5559	0.0321896	0.00225755	14.5567	0.0328042	0.00367329	14.5562	0.0337405	0.00253611
14.714	0.00307262	0.000303808	14.7138	0.00892026	0.00083562	14.714	0.0147221	0.00119714	14.7138	0.0196575	0.00115567	14.714	0.022141	0.00167407	14.7138	0.024061	0.00233397	14.7137	0.0261377	0.00137289	14.713	0.0276975	0.00232991	14.7137	0.0290594	0.0017543	14.714	0.030425	0.00289953	14.713	0.0317196	0.00241292	14.7133	0.0318092	0.00156523	14.714	0.0328684	0.00373741	14.7136	0.0337332	0.00226995
14.8714	0.00307499	0.000284436	14.8712	0.00895487	0.000949543	14.8713	0.014686	0.00121759	14.8712	0.0197571	0.00092858	14.8713	0.0221025	0.00186287	14.8711	0.0242117	0.00310149	14.8711	0.0262374	0.00153917	14.8703	0.027753	0.00255785	14.871	0.0292204	0.00192646	14.8713	0.0304215	0.00335594	14.8704	0.0316734	0.00197759	14.8706	0.0317054	0.00170276	14.8714	0.0326937	0.00369911	14.871	0.0337353	0.00250422
15.0287	0.00306551	0.000233571	15.0286	0.00900578	0.00106046	15.0287	0.0146635	0.00078463	15.0286	0.0198317	0.00153207	15.0287	0.0219279	0.00169451	15.0285	0.024088	0.00302771	15.0285	0.0262019	0.00188218	15.0277	0.0279268	0.00306045	15.0284	0.0291945	0.00151214	15.0287	0.0303197	0.00262882	15.0277	0.0317782	0.00184552	15.028	0.0317648	0.00160292	15.0288	0.0327031	0.0040613	15.0283	0.0339255	0.00252791
15.1861	0.00306555	0.000213576	15.1859	0.00901071	0.000994719	15.1861	0.0146217	0.000911257	15.1859	0.0199404	0.00194146	15.1861	0.0220308	0.00154562	15.1859	0.0241876	0.00322517	15.1858	0.0262245	0.00186476	15.185	0.0278944	0.00312327	15.1858	0.029432	0.00196464	15.1861	0.030187	0.00251906	15.1851	0.0318984	0.00264149	15.1853	0.0317672	0.00141459	15.1861	0.0327685	0.0041734	15.1857	0.0339076	0.00333563
15.3435	0.00309698	0.000245487	15.3433	0.00904727	0.00100497	15.3435	0.0146957	0.000934721	15.3433	0.019944	0.00173407	15.3434	0.0220829	0.00158123	15.3432	0.0243256	0.00262471	15.3432	0.0261014	0.00143723	15.3424	0.0279668	0.00365805	15.3431	0.0294108	0.00183009	15.3434	0.0302877	0.00170472	15.3424	0.0319427	0.00216648	15.3427	0.0316953	0.00166832	15.3435	0.0328122	0.00369501	15.3431	0.0335273	0.00248099
15.5008	0.00309704	0.000250751	15.5007	0.0089665	0.000865419	15.5008	0.0147781	0.00098759	15.5007	0.019912	0.00128911	15.5008	0.0220182	0.00117115	15.5006	0.0244878	0.0033653	15.5006	0.0260169	0.000646313	15.4998	0.02791	0.00344941	15.5005	0.0294276	0.00195723	15.5008	0.0303554	0.00275991	15.4998	0.0318473	0.00212425	15.5001	0.0317925	0.00179041	15.5009	0.0328825	0.00309069	15.5004	0.033328	0.00295156
15.6582	0.00308985	0.00023862	15.658	0.00901591	0.000878958	15.6582	0.0146586	0.000748492	15.658	0.0198956	0.00108065	15.6582	0.021946	0.00144696	15.658	0.0244235	0.00262965	15.6579	0.0260129	0.00113582	15.6571	0.0281335	0.00355972	15.6579	0.0293621	0.00259501	15.6582	0.0304242	0.00260339	15.6571	0.0322264	0.00268604	15.6574	0.0320362	0.00259577	15.6582	0.032897	0.00230043	15.6578	0.0336508	0.00300822
15.8156	0.00308914	0.000319043	15.8154	0.00890738	0.000873258	15.8156	0.0147014	0.00103593	15.8154	0.0198018	0.0012012	15.8155	0.0220419	0.00142607	15.8153	0.0243608	0.00204685	15.8153	0.0261852	0.000631131	15.8145	0.0281028	0.00381335	15.8152	0.0292815	0.00222515	15.8155	0.0306699	0.00288808	15.8145	0.03227	0.00218677	15.8148	0.0319723	0.00267925	15.8156	0.0331342	0.00252306	15.8152	0.033631	0.00264041
15.973	0.00308209	0.000249972	15.9728	0.0089113	0.000989435	15.9729	0.014681	0.000934537	15.9728	0.0197579	0.00129238	15.9729	0.0220339	0.00142839	15.9727	0.0243833	0.0019057	15.9726	0.0261812	0.000363448	15.9718	0.0279873	0.00367025	15.9726	0.0293817	0.00224983	15.9729	0.0305997	0.00237505	15.9719	0.0322813	0.0027032	15.9721	0.0319795	0.00220937	15.973	0.0330479	0.00334718	15.9725	0.0337169	0.00278297
16.1303	0.00309594	0.000265269	16.1301	0.00890965	0.000791605	16.1303	0.0147748	0.000898413	16.1301	0.0198833	0.00157028	16.1303	0.0221311	0.00127246	16.1301	0.0244301	0.00245873	16.13	0.0261241	0.000784327	16.1292	0.0278394	0.0034554	16.13	0.0295507	0.00223642	16.1303	0.0304509	0.00207781	16.1292	0.0320369	0.00208301	16.1295	0.0319228	0.00241677	16.1303	0.0329634	0.00344315	16.1299	0.0333889	0.00229907
16.2877	0.0030743	0.000236548	16.2875	0.0089324	0.000655968	16.2877	0.0148018	0.00100906	16.2875	0.0198469	0.0016308	16.2876	0.0222305	0.00164447	16.2874	0.0246125	0.00264289	16.2874	0.0260123	0.000856097	16.2866	0.0278468	0.00368603	16.2873	0.0293748	0.00166046	16.2876	0.0304705	0.00245903	16.2866	0.03202	0.00203042	16.2869	0.0317576	0.00245976	16.2877	0.0329992	0.00344921	16.2873	0.0334211	0.00228087
16.4451	0.00306624	0.000257959	16.4449	0.00892955	0.000470383	16.445	0.0147247	0.00131442	16.4449	0.0197434	0.00151401	16.445	0.0222459	0.00166149	16.4448	0.0245615	0.00258932	16.4447	0.0260428	0.00044858	16.4439	0.0277872	0.00330991	16.4447	0.029371	0.00209903	16.445	0.0305002	0.00232372	16.4439	0.0321478	0.00182907	16.4442	0.0318476	0.00184255	16.4451	0.0329015	0.00314165	16.4446	0.0335708	0.00202071
16.6024	0.00307422	0.000267805	16.6022	0.00892629	0.000476109	16.6024	0.0147167	0.00107445	16.6022	0.0197015	0.00144747	16.6024	0.0220321	0.00123079	16.6022	0.0245474	0.00258147	16.6021	0.0260438	0.000934579	16.6013	0.0277877	0.00308768	16.6021	0.0294357	0.00193517	16.6024	0.0306998	0.00230937	16.6013	0.0321114	0.00204465	16.6016	0.0319437	0.0020927	16.6025	0.0329055	0.0026705	16.602	0.0333852	0.00180303
16.7598	0.00306787	0.000267102	16.7596	0.00884468	0.00043318	16.7598	0.014792	0.00106489	16.7596	0.0196929	0.00147963	16.7597	0.0219716	0.000991691	16.7595	0.0245405	0.00198781	16.7595	0.0260414	0.000757349	16.7586	0.0277195	0.00352289	16.7594	0.0293877	0.00230378	16.7597	0.030832	0.00285082	16.7587	0.0319198	0.00184634	16.7589	0.0321087	0.002789	16.7598	0.0332363	0.00329745	16.7593	0.0335009	0.00244613
16.9172	0.00306265	0.000261127	16.917	0.00884816	0.000361538	16.9171	0.0146898	0.00100819	16.917	0.0197756	0.00149841	16.9171	0.0220373	0.00122758	16.9169	0.0244458	0.00159589	16.9168	0.0261663	0.00088425	16.916	0.0276673	0.00347051	16.9168	0.0296375	0.00207798	16.9171	0.0308473	0.00298856	16.916	0.0319122	0.00193203	16.9163	0.0320732	0.00203287	16.9172	0.0333126	0.00276715	16.9167	0.0336689	0.00306423
17.0745	0.00308048	0.000325417	17.0743	0.00880616	0.000383574	17.0745	0.0147039	0.000994623	17.0743	0.0197081	0.00143498	17.0745	0.0218811	0.00145191	17.0743	0.0243741	0.0019112	17.0742	0.026165	0.00115131	17.0733	0.0275595	0.00298178	17.0742	0.0298233	0.00246855	17.0745	0.0308999	0.00361511	17.0734	0.0317444	0.00237301	17.0737	0.0321736	0.0022989	17.0746	0.0335137	0.00309198	17.0741	0.0336148	0.0030876
17.2319	0.00306062	0.000221546	17.2317	0.00886063	0.000267987	17.2319	0.0146601	0.000831861	17.2317	0.0196664	0.00125105	17.2319	0.0219602	0.00145783	17.2316	0.0243935	0.00197398	17.2316	0.026299	0.00112306	17.2307	0.0275001	0.00324059	17.2315	0.0297791	0.00282791	17.2319	0.0307897	0.00283904	17.2307	0.0318562	0.00274954	17.231	0.032435	0.00227422	17.2319	0.0334822	0.00230729	17.2314	0.0337036	0.00249239
17.3893	0.00308585	0.000194332	17.3891	0.0089045	0.000503207	17.3892	0.0146973	0.000875474	17.3891	0.0196089	0.00118765	17.3892	0.0220617	0.00132147	17.389	0.024586	0.0021434	17.3889	0.0260933	0.00104832	17.3881	0.0277122	0.00335672	17.3889	0.0294519	0.00186144	17.3892	0.0307071	0.00250349	17.3881	0.0319101	0.00242753	17.3884	0.0326127	0.00224715	17.3893	0.0336917	0.00222996	17.3888	0.0336507	0.00273204
17.5466	0.0030836	0.000185822	17.5464	0.00888664	0.0005124	17.5466	0.014723	0.0009323	17.5464	0.0197319	0.00142324	17.5466	0.0220104	0.00143864	17.5464	0.0244147	0.00194706	17.5463	0.0260095	0.000719197	17.5454	0.0277421	0.00341235	17.5463	0.0292984	0.00199209	17.5466	0.030704	0.00226736	17.5454	0.0318391	0.00209616	17.5458	0.0325774	0.00230623	17.5467	0.0334073	0.00256565	17.5462	0.0337169	0.00269396
17.704	0.00306662	0.000219672	17.7038	0.00890502	0.000818726	17.704	0.0146935	0.000885028	17.7038	0.0198071	0.00149334	17.704	0.0220158	0.00149833	17.7037	0.0243327	0.00205393	17.7037	0.0261712	0.000740736	17.7028	0.027673	0.0030246	17.7036	0.0292501	0.00156252	17.704	0.0308462	0.00262178	17.7028	0.0320733	0.00215376	17.7031	0.0327762	0.00225241	17.704	0.0331561	0.00277686	17.7035	0.0335386	0.00185544
17.8614	0.00306995	0.000212428	17.8612	0.00887377	0.000842376	17.8614	0.0146252	0.000786778	17.8612	0.0197681	0.00123434	17.8613	0.0219396	0.00127027	17.8611	0.0245283	0.00251664	17.861	0.0264151	0.0012519	17.8601	0.0276889	0.00304097	17.861	0.0291201	0.0017596	17.8613	0.0308908	0.0022935	17.8602	0.0321867	0.00229199	17.8605	0.0328622	0.00224931	17.8614	0.0334198	0.00268111	17.8609	0.0336397	0.00234038
18.0188	0.00305596	0.000179223	18.0186	0.00890452	0.000694116	18.0187	0.0147488	0.00091348	18.0186	0.0196306	0.000927055	18.0187	0.0219138	0.00132217	18.0185	0.0246372	0.0024456	18.0184	0.0263716	0.000614025	18.0175	0.0278402	0.00300727	18.0183	0.0290783	0.00191721	18.0187	0.0310276	0.00308749	18.0175	0.0321267	0.00247808	18.0178	0.032563	0.00216649	18.0188	0.0334552	0.00301495	18.0183	0.0336778	0.00226337
18.1761	0.00305453	0.000149089	18.1759	0.00894638	0.000760163	18.1761	0.0146859	0.000799154	18.1759	0.0196178	0.00101337	18.1761	0.0220424	0.00179638	18.1758	0.0245996	0.0017123	18.1758	0.0262976	0.0011808	18.1748	0.0280491	0.00349939	18.1757	0.0293661	0.00192141	18.1761	0.0309148	0.00325016	18.1749	0.0318505	0.00191851	18.1752	0.0323936	0.00100184	18.1761	0.0336934	0.00284561	18.1756	0.0337908	0.0023786
18.3335	0.00302071	0.00015539	18.3333	0.00892179	0.000858756	18.3335	0.0147082	0.00104122	18.3333	0.0196273	0.00100086	18.3334	0.0220546	0.0012176	18.3332	0.0246033	0.00141923	18.3331	0.0263604	0.00175641	18.3322	0.028169	0.00364494	18.3331	0.0295188	0.00201199	18.3334	0.0308024	0.00235198	18.3322	0.0319582	0.00213971	18.3326	0.0325671	0.00118409	18.3335	0.0335753	0.00294146	18.333	0.0335221	0.00224625
18.4909	0.00303066	0.000185514	18.4907	0.00893195	0.0007171	18.4908	0.014582	0.000918951	18.4907	0.0197033	0.000796369	18.4908	0.0220288	0.00132306	18.4906	0.0246085	0.00182535	18.4905	0.0263812	0.00160026	18.4896	0.0280674	0.00318977	18.4904	0.0295949	0.00234938	18.4908	0.030813	0.0022775	18.4896	0.0322236	0.00207043	18.4899	0.0325525	0.00181116	18.4909	0.033529	0.00294048	18.4904	0.0336129	0.00226772
18.6482	0.0030462	0.000208571	18.648	0.00890175	0.000727597	18.6482	0.0145638	0.000697811	18.648	0.0196687	0.000901657	18.6482	0.0219372	0.00100993	18.6479	0.0245827	0.00155129	18.6479	0.0264172	0.001803	18.6469	0.0277401	0.00336514	18.6478	0.0294442	0.00170835	18.6482	0.0308704	0.00209806	18.647	0.0323966	0.0015813	18.6473	0.0324581	0.00152081	18.6483	0.0335461	0.00325921	18.6477	0.0334576	0.00286441
18.8056	0.00304786	0.000187738	18.8054	0.00882781	0.000557062	18.8056	0.0145812	0.000823364	18.8054	0.0195475	0.00100415	18.8055	0.0218115	0.0010506	18.8053	0.0244986	0.00201963	18.8052	0.0264357	0.00136688	18.8043	0.0280526	0.00323564	18.8052	0.0294725	0.00200839	18.8055	0.030945	0.0018407	18.8043	0.0321969	0.00140349	18.8046	0.0323437	0.00208549	18.8056	0.0335569	0.00263657	18.8051	0.0332978	0.00234898
18.963	0.00305857	0.000221973	18.9628	0.00881811	0.000622152	18.9629	0.0146109	0.000709073	18.9628	0.0196239	0.00146269	18.9629	0.0217644	0.00104677	18.9627	0.0244829	0.00133532	18.9626	0.02637	0.00142458	18.9616	0.0282228	0.00379281	18.9625	0.0295037	0.00144416	18.9629	0.0310224	0.0026887	18.9617	0.0322592	0.00129875	18.962	0.0323405	0.00229997	18.963	0.0334131	0.00270569	18.9625	0.0333247	0.00258048
19.1203	0.00305572	0.000187694	19.1201	0.00885811	0.00068387	19.1203	0.0145852	0.00075446	19.1201	0.0195658	0.00115899	19.1203	0.0217557	0.000864108	19.12	0.0244007	0.001473	19.12	0.0262754	0.000898639	19.119	0.0280475	0.00360508	19.1199	0.0296162	0.00183633	19.1203	0.0310088	0.00228995	19.119	0.0323353	0.00167557	19.1194	0.0322604	0.00141126	19.1204	0.0334057	0.00286775	19.1198	0.0332452	0.00283135
19.2777	0.00304003	0.000162074	19.2775	0.00895838	0.000604658	19.2777	0.0147144	0.000952318	19.2775	0.0196071	0.000766384	19.2776	0.0217563	0.000862892	19.2774	0.0244829	0.00182645	19.2773	0.0262883	0.000933814	19.2764	0.0279694	0.00353405	19.2773	0.0294113	0.00159553	19.2776	0.0311164	0.0027616	19.2764	0.0319294	0.00132039	19.2767	0.0321236	0.00172488	19.2777	0.0332289	0.00243023	19.2772	0.0330833	0.00270656
19.4351	0.00305339	0.000269492	19.4349	0.00898796	0.000471904	19.435	0.0146789	0.000866887	19.4349	0.0197295	0.00137015	19.435	0.0218288	0.000866116	19.4348	0.0245069	0.00159779	19.4347	0.0263121	0.000848376	19.4337	0.0280991	0.00309074	19.4346	0.029504	0.00129571	19.435	0.0307842	0.00251479	19.4337	0.0319142	0.00122405	19.4341	0.0326598	0.0018707	19.4351	0.0333024	0.00200934	19.4345	0.0331779	0.00242569
19.5924	0.0030467	0.000251584	19.5922	0.00891533	0.000545135	19.5924	0.0146671	0.000690289	19.5922	0.0196717	0.00128428	19.5924	0.0218882	0.000811067	19.5921	0.0243935	0.00112901	19.5921	0.0263091	0.000447739	19.5911	0.0279748	0.00234621	19.592	0.0295965	0.00185079	19.5924	0.0308308	0.0017292	19.5911	0.032181	0.00236541	19.5914	0.0327714	0.00158592	19.5925	0.0332831	0.00208202	19.5919	0.0333018	0.00288265
19.7498	0.00303922	0.000171682	19.7496	0.00887862	0.000618952	19.7498	0.0146071	0.00075171	19.7496	0.0197017	0.00140084	19.7497	0.0219144	0.000694058	19.7495	0.0244389	0.00113774	19.7494	0.0263365	0.000958924	19.7484	0.0280016	0.00274851	19.7494	0.0295134	0.00230492	19.7497	0.0307732	0.00161101	19.7485	0.0320984	0.00157571	19.7488	0.0324509	0.00156794	19.7498	0.0332216	0.00238367	19.7493	0.0333495	0.00335844
19.9072	0.00303676	0.000115703	19.907	0.00887119	0.000459209	19.9071	0.014612	0.000664525	19.907	0.0196484	0.000771709	19.9071	0.021877	0.000554703	19.9069	0.0243967	0.00120057	19.9068	0.0262668	0.00099853	19.9058	0.0279404	0.00277926	19.9067	0.0293982	0.00251867	19.9071	0.0306785	0.00178576	19.9058	0.0319891	0.00116345	19.9062	0.0324136	0.000969999	19.9072	0.0334361	0.00291187	19.9066	0.0334514	0.00359835

## Sheet: T=0.8Tc,W=3.08kTc
y-coordinate, averaged density profile ρf*(y), and uncertainty of the averaged density profile Δρf*(y) of the adsorption isotherm for:
T / Tc = 0.8,
ρs / σf-3 = 1.07, and
Ϛ = 1.0.
The averaged density profiles are indicated with the respective bulk fluid pressure pfb / esf-3.
pfb / esf-3 =	0.00215(6)		pfb / esf-3 =	0.00584(18)		pfb / esf-3 =	0.00855(38)		pfb / esf-3 =	0.01088(35)		pfb / esf-3 =	0.01263(30)		pfb / esf-3 =			pfb / esf-3 =	0.01436(47)		pfb / esf-3 =	0.0178(8)		pfb / esf-3 =	0.0198(13)		pfb / esf-3 =	0.0206(6)		pfb / esf-3 =	0.0223(13)
y / σf	ρf*(y) / σf-3	Δρf*(y) / σf-3	y / σf	ρf*(y) / σf-3	Δρf*(y) / σf-3	y / σf	ρf*(y) / σf-3	Δρf*(y) / σf-3	y / σf	ρf*(y) / σf-3	Δρf*(y) / σf-3	y / σf	ρf*(y) / σf-3	Δρf*(y) / σf-3	y / σf	ρf*(y) / σf-3	Δρf*(y) / σf-3	y / σf	ρf*(y) / σf-3	Δρf*(y) / σf-3	y / σf	ρf*(y) / σf-3	Δρf*(y) / σf-3	y / σf	ρf*(y) / σf-3	Δρf*(y) / σf-3	y / σf	ρf*(y) / σf-3	Δρf*(y) / σf-3	y / σf	ρf*(y) / σf-3	Δρf*(y) / σf-3
4.79975	0.000197519	0.000134568	4.7997	0.000295169	0.00013557	4.79975	0.000260436	0.000137707	4.7997	0.0014809	7.1383e-05	4.79968	0	0	4.79942	0.000621976	6.06948e-05	4.79974	0	0	4.79951	0	0	4.79962	0	0	4.79956	0	0	4.7997	0	0
4.95712	8.49468e-05	5.37494e-05	4.95707	0.000101947	1.73512e-05	4.95712	0.000102141	5.4705e-05	4.95707	0.000577487	7.70447e-05	4.95704	0	0	4.95678	0.000214516	3.81337e-05	4.95711	0	0	4.95687	0	0	4.95699	0	0	4.95692	0	0	4.95707	0	0
5.11449	3.51125e-05	1.5232e-05	5.11444	3.34572e-05	4.03069e-05	5.11448	3.84964e-05	8.44823e-06	5.11444	0.00019132	9.72401e-05	5.11441	0	0	5.11414	7.4262e-05	3.90953e-05	5.11448	0	0	5.11423	0	0	5.11435	0	0	5.11428	0	0	5.11444	0	0
5.27186	1.84057e-05	6.91168e-06	5.2718	1.83076e-05	1.04867e-05	5.27185	1.94791e-05	6.87829e-06	5.2718	0.000102849	3.26293e-05	5.27178	1.15003e-05	2.32578e-06	5.27149	4.18199e-05	2.5904e-05	5.27184	1.55047e-05	3.37324e-06	5.27159	1.84296e-05	6.62831e-06	5.27172	2.06916e-05	3.36234e-06	5.27164	2.12408e-05	2.86542e-06	5.2718	2.19877e-05	4.45968e-06
5.42923	0.00717925	0.000459124	5.42917	0.0273189	0.000653179	5.42922	0.0604991	0.00374099	5.42917	0.0972238	0.0013594	5.42914	0.138533	0.00457916	5.42885	0.163262	0.0125238	5.42921	0.191638	0.00345176	5.42895	0.222564	0.00682008	5.42908	0.237008	0.0150425	5.42901	0.253754	0.0100416	5.42917	0.276424	0.00829434
5.5866	0.0835728	0.00479656	5.58654	0.302793	0.00748434	5.58659	0.627988	0.0325073	5.58654	0.948294	0.0162043	5.58651	1.2765	0.0396678	5.58621	1.45684	0.0905267	5.58658	1.62517	0.0212985	5.58632	1.81715	0.0365651	5.58645	1.88907	0.0969895	5.58637	1.98141	0.069586	5.58654	2.09452	0.0427691
5.74397	0.104991	0.00601899	5.7439	0.359989	0.0072014	5.74396	0.686782	0.0332955	5.7439	0.971605	0.00550442	5.74388	1.21419	0.0277951	5.74357	1.33254	0.0436523	5.74395	1.41656	0.0106535	5.74368	1.48728	0.0141409	5.74381	1.50815	0.00792656	5.74373	1.52852	0.0081423	5.7439	1.53771	0.00692096
5.90134	0.041735	0.00264298	5.90127	0.14039	0.00323825	5.90133	0.257285	0.0121212	5.90127	0.356478	0.00585596	5.90124	0.430014	0.0111016	5.90092	0.465577	0.00963393	5.90132	0.486751	0.0037427	5.90104	0.494354	0.00658246	5.90118	0.49507	0.0173846	5.90109	0.490358	0.0149317	5.90127	0.478107	0.0106704
6.05871	0.0147882	0.00109526	6.05864	0.0509999	0.00146707	6.0587	0.0962016	0.00408509	6.05864	0.138285	0.00415667	6.05861	0.172234	0.00521441	6.05828	0.190715	0.00559524	6.05869	0.205629	0.00231341	6.0584	0.212052	0.00385692	6.05854	0.213988	0.00791389	6.05846	0.212277	0.00832604	6.05864	0.207136	0.00791485
6.21608	0.00745597	0.000552862	6.21601	0.0269696	0.000833963	6.21607	0.0548136	0.00290521	6.21601	0.085747	0.00283284	6.21598	0.116376	0.00527431	6.21564	0.138052	0.00675899	6.21606	0.161426	0.00298373	6.21576	0.182118	0.00353168	6.21591	0.193874	0.00393356	6.21582	0.20259	0.00284041	6.21601	0.211885	0.00390699
6.37344	0.00501458	0.000439274	6.37337	0.0197446	0.000803041	6.37343	0.0462372	0.00325597	6.37337	0.0850013	0.00388826	6.37334	0.14035	0.00950219	6.373	0.191935	0.0205572	6.37342	0.260537	0.00647738	6.37312	0.356837	0.0124677	6.37327	0.411607	0.0352626	6.37318	0.477188	0.0245184	6.37337	0.568657	0.0197049
6.53081	0.00405914	0.000426396	6.53074	0.0178938	0.000742541	6.5308	0.050103	0.00465457	6.53074	0.108647	0.00674336	6.53071	0.209265	0.0164135	6.53036	0.311121	0.0418783	6.53079	0.454405	0.0165718	6.53048	0.66687	0.0317655	6.53064	0.78808	0.0768075	6.53054	0.931251	0.0469691	6.53074	1.12422	0.0364442
6.68818	0.00355498	0.000363462	6.68811	0.0163221	0.000558974	6.68817	0.0467101	0.00460546	6.68811	0.102172	0.00674807	6.68808	0.197126	0.017062	6.68771	0.295338	0.0376636	6.68816	0.432726	0.0149214	6.68784	0.630174	0.0286898	6.688	0.742409	0.047785	6.68791	0.867285	0.0273262	6.68811	1.02247	0.0104829
6.84555	0.00316288	0.000373563	6.84548	0.0133304	0.000388462	6.84554	0.0340746	0.00300443	6.84548	0.0689421	0.00449158	6.84544	0.12599	0.011907	6.84507	0.1849	0.0227946	6.84553	0.271042	0.0107242	6.8452	0.390119	0.0177794	6.84537	0.463266	0.0180479	6.84527	0.539798	0.0087289	6.84548	0.633341	0.00606324
7.00292	0.00285511	0.000341414	7.00284	0.0106045	0.000300042	7.00291	0.0237131	0.00203158	7.00284	0.0439934	0.00295177	7.00281	0.0756837	0.00737124	7.00243	0.110145	0.0124486	7.0029	0.163132	0.00663085	7.00256	0.239688	0.0118014	7.00273	0.291115	0.0109719	7.00263	0.349512	0.00507944	7.00284	0.423662	0.00637967
7.16029	0.00269787	0.00027049	7.16021	0.00905815	0.000232854	7.16028	0.0179445	0.00147224	7.16021	0.031392	0.00238439	7.16018	0.0522085	0.00611932	7.15979	0.0765748	0.00839915	7.16027	0.116302	0.00481265	7.15993	0.182806	0.0103081	7.1601	0.233151	0.0131295	7.15999	0.295952	0.00480205	7.16021	0.396376	0.0041424
7.31766	0.00262153	0.000246672	7.31758	0.00822918	0.000345423	7.31765	0.0151366	0.000878041	7.31758	0.0254392	0.00204649	7.31754	0.0420247	0.00543714	7.31715	0.0634025	0.00820271	7.31764	0.101715	0.00411673	7.31729	0.177546	0.0101206	7.31746	0.243407	0.0229403	7.31736	0.3348	0.00966168	7.31758	0.514446	0.0176761
7.47503	0.0025794	0.000221488	7.47494	0.0077394	0.000469699	7.47502	0.0136928	0.000785264	7.47494	0.0223739	0.00190902	7.47491	0.0367433	0.00491773	7.4745	0.0571819	0.00746594	7.475	0.0969033	0.00389888	7.47465	0.184768	0.0148666	7.47483	0.268644	0.0322885	7.47472	0.394443	0.0150512	7.47494	0.662255	0.0283906
7.6324	0.00254223	0.000248783	7.63231	0.00744539	0.000349847	7.63238	0.0127764	0.000679641	7.63231	0.020287	0.00141092	7.63228	0.0323844	0.00432639	7.63186	0.0501214	0.00705029	7.63237	0.0855687	0.00388056	7.63201	0.167024	0.0142572	7.63219	0.247858	0.028239	7.63208	0.372805	0.0127641	7.63231	0.654435	0.0224922
7.78977	0.00254115	0.000180204	7.78968	0.00726639	0.000296201	7.78975	0.0120125	0.000478678	7.78968	0.0183327	0.00113887	7.78964	0.0276612	0.00345515	7.78922	0.0412069	0.00557549	7.78974	0.0684241	0.0039177	7.78937	0.12945	0.0113991	7.78956	0.192222	0.0185904	7.78944	0.290992	0.012154	7.78968	0.526617	0.0190502
7.94713	0.00252662	0.000209765	7.94705	0.00712907	0.000314137	7.94712	0.0114902	0.000457626	7.94705	0.0167826	0.000985227	7.94701	0.0239149	0.00259849	7.94658	0.0339279	0.0040615	7.94711	0.0534922	0.00299554	7.94673	0.0964176	0.0073959	7.94692	0.143244	0.0105043	7.94681	0.218103	0.0102405	7.94705	0.4172	0.0144889
8.1045	0.00252636	0.000250948	8.10441	0.00709909	0.000213316	8.10449	0.0111571	0.000686853	8.10441	0.0157055	0.000870326	8.10437	0.0214331	0.00237971	8.10394	0.0288248	0.00334637	8.10448	0.043728	0.00244469	8.10409	0.0759265	0.00540345	8.10428	0.113264	0.00644779	8.10417	0.175734	0.0109846	8.10441	0.36759	0.0167985
8.26187	0.00250841	0.000242205	8.26178	0.00704523	0.00024366	8.26186	0.0109056	0.000304008	8.26178	0.0150125	0.00103142	8.26174	0.0196443	0.00243649	8.2613	0.0257079	0.00269572	8.26185	0.037613	0.00218799	8.26145	0.0637917	0.00357761	8.26165	0.0961029	0.00736686	8.26153	0.154833	0.0119154	8.26178	0.365192	0.0206028
8.41924	0.00250002	0.000269852	8.41915	0.00701027	0.000295352	8.41923	0.0107499	0.000244422	8.41915	0.0145798	0.00076007	8.41911	0.018603	0.00204923	8.41865	0.0237799	0.00261499	8.41921	0.0337462	0.00191298	8.41881	0.0560346	0.0025369	8.41901	0.0854323	0.0064631	8.41889	0.141974	0.0131166	8.41915	0.372131	0.0241911
8.57661	0.0024875	0.000280247	8.57652	0.00696947	0.000373974	8.5766	0.0107077	0.000325708	8.57652	0.0143683	0.00099759	8.57647	0.0178485	0.00188901	8.57601	0.0221767	0.00228753	8.57658	0.0311818	0.00121759	8.57617	0.0494445	0.00193069	8.57638	0.0744584	0.00537287	8.57626	0.124637	0.0147796	8.57652	0.34904	0.0249419
8.73398	0.00249392	0.000259586	8.73388	0.00701801	0.000368216	8.73397	0.0107315	0.000229961	8.73388	0.0142219	0.000930835	8.73384	0.0174281	0.00187687	8.73337	0.0212696	0.00161961	8.73395	0.0287194	0.00117509	8.73354	0.0431413	0.00285722	8.73374	0.063567	0.00426269	8.73362	0.1044	0.0133028	8.73388	0.301172	0.0238341
8.89135	0.00250332	0.000268419	8.89125	0.00699712	0.000495802	8.89133	0.0106546	0.000261307	8.89125	0.0140544	0.000671275	8.89121	0.017266	0.00184626	8.89073	0.0204505	0.00175935	8.89132	0.0268797	0.0010719	8.8909	0.0380393	0.00221688	8.89111	0.0540683	0.00344075	8.89098	0.0856395	0.0122556	8.89125	0.251071	0.0200398
9.04872	0.0025025	0.000257997	9.04862	0.00697424	0.000476153	9.0487	0.0105765	0.00034917	9.04862	0.0138737	0.000827045	9.04857	0.0168808	0.00158534	9.04809	0.0199232	0.00146274	9.04869	0.0254095	0.000914724	9.04826	0.0345231	0.00211453	9.04847	0.0470316	0.00325348	9.04834	0.0718954	0.0102922	9.04862	0.214054	0.0179831
9.20609	0.00249366	0.000288716	9.20598	0.00697972	0.000645925	9.20607	0.0105925	0.000279776	9.20598	0.013777	0.000559417	9.20594	0.0168088	0.000973135	9.20544	0.0195439	0.00133671	9.20606	0.0246092	0.00135982	9.20562	0.0320065	0.00119176	9.20584	0.0423304	0.00364987	9.20571	0.0623432	0.00897848	9.20598	0.189727	0.0212097
9.36346	0.00250701	0.000217776	9.36335	0.0069745	0.000719347	9.36344	0.0105673	0.000203039	9.36335	0.01379	0.00095532	9.36331	0.0167465	0.00131211	9.3628	0.019303	0.00097215	9.36343	0.0240409	0.000945497	9.36298	0.0301617	0.00130194	9.3632	0.0388123	0.00354674	9.36307	0.0556023	0.00783358	9.36335	0.170576	0.0192656
9.52082	0.00251944	0.00021486	9.52072	0.00702094	0.000629615	9.52081	0.0105624	0.000172252	9.52072	0.0138587	0.00107288	9.52067	0.0165541	0.00118916	9.52016	0.0189235	0.00114088	9.52079	0.02351	0.00115041	9.52034	0.0289147	0.000685056	9.52057	0.0358085	0.00367921	9.52043	0.049881	0.00717413	9.52072	0.150679	0.0177872
9.67819	0.00251573	0.000231826	9.67809	0.00700619	0.000524846	9.67818	0.0105782	0.000528789	9.67809	0.0136705	0.0010495	9.67804	0.0165116	0.00115773	9.67752	0.0188862	0.00125783	9.67816	0.0230732	0.00147537	9.6777	0.0279175	0.000852981	9.67793	0.0338863	0.00356803	9.67779	0.0450549	0.00769442	9.67809	0.129503	0.0177256
9.83556	0.00252179	0.000217954	9.83545	0.00701571	0.000491166	9.83555	0.0106119	0.000378962	9.83545	0.0137245	0.00118038	9.83541	0.0164184	0.00144967	9.83488	0.0188774	0.00135129	9.83553	0.0229508	0.00116816	9.83506	0.0268651	0.000970105	9.8353	0.0320461	0.00343396	9.83516	0.0413375	0.00648978	9.83545	0.110065	0.0161772
9.99293	0.00249837	0.00024394	9.99282	0.00704699	0.00046439	9.99292	0.0104901	0.00029506	9.99282	0.0138018	0.00093027	9.99277	0.0164338	0.00104676	9.99223	0.0187971	0.0015033	9.9929	0.0227884	0.00129912	9.99242	0.0261982	0.000599139	9.99266	0.0308165	0.00373425	9.99252	0.0382776	0.00556704	9.99282	0.094614	0.0133306
10.1503	0.00249289	0.000203924	10.1502	0.00700177	0.000499068	10.1503	0.0105018	0.000458204	10.1502	0.013717	0.00108502	10.1501	0.0163035	0.00113012	10.1496	0.0187952	0.00131659	10.1503	0.0226566	0.00129982	10.1498	0.0258945	0.00100746	10.15	0.0300112	0.00371199	10.1499	0.0363223	0.00469157	10.1502	0.0821096	0.0114722
10.3077	0.00250787	7.99951e-05	10.3076	0.00699182	0.000428268	10.3077	0.0105795	0.000253751	10.3076	0.0136954	0.000999758	10.3075	0.0164073	0.00124911	10.3069	0.0189454	0.00121921	10.3076	0.0224589	0.00128896	10.3071	0.0252919	0.00120523	10.3074	0.0292304	0.00356809	10.3072	0.0346327	0.00474641	10.3076	0.0729257	0.0108703
10.465	0.00250538	9.16971e-05	10.4649	0.00702275	0.000382662	10.465	0.0106583	0.000164135	10.4649	0.0137331	0.00119105	10.4649	0.0163405	0.00157971	10.4643	0.0188961	0.00071712	10.465	0.0223743	0.00129927	10.4645	0.0249219	0.000662306	10.4648	0.0287494	0.00362249	10.4646	0.0334054	0.00452698	10.4649	0.0653068	0.00850533
10.6224	0.00251547	0.000119612	10.6223	0.00702493	0.000459283	10.6224	0.010596	0.000437921	10.6223	0.0137479	0.00118085	10.6222	0.0164196	0.00119213	10.6217	0.0188365	0.00102798	10.6224	0.0223158	0.000688815	10.6219	0.0247038	0.00126458	10.6221	0.0281074	0.00321702	10.622	0.0325654	0.00396916	10.6223	0.0584331	0.00732721
10.7798	0.00250816	9.8587e-05	10.7797	0.00709073	0.000389279	10.7798	0.0106365	0.000426327	10.7797	0.0136358	0.00127757	10.7796	0.0164245	0.00117464	10.779	0.018738	0.00163196	10.7797	0.0225707	0.00091198	10.7792	0.0248578	0.00139399	10.7795	0.0278354	0.00375048	10.7793	0.0315944	0.00313878	10.7797	0.0527563	0.00592045
10.9371	0.00251676	6.62609e-05	10.937	0.00709803	0.00026992	10.9371	0.010665	0.00013027	10.937	0.0137677	0.000839459	10.937	0.016511	0.00113867	10.9364	0.0187814	0.00141136	10.9371	0.0222909	0.000664359	10.9366	0.0249102	0.00133136	10.9369	0.0275581	0.00294619	10.9367	0.0310941	0.0034593	10.937	0.0479549	0.00565471
11.0945	0.00252956	8.16032e-05	11.0944	0.00704606	0.000184912	11.0945	0.0107083	0.000258485	11.0944	0.0136909	0.000928003	11.0943	0.0165053	0.000944792	11.0937	0.0187635	0.000976359	11.0945	0.0223735	0.000438345	11.094	0.0250118	0.00183614	11.0942	0.0276794	0.00286671	11.0941	0.0306845	0.00245608	11.0944	0.0441666	0.0051697
11.2519	0.00253416	4.92226e-05	11.2518	0.00707478	0.000402796	11.2519	0.0106066	0.000547154	11.2518	0.0136944	0.000968209	11.2517	0.0164626	0.00123354	11.2511	0.0188905	0.00109513	11.2518	0.0223392	0.000788057	11.2513	0.0246544	0.00182225	11.2516	0.0273991	0.0029046	11.2514	0.0302544	0.00260866	11.2518	0.0417633	0.00393253
11.4093	0.00252287	0.000136625	11.4091	0.00708551	0.000404126	11.4092	0.0105746	0.000364719	11.4091	0.0136989	0.000886143	11.4091	0.0164541	0.000927382	11.4085	0.0189206	0.00151389	11.4092	0.0221592	0.000483525	11.4087	0.0246605	0.00164215	11.4089	0.0272701	0.00285788	11.4088	0.0299206	0.00256849	11.4091	0.0397544	0.00384108
11.5666	0.00252521	8.78009e-05	11.5665	0.00707407	0.000456242	11.5666	0.0106969	0.000250207	11.5665	0.0136888	0.00109016	11.5664	0.0164604	0.000937939	11.5658	0.0188385	0.00123503	11.5666	0.0221758	0.000810957	11.566	0.0246837	0.00159452	11.5663	0.0273929	0.00268589	11.5661	0.0298	0.00230393	11.5665	0.0379984	0.00352324
11.724	0.00252855	8.71599e-05	11.7239	0.0070291	0.000315034	11.724	0.0106318	0.000117777	11.7239	0.0137283	0.00090051	11.7238	0.0164647	0.000922317	11.7232	0.0186818	0.00163694	11.724	0.0220119	0.000723095	11.7234	0.0247257	0.00141018	11.7237	0.0273124	0.00317008	11.7235	0.0298272	0.00316375	11.7239	0.0365777	0.00328421
11.8814	0.00252566	9.02026e-05	11.8812	0.00702064	0.000488915	11.8813	0.0106326	0.000219161	11.8812	0.0137235	0.000979514	11.8812	0.0163544	0.00106132	11.8805	0.0187072	0.00163277	11.8813	0.0220558	0.000836749	11.8808	0.0246502	0.00132321	11.881	0.0273539	0.00309582	11.8809	0.0297063	0.00366428	11.8812	0.0355404	0.00290446
12.0387	0.0025285	0.00012478	12.0386	0.00697082	0.000382177	12.0387	0.0106258	0.000370566	12.0386	0.0137169	0.00140313	12.0385	0.0163455	0.000803073	12.0379	0.0187276	0.00189724	12.0387	0.0219387	0.00133367	12.0381	0.0246799	0.0016057	12.0384	0.0271979	0.00231836	12.0382	0.0296258	0.0036989	12.0386	0.0350214	0.00339564
12.1961	0.00252445	0.000176439	12.196	0.00700949	0.000251844	12.1961	0.0105358	0.000309225	12.196	0.0137282	0.001173	12.1959	0.0163955	0.00104269	12.1952	0.0188398	0.00195428	12.1961	0.021973	0.00162474	12.1955	0.024634	0.00116491	12.1958	0.0272661	0.00262733	12.1956	0.0296041	0.00334206	12.196	0.0343783	0.0033426
12.3535	0.00252896	0.000151176	12.3533	0.00701814	0.000401826	12.3534	0.0105717	0.00029599	12.3533	0.0137406	0.00126426	12.3533	0.0164258	0.000887697	12.3526	0.0190612	0.00205519	12.3534	0.0222927	0.00153934	12.3528	0.0245831	0.00113854	12.3531	0.0271174	0.00269299	12.353	0.0295989	0.00300635	12.3533	0.0337251	0.0043094
12.5108	0.00252298	8.34441e-05	12.5107	0.00702632	0.000362354	12.5108	0.010548	0.000288848	12.5107	0.0136465	0.00126795	12.5106	0.0162636	0.00135613	12.51	0.0190245	0.00181651	12.5108	0.0222236	0.00174373	12.5102	0.0244908	0.00107174	12.5105	0.0269146	0.0025468	12.5103	0.0294928	0.00237728	12.5107	0.0333543	0.0038517
12.6682	0.00251828	0.00011239	12.6681	0.00700191	0.000548095	12.6682	0.0105527	0.000232063	12.6681	0.0136473	0.000973653	12.668	0.016461	0.00103947	12.6673	0.0189256	0.00150358	12.6682	0.0220443	0.00220491	12.6676	0.0246947	0.000926977	12.6679	0.0269487	0.00264181	12.6677	0.0297722	0.00194018	12.6681	0.0331104	0.00379708
12.8256	0.00251464	0.000120811	12.8254	0.00698127	0.000592497	12.8256	0.0105378	0.000395475	12.8254	0.0137289	0.00108844	12.8254	0.0164644	0.00128496	12.8247	0.0188241	0.0015898	12.8255	0.0222222	0.0015877	12.8249	0.0247399	0.000604557	12.8252	0.0269671	0.00280992	12.825	0.0295394	0.00279541	12.8254	0.0329845	0.00374666
12.9829	0.00254455	7.71194e-05	12.9828	0.0069909	0.000495572	12.9829	0.0106298	0.000464554	12.9828	0.0137169	0.000971959	12.9827	0.0163636	0.00117365	12.982	0.0188261	0.00128858	12.9829	0.0223428	0.00159074	12.9823	0.0244827	0.000601051	12.9826	0.0269143	0.00333485	12.9824	0.0294327	0.00336596	12.9828	0.0330377	0.00296124
13.1403	0.00253054	9.00824e-05	13.1402	0.0069839	0.00044569	13.1403	0.0106147	0.000253619	13.1402	0.0137487	0.000852303	13.1401	0.0163867	0.00119951	13.1394	0.0189206	0.00147562	13.1403	0.0222592	0.00183706	13.1396	0.0246372	0.000506391	13.14	0.0268145	0.00336327	13.1398	0.0293869	0.0037938	13.1402	0.032817	0.00302456
13.2977	0.00252729	0.000159738	13.2975	0.00703865	0.000504603	13.2977	0.0106909	0.000463348	13.2975	0.0137788	0.000855597	13.2975	0.0163386	0.000917765	13.2968	0.01913	0.00182731	13.2976	0.0222933	0.00175289	13.297	0.024696	0.000344396	13.2973	0.0269203	0.00304988	13.2971	0.0294943	0.00356876	13.2975	0.03277	0.00255738
13.455	0.00252988	0.000130644	13.4549	0.00700439	0.000504293	13.455	0.0105959	0.000525009	13.4549	0.0137609	0.000930659	13.4548	0.0164607	0.00108498	13.4541	0.0192234	0.00202828	13.455	0.0224544	0.00159537	13.4544	0.0247608	0.000826568	13.4547	0.0269515	0.00313795	13.4545	0.0296137	0.00264201	13.4549	0.0328503	0.00275336
13.6124	0.0025376	0.000176922	13.6123	0.00700457	0.000496055	13.6124	0.0106475	0.000543549	13.6123	0.0137351	0.000932087	13.6122	0.0163956	0.000946192	13.6115	0.0190621	0.0018931	13.6124	0.0224282	0.00120239	13.6117	0.0245918	0.000691494	13.6121	0.0268235	0.00314949	13.6119	0.0295491	0.00314292	13.6123	0.0324443	0.00285443
13.7698	0.00252901	0.000134572	13.7696	0.00702916	0.000395337	13.7698	0.0106793	0.000359608	13.7696	0.0135914	0.00101404	13.7696	0.0164464	0.000818917	13.7688	0.0189983	0.00220289	13.7697	0.0224852	0.00129556	13.7691	0.0245823	0.00105784	13.7694	0.0268051	0.00287114	13.7692	0.0293822	0.00292815	13.7696	0.0322918	0.00340255
13.9272	0.00253793	0.000103688	13.927	0.00706151	0.000280423	13.9271	0.0107254	0.000451757	13.927	0.0137096	0.00113765	13.9269	0.016418	0.000938301	13.9262	0.0189309	0.00224156	13.9271	0.0223383	0.00102532	13.9264	0.024496	0.000346795	13.9268	0.0267642	0.00263775	13.9266	0.0295028	0.00257953	13.927	0.0324563	0.00389244
14.0845	0.00254809	0.000133316	14.0844	0.00705438	0.000350413	14.0845	0.0106338	0.000668188	14.0844	0.0137706	0.0010696	14.0843	0.0164119	0.000780833	14.0835	0.0188399	0.00214671	14.0845	0.0224512	0.00124403	14.0838	0.0246058	0.000627572	14.0841	0.0269513	0.00325808	14.0839	0.0295864	0.00220164	14.0844	0.0325848	0.00382236
14.2419	0.00255659	9.95191e-05	14.2417	0.00707665	0.000299591	14.2419	0.0107302	0.000545039	14.2417	0.0137336	0.00119151	14.2417	0.0164564	0.000733463	14.2409	0.0189154	0.00157901	14.2418	0.0225734	0.00144836	14.2412	0.0246915	0.00131709	14.2415	0.0266542	0.00284915	14.2413	0.029568	0.00190547	14.2417	0.0325293	0.00369716
14.3993	0.00254194	0.000129266	14.3991	0.00704969	0.000310506	14.3992	0.0107091	0.000470788	14.3991	0.0137527	0.00100483	14.399	0.0166359	0.00116369	14.3983	0.0189585	0.00196046	14.3992	0.0225939	0.00207764	14.3985	0.0246929	0.000783672	14.3989	0.0266215	0.00289024	14.3987	0.0297145	0.00192586	14.3991	0.0325641	0.00362255
14.5566	0.00254664	0.000169312	14.5565	0.00704358	0.000246884	14.5566	0.0107289	0.000433346	14.5565	0.0137376	0.00100411	14.5564	0.0165823	0.000997292	14.5556	0.0191079	0.00238162	14.5566	0.0225972	0.00171872	14.5559	0.0244923	0.00122058	14.5562	0.0265655	0.0033224	14.556	0.0298602	0.00240355	14.5565	0.032448	0.00272481
14.714	0.00255984	0.000113499	14.7138	0.00704076	0.000210855	14.714	0.0107962	0.000614234	14.7138	0.0137197	0.00120748	14.7138	0.0167045	0.00140557	14.713	0.019095	0.00202413	14.714	0.0225392	0.00174191	14.7133	0.0245842	0.0010997	14.7136	0.0267438	0.00292857	14.7134	0.0294876	0.00301604	14.7138	0.0326705	0.00292784
14.8714	0.00252697	0.000194309	14.8712	0.00704459	0.00034827	14.8713	0.0107215	0.000593183	14.8712	0.0136389	0.00126222	14.8711	0.0165381	0.000911316	14.8703	0.0189519	0.00188964	14.8713	0.0225253	0.00163868	14.8706	0.0247309	0.00117701	14.871	0.0268631	0.00271299	14.8708	0.0293589	0.00274471	14.8712	0.0329592	0.00232181
15.0287	0.00255432	0.000111929	15.0286	0.00700353	0.000366613	15.0287	0.0106598	0.000478412	15.0286	0.0137598	0.00123195	15.0285	0.0167487	0.000763128	15.0277	0.0187948	0.00187922	15.0287	0.0226529	0.00134785	15.028	0.0247007	0.00145573	15.0283	0.0268081	0.00226196	15.0281	0.0295897	0.00263878	15.0286	0.0329049	0.00297086
15.1861	0.00254835	0.000127012	15.1859	0.00700101	0.000265367	15.1861	0.0107005	0.000603093	15.1859	0.0137158	0.00132503	15.1859	0.0164333	0.000672091	15.185	0.0189384	0.002097	15.1861	0.0226969	0.0012086	15.1853	0.0249389	0.00158691	15.1857	0.0269154	0.00247532	15.1855	0.0295942	0.00272901	15.1859	0.032771	0.00300729
15.3435	0.00254716	0.000162253	15.3433	0.00698462	0.000198374	15.3435	0.0107459	0.000526809	15.3433	0.0137116	0.00149642	15.3432	0.0166174	0.000964463	15.3424	0.0189885	0.00198674	15.3434	0.0226165	0.00161087	15.3427	0.0247652	0.00140646	15.3431	0.0268054	0.00248767	15.3428	0.0297753	0.00270727	15.3433	0.0329001	0.00209973
15.5008	0.00253375	0.000145897	15.5007	0.00694591	0.000155486	15.5008	0.0106737	0.00027144	15.5007	0.0136425	0.0012326	15.5006	0.0165437	0.000914533	15.4998	0.0188879	0.00181155	15.5008	0.022562	0.00181285	15.5001	0.0249066	0.0015894	15.5004	0.0267233	0.00260047	15.5002	0.0296904	0.00301045	15.5007	0.0326386	0.00278185
15.6582	0.0025324	0.000152065	15.658	0.00701692	0.000189546	15.6582	0.0106958	0.000499773	15.658	0.0135726	0.00131024	15.658	0.0165358	0.000648459	15.6571	0.0188168	0.00173712	15.6582	0.0223571	0.00217665	15.6574	0.0251031	0.00139133	15.6578	0.0267449	0.00244736	15.6576	0.0293923	0.00282043	15.658	0.0327653	0.00252755
15.8156	0.00252843	0.00018137	15.8154	0.0070072	0.000369833	15.8156	0.0106519	0.000352908	15.8154	0.0135877	0.00130852	15.8153	0.0164131	0.001016	15.8145	0.018754	0.00153583	15.8155	0.0224797	0.00184692	15.8148	0.0248303	0.00115442	15.8152	0.0266573	0.00291994	15.8149	0.0292732	0.00278756	15.8154	0.0326737	0.00288889
15.973	0.0025407	0.000143557	15.9728	0.0069867	0.000291815	15.9729	0.010614	0.000305346	15.9728	0.0135116	0.001429	15.9727	0.0163406	0.000805857	15.9718	0.0188224	0.00166502	15.9729	0.0223776	0.00187961	15.9721	0.0247941	0.00117315	15.9725	0.0269117	0.0029792	15.9723	0.0291795	0.00289173	15.9728	0.0325364	0.00287206
16.1303	0.00254117	0.000176536	16.1301	0.00699989	0.000338987	16.1303	0.0106309	0.000350356	16.1301	0.0134924	0.00143651	16.1301	0.0163707	0.000912893	16.1292	0.0187249	0.00189574	16.1303	0.0223859	0.00178384	16.1295	0.0248565	0.00076358	16.1299	0.0268715	0.00332492	16.1297	0.0291586	0.00274362	16.1301	0.0324315	0.00262024
16.2877	0.00255701	0.000191339	16.2875	0.00701268	0.000340347	16.2877	0.0107331	0.000314804	16.2875	0.0135557	0.00139401	16.2874	0.0163866	0.00094487	16.2866	0.0188445	0.00189779	16.2876	0.022502	0.0018767	16.2869	0.0250378	0.00122448	16.2873	0.0267608	0.00319222	16.287	0.0291583	0.0027356	16.2875	0.0323736	0.00270926
16.4451	0.00256301	0.000129604	16.4449	0.00702484	0.000226358	16.445	0.0107428	0.000300355	16.4449	0.0135261	0.00153459	16.4448	0.0163757	0.000800049	16.4439	0.0188803	0.00158417	16.445	0.0224561	0.0018748	16.4442	0.0248335	0.00101071	16.4446	0.0267536	0.00319465	16.4444	0.0291911	0.00263963	16.4449	0.032402	0.00287568
16.6024	0.00254712	0.000131497	16.6022	0.00700306	0.000262298	16.6024	0.0107485	0.000311656	16.6022	0.0135807	0.00138495	16.6022	0.0163659	0.000973286	16.6013	0.0190374	0.00195053	16.6024	0.0224094	0.00129186	16.6016	0.0247634	0.00147248	16.602	0.0267987	0.00233827	16.6017	0.0289264	0.00309762	16.6022	0.0324982	0.00276797
16.7598	0.00254538	0.000106638	16.7596	0.0069949	0.000275979	16.7598	0.0106293	0.00027665	16.7596	0.0136032	0.00132944	16.7595	0.0163056	0.00111946	16.7586	0.0189639	0.00206568	16.7597	0.0224133	0.00177465	16.7589	0.0247361	0.00119276	16.7593	0.0269483	0.00264168	16.7591	0.0289704	0.00285572	16.7596	0.032602	0.00295653
16.9172	0.00255699	0.000142459	16.917	0.00700625	0.000305837	16.9171	0.0106544	0.000322922	16.917	0.013732	0.00115682	16.9169	0.016326	0.00109912	16.916	0.0190211	0.00210394	16.9171	0.0223343	0.00185922	16.9163	0.0247823	0.00118027	16.9167	0.0271408	0.00334734	16.9165	0.0290468	0.0022877	16.917	0.0325602	0.00317258
17.0745	0.00255013	0.000117776	17.0743	0.00704465	0.00023232	17.0745	0.010722	0.000547473	17.0743	0.0137204	0.000983376	17.0743	0.0163914	0.000896507	17.0733	0.0191029	0.0016398	17.0745	0.0224729	0.0019363	17.0737	0.0246782	0.00141692	17.0741	0.0268017	0.00345282	17.0738	0.0293306	0.00207646	17.0743	0.0325743	0.00209387
17.2319	0.00255571	0.000167816	17.2317	0.00706811	0.000260196	17.2319	0.0106808	0.000496577	17.2317	0.0136579	0.00109437	17.2316	0.0163655	0.00089381	17.2307	0.0191187	0.00174377	17.2319	0.0225063	0.00183301	17.231	0.0246725	0.000811134	17.2314	0.0268683	0.00399673	17.2312	0.0293887	0.001553	17.2317	0.0326139	0.00247951
17.3893	0.00255065	9.24865e-05	17.3891	0.00708197	0.000314111	17.3892	0.0106398	0.000404691	17.3891	0.0136264	0.00101779	17.389	0.0163055	0.00100767	17.3881	0.0192104	0.00230242	17.3892	0.0222695	0.00179902	17.3884	0.024719	0.00142329	17.3888	0.026878	0.00348357	17.3886	0.0291792	0.00210075	17.3891	0.0326964	0.00190324
17.5466	0.00256417	6.74039e-05	17.5464	0.00704823	0.000178424	17.5466	0.0107	0.00039034	17.5464	0.0136653	0.00101012	17.5464	0.0163902	0.00121371	17.5454	0.0191377	0.00223026	17.5466	0.0223754	0.0022333	17.5458	0.0249425	0.00166065	17.5462	0.0267922	0.00394667	17.5459	0.0291987	0.00202551	17.5464	0.0326424	0.00226291
17.704	0.00256703	7.94026e-05	17.7038	0.00704805	0.00024552	17.704	0.010647	0.000725484	17.7038	0.013579	0.000967233	17.7037	0.0163379	0.00128309	17.7028	0.0192289	0.00237226	17.704	0.022284	0.00207054	17.7031	0.0249554	0.00203333	17.7035	0.0266439	0.0037425	17.7033	0.0292976	0.00158978	17.7038	0.0325818	0.0028199
17.8614	0.00257669	0.000133875	17.8612	0.00708229	0.000181228	17.8614	0.0107247	0.000840683	17.8612	0.0136329	0.000984282	17.8611	0.0162194	0.00087608	17.8601	0.0189948	0.00233361	17.8613	0.022287	0.00203966	17.8605	0.0248389	0.00144897	17.8609	0.0265488	0.00371199	17.8606	0.0293602	0.00157749	17.8612	0.0327003	0.00265971
18.0188	0.00255529	0.000118217	18.0186	0.00710389	0.000228326	18.0187	0.0107332	0.000747473	18.0186	0.013806	0.00076433	18.0185	0.0162383	0.000937571	18.0175	0.0190745	0.00249552	18.0187	0.0224217	0.0019193	18.0178	0.0247056	0.0010444	18.0183	0.0265932	0.00326338	18.018	0.0289085	0.0023061	18.0186	0.032715	0.00257269
18.1761	0.00255081	0.000104956	18.1759	0.0070777	0.000232122	18.1761	0.010715	0.00060121	18.1759	0.0137115	0.000493721	18.1758	0.0164008	0.00110091	18.1748	0.0189937	0.00224535	18.1761	0.0223414	0.002113	18.1752	0.0244503	0.000779948	18.1756	0.0266507	0.00344219	18.1754	0.0291276	0.00235952	18.1759	0.0327868	0.00355356
18.3335	0.00256237	8.80812e-05	18.3333	0.00711213	0.000295007	18.3335	0.0107299	0.000584446	18.3333	0.0136925	0.000702664	18.3332	0.0162686	0.000868216	18.3322	0.0191069	0.00219949	18.3334	0.022362	0.00181929	18.3326	0.0244628	0.00123435	18.333	0.0267435	0.00313594	18.3327	0.0291503	0.00194599	18.3333	0.0329374	0.00285275
18.4909	0.00258098	6.00963e-05	18.4907	0.00711882	0.000301477	18.4908	0.0106771	0.000701293	18.4907	0.0137247	0.000231675	18.4906	0.0163785	0.000946374	18.4896	0.0191272	0.00221094	18.4908	0.0224741	0.00223083	18.4899	0.0244827	0.00153553	18.4904	0.0264299	0.00303622	18.4901	0.0293201	0.00197896	18.4907	0.0326735	0.00324387
18.6482	0.00259004	7.79626e-05	18.648	0.00713754	0.000348317	18.6482	0.0106699	0.000414097	18.648	0.0138088	0.000373262	18.6479	0.0163033	0.000849358	18.6469	0.0190405	0.00202477	18.6482	0.0224494	0.00176382	18.6473	0.0247488	0.00158094	18.6477	0.0266424	0.00285495	18.6475	0.029028	0.00191605	18.648	0.0326085	0.00269753
18.8056	0.00256123	0.000110843	18.8054	0.00710221	0.000200618	18.8056	0.0106832	0.000390353	18.8054	0.0137587	0.000375662	18.8053	0.01623	0.000768505	18.8043	0.0190581	0.00201429	18.8055	0.0223691	0.00195084	18.8046	0.0244399	0.000794364	18.8051	0.0266503	0.00276015	18.8048	0.029189	0.00144161	18.8054	0.0328157	0.00269904
18.963	0.00257126	0.000131765	18.9628	0.00711992	0.00022074	18.9629	0.0106359	0.000350804	18.9628	0.0136944	0.000561745	18.9627	0.0163761	0.000747845	18.9616	0.0191535	0.00201839	18.9629	0.0223511	0.00184615	18.962	0.0243132	0.000898582	18.9625	0.0268331	0.0026175	18.9622	0.0291774	0.00150055	18.9628	0.0324985	0.00243656
19.1203	0.00257111	9.88447e-05	19.1201	0.00708005	0.000209834	19.1203	0.0106274	0.000550581	19.1201	0.0136917	0.000812701	19.12	0.016565	0.000895976	19.119	0.0192283	0.00188388	19.1203	0.0222964	0.00138051	19.1194	0.024375	0.000812676	19.1198	0.0266857	0.00279524	19.1195	0.0292816	0.00149735	19.1201	0.0326053	0.00271067
19.2777	0.00256197	5.38422e-05	19.2775	0.00708284	0.000389781	19.2777	0.0106203	0.000395715	19.2775	0.0138803	0.000754099	19.2774	0.0164267	0.000695145	19.2764	0.0192048	0.00183874	19.2776	0.0222199	0.00150709	19.2767	0.0243309	0.00087921	19.2772	0.0268365	0.0019495	19.2769	0.0292354	0.00157737	19.2775	0.0321993	0.00277999
19.4351	0.0025721	5.27248e-05	19.4349	0.00709881	0.000151227	19.435	0.0105633	0.000211941	19.4349	0.0137434	0.000453873	19.4348	0.0165016	0.000851966	19.4337	0.0192291	0.00220038	19.435	0.022373	0.001965	19.4341	0.0243423	0.00150041	19.4345	0.0268681	0.00141295	19.4343	0.0290722	0.00173251	19.4349	0.0324882	0.00228364
19.5924	0.00258272	5.44344e-05	19.5922	0.00711117	0.000119934	19.5924	0.0105694	0.000195502	19.5922	0.0138919	0.000487302	19.5921	0.0164035	0.000672367	19.5911	0.0192066	0.00248847	19.5924	0.022275	0.00141788	19.5914	0.024295	0.00129934	19.5919	0.0269298	0.00215274	19.5916	0.0289093	0.0015712	19.5922	0.032494	0.00274255
19.7498	0.00257627	8.02661e-05	19.7496	0.00708905	0.000242905	19.7498	0.0105918	0.000179781	19.7496	0.013801	0.000738534	19.7495	0.0162399	0.000713617	19.7484	0.0192729	0.00251333	19.7497	0.0222428	0.00153637	19.7488	0.0241348	0.000985318	19.7493	0.0267968	0.0029985	19.749	0.028931	0.00136943	19.7496	0.0324184	0.00270358
19.9072	0.00259344	9.00198e-05	19.907	0.00706692	0.000212827	19.9071	0.010626	0.000152408	19.907	0.013731	0.00101083	19.9069	0.0162802	0.00036273	19.9058	0.0191942	0.00235579	19.9071	0.0221262	0.00152336	19.9062	0.024333	0.0011859	19.9066	0.0267939	0.00314165	19.9064	0.0289168	0.00145424	19.907	0.0324072	0.00273283

[truncated: 39 more sheets: T=0.8Tc,W=4.62kTc, T=0.8Tc,W=6.16kTc, T=0.8Tc,W=1.69kTc, T=0.8Tc,W=2.48kTc, T=0.8Tc,W=3.14kTc, T=0.8Tc,W=2.83kTc, T=0.8Tc,W=4.15kTc, T=0.8Tc,W=5.25kTc, T=0.9Tc,W=1.08kTc, T=0.9Tc,W=1.58kTc, T=0.9Tc,W=2.00kTc, T=0.9Tc,W=2.31kTc, T=1.1Tc,W=1.08kTc, T=1.1Tc,W=1.58kTc, T=1.1Tc,W=2.00kTc, T=1.1Tc,W=3.08kTc, T=1.1Tc,W=4.62kTc, T=1.1Tc,W=6.16kTc, T=1.1Tc,W=1.69kTc, T=1.1Tc,W=2.48kTc …]
